# Supplementary material for: Stress-driven emergence of heritable non-genetic drug resistance
Source: bioRxiv preprint, doi:10.1101/2024.12.20.629823, version 1 (2024-12-21)
Supplement: Table S5 [file 629823_file05.xlsx]

## Sheet: NaivvsL1_YPD_2FC_DEG
gene	A10_YPD	G8_YPD	DEG
C3_06870W_A	20.9425	20.2832	Not different
C4_06570C_A	20.3063	19.3295	Not different
C4_01750C_A	20.0213	18.5472	Downregulated
C1_08500C_A	19.9492	18.7713	Downregulated
C2_05460W_A	19.8567	18.3306	Downregulated
C5_05050W_A	19.6712	18.376	Downregulated
C2_03270W_A	18.9458	17.5226	Downregulated
C4_02370C_A	18.7175	18.2254	Not different
C6_00750C_A	18.5297	17.226	Downregulated
CR_04510W_A	18.5269	17.1849	Downregulated
C7_01800C_A	18.5251	17.6134	Not different
C5_04810W_A	18.1278	16.9451	Downregulated
C3_04060C_A	17.8928	17.0042	Not different
CR_08090W_A	18.0592	18.0059	Not different
C2_01000W_A	18.0942	17.6273	Not different
C2_03100W_A	17.9151	17.7758	Not different
C4_02390W_A	17.8622	17.2067	Not different
C3_07440W_A	17.5531	17.017	Not different
C1_08380W_A	17.632	17.5933	Not different
C1_08360C_A	17.6749	16.5408	Downregulated
CR_06340C_A	17.6565	16.4414	Downregulated
C1_06580W_A	17.4389	17.1083	Not different
C1_00180W_A	17.4346	17.3705	Not different
C2_05700W_A	17.2586	15.7129	Downregulated
C1_09190C_A	17.1288	15.637	Downregulated
C3_00320W_A	17.0761	16.5678	Not different
C1_03090W_A	17.1013	17.0408	Not different
C1_03020C_A	17.0652	16.9289	Not different
C2_08370C_A	16.9709	17.0587	Not different
C1_11060C_A	16.9659	16.9111	Not different
C1_03110W_A	16.8936	16.8529	Not different
C1_08590C_A	16.8624	15.5803	Downregulated
C3_05240C_A	16.8382	17.3698	Not different
C3_05370C_A	16.843	17.3874	Not different
C5_01580C_A	17.0011	17.4612	Not different
C1_14110C_A	16.9156	16.9933	Not different
C3_04670C_A	16.8744	17.2027	Not different
C7_02030W_A	16.926	16.8952	Not different
C3_01490W_A	16.7784	17.0626	Not different
C2_03810C_A	16.8363	16.6247	Not different
C2_07570W_A	16.771	15.4049	Downregulated
C6_01970C_A	16.7519	16.749	Not different
C2_09430W_A	16.7547	16.84	Not different
C3_04500C_A	16.73	17.145	Not different
CR_08150W_A	16.6342	16.5422	Not different
C1_03220C_A	16.6724	16.0184	Not different
C2_08290C_A	16.5724	15.7817	Not different
C1_02460W_A	16.7046	16.6411	Not different
C2_10620W_A	16.6628	16.5711	Not different
C2_01610C_A	16.6727	16.3937	Not different
C3_04830C_A	16.7125	15.8241	Not different
C2_05610C_A	16.5866	16.6293	Not different
C1_06450C_A	16.5821	16.4599	Not different
CR_00780C_A	16.5926	15.2707	Downregulated
C7_01790C_A	16.5817	16.5658	Not different
C1_05720W_A	16.635	16.551	Not different
C2_02860W_A	16.5332	14.886	Downregulated
C1_01350C_A	16.6245	16.6912	Not different
C5_03540C_A	16.5693	16.289	Not different
C5_00190C_A	16.5484	15.452	Downregulated
C4_01270W_A	16.4569	16.6465	Not different
C1_13860C_A	16.6251	16.0402	Not different
C3_07950C_A	16.5567	16.557	Not different
C2_08040C_A	16.4729	16.367	Not different
C3_04810C_A	16.5004	16.7093	Not different
C7_00960W_A	16.4491	16.3334	Not different
C4_00270W_A	16.5067	16.7892	Not different
C1_04300C_A	16.4982	17.0946	Not different
CR_03030C_A	16.411	16.2982	Not different
C2_03820C_A	16.3995	16.5196	Not different
C7_01250W_A	16.404	16.7178	Not different
C1_03030W_A	16.4237	16.3145	Not different
C5_03070W_A	16.4245	16.4278	Not different
C6_01610W_A	16.3327	16.1866	Not different
CR_04100C_A	16.2836	16.3214	Not different
C2_08590W_A	16.4377	15.7132	Not different
CR_10840C_A	16.3146	14.533	Downregulated
CR_07790C_A	16.0912	15.4368	Not different
C1_08790W_A	16.1817	15.7183	Not different
C3_02110W_A	16.148	16.8605	Not different
C1_10870W_A	16.1907	16.0089	Not different
C1_13700W_A	16.193	15.7541	Not different
C6_02240C_A	16.0993	16.1881	Not different
C3_05100C_A	16.1821	16.5259	Not different
C2_03010C_A	16.0505	15.3995	Not different
C3_04960W_A	16.0542	16.6007	Not different
C3_05200W_A	16.0963	16.0354	Not different
C1_12390C_A	16.1006	16.1076	Not different
C3_00090W_A	16.1982	16.4772	Not different
C4_04890C_A	16.0162	15.9206	Not different
CR_05340C_A	16.0112	14.2915	Downregulated
C4_07180W_A	16.0966	16.3097	Not different
CR_10250C_A	16.0693	15.4611	Not different
C1_13620W_A	16.0999	15.9741	Not different
C1_04400C_A	16.1172	15.7483	Not different
C1_03380W_A	16.0678	15.1703	Not different
C1_09250W_A	15.9437	15.0208	Not different
C1_03190C_A	16.0047	15.8886	Not different
C2_05710C_A	15.9515	16.0113	Not different
C7_01650W_A	15.906	14.8268	Downregulated
C1_03010W_A	15.9116	15.8585	Not different
CR_04090C_A	15.9944	15.3417	Not different
C1_01480C_A	15.9595	16.0258	Not different
C2_10690W_A	15.9773	14.1654	Downregulated
CR_00860C_A	15.8285	15.7878	Not different
C2_04600C_A	15.8425	16.0416	Not different
C4_01520C_A	15.8172	15.6866	Not different
C1_09720W_A	15.8942	14.3594	Downregulated
CR_03720W_A	15.8522	14.9097	Not different
C1_04100C_A	15.7977	15.4272	Not different
CR_07630C_A	15.7547	15.8643	Not different
C1_00060W_A	15.9881	15.1298	Not different
C1_08070W_A	15.8345	14.1418	Downregulated
C3_01540W_A	15.689	14.2577	Downregulated
C6_03760C_A	15.7155	14.9598	Not different
C2_05410W_A	15.6865	15.7617	Not different
C7_00990W_A	15.7638	15.6563	Not different
C1_13480W_A	15.7887	14.1172	Downregulated
C4_04900W_A	15.5903	15.6905	Not different
CR_00640W_A	15.6626	14.4858	Downregulated
C4_04480C_A	15.6406	15.7029	Not different
C1_13050W_A	15.5852	15.7252	Not different
C1_04680W_A	15.5804	14.5052	Downregulated
C1_04610W_A	15.7069	16.2096	Not different
C6_01700W_A	15.5949	15.6559	Not different
C1_08320W_A	15.6826	14.9738	Not different
C7_02380C_A	15.5517	15.0777	Not different
C3_02470C_A	15.4646	15.5219	Not different
C2_07380W_A	15.7262	15.8933	Not different
C1_13140C_A	15.623	16.0131	Not different
C2_08810C_A	15.5515	15.1368	Not different
C2_00210W_A	15.5369	15.7147	Not different
C1_10390C_A	15.47	15.4601	Not different
CR_01620C_A	15.656	15.3268	Not different
CR_07150W_A	15.5622	13.392	Downregulated
C3_07410C_A	15.5374	16.1521	Not different
C1_04290C_A	15.5348	15.2568	Not different
C5_03900W_A	15.4679	14.8282	Not different
C7_01640W_A	15.5351	15.3644	Not different
C3_06700C_A	15.4877	15.7865	Not different
C6_02010C_A	15.3285	14.6946	Not different
C2_03160C_A	15.3757	14.1746	Downregulated
C5_00660C_A	15.3578	14.0403	Downregulated
C3_07310C_A	15.5564	15.2191	Not different
C3_03900C_A	15.4194	15.5777	Not different
C4_02410C_A	15.3158	12.8287	Downregulated
C1_10790W_A	15.4619	15.1441	Not different
C6_02070C_A	15.3083	15.4598	Not different
C1_01360C_A	15.467	13.9678	Downregulated
C1_11650W_A	15.3353	14.9928	Not different
C1_03370W_A	15.51	15.9172	Not different
C4_01900C_A	15.3923	15.1175	Not different
C7_02600C_A	15.2968	13.9373	Downregulated
C3_04090W_A	15.328	15.0824	Not different
C3_06010W_A	15.2213	15.6079	Not different
C6_01910W_A	15.2264	14.9076	Not different
C1_06890C_A	15.2043	15.4018	Not different
C3_00550C_A	15.3841	14.7973	Not different
C1_11360W_A	15.2567	15.1986	Not different
C4_00160C_A	15.3157	14.3331	Not different
C2_01120W_A	15.3606	15.6538	Not different
CR_04810W_A	15.1612	15.3691	Not different
C1_14290C_A	15.3725	14.8948	Not different
C5_04300C_A	15.276	14.7871	Not different
C3_07270C_A	15.2228	15.476	Not different
C3_03420C_A	15.2343	16.0428	Not different
CR_00910W_A	15.1613	14.3477	Not different
C3_04550C_A	15.2119	14.5692	Not different
C3_07150C_A	15.0913	15.6138	Not different
C6_00330C_A	15.2762	14.9238	Not different
CR_10680W_A	15.4077	15.0963	Not different
C4_07110C_A	15.226	15.2304	Not different
C7_00930W_A	15.2261	13.8161	Downregulated
C1_13680C_A	15.0982	14.3373	Not different
CR_02820W_A	15.0382	13.7903	Downregulated
CR_05050W_A	15.1193	15.4556	Not different
C2_00250W_A	15.082	13.7053	Downregulated
C5_05440C_A	15.2837	14.123	Downregulated
CR_04590C_A	15.0255	13.7417	Downregulated
CR_08210C_A	15.1691	16.1267	Not different
C3_02480C_A	15.0038	14.2997	Not different
C1_04260W_A	15.0599	14.7787	Not different
C5_05230C_A	15.0307	15.1357	Not different
C4_01050C_A	15.0228	14.9823	Not different
C6_00870C_A	15.0451	15.3575	Not different
C4_04590W_A	15.0289	13.4019	Downregulated
C2_03180C_A	15.0034	14.2773	Not different
C3_06500W_A	15.0746	15.2389	Not different
CR_05670C_A	15.0417	13.95	Downregulated
C2_10030C_A	15.1349	14.6994	Not different
C5_04130C_A	15.3061	15.6057	Not different
C2_01020W_A	15.1619	14.9636	Not different
C2_06310C_A	14.9523	14.7569	Not different
C1_04890W_A	14.9765	14.8349	Not different
C2_09060C_A	15.0422	15.4191	Not different
CR_10850C_A	15.0119	14.6311	Not different
C1_11200W_A	14.9615	12.5751	Downregulated
C5_05480W_A	14.9709	14.1251	Not different
C3_04680W_A	15.0059	15.5159	Not different
C5_03510C_A	14.996	13.9145	Downregulated
CR_01760C_A	14.922	14.9078	Not different
CR_04210C_A	15.0297	14.9648	Not different
C2_03380W_A	15.1409	14.5436	Not different
CR_07400C_A	15.0027	14.7959	Not different
C1_06900C_A	14.9477	14.2073	Not different
C1_11860W_A	14.9816	14.6457	Not different
C1_05300C_A	14.8894	13.7499	Downregulated
C3_03800W_A	15.0033	15.0243	Not different
C4_04700W_A	14.9685	15.3012	Not different
C6_04380W_A	15.0455	14.0751	Not different
C1_10840C_A	14.9156	14.5026	Not different
C7_02840C_A	14.9204	13.9326	Not different
C1_08740C_A	14.9952	14.6957	Not different
C4_01700C_A	14.779	14.3848	Not different
C1_00210C_A	14.9032	14.0562	Not different
CR_08460W_A	14.7682	14.1636	Not different
C6_04520W_A	15.0225	15.1794	Not different
C3_01810C_A	14.921	15.1921	Not different
C7_03670W_A	14.8269	14.922	Not different
C3_04950W_A	14.8486	15.1276	Not different
C2_04950C_A	14.8851	14.7655	Not different
C1_12050W_A	14.8619	14.629	Not different
C2_09720W_A	14.9309	14.8185	Not different
CR_04660C_A	14.7972	14.1144	Not different
C3_00460W_A	14.847	15.4113	Not different
C4_05460C_A	14.768	13.6859	Downregulated
C1_06100C_A	14.8291	15.4837	Not different
C1_04170C_A	14.7812	14.5002	Not different
CR_01690C_A	14.8845	14.8902	Not different
C1_06930W_A	15.0431	14.8507	Not different
C4_01530C_A	14.7534	14.1197	Not different
C1_03510C_A	14.8235	13.3722	Downregulated
CR_08810W_A	14.8719	16.0276	Upregulated
C1_06460C_A	14.7526	14.9433	Not different
C2_02930C_A	14.7682	13.6462	Downregulated
CR_08360C_A	14.7534	14.5137	Not different
C7_03250C_A	14.8002	14.9071	Not different
C3_00850C_A	14.9342	14.5479	Not different
C1_09640W_A	14.7598	14.1692	Not different
C1_00070W_A	14.8787	14.3551	Not different
CR_09970W_A	14.7521	14.4967	Not different
C2_06810C_A	14.7349	15.0342	Not different
CR_09330C_A	14.7544	13.9693	Not different
C1_08460C_A	14.8303	14.1699	Not different
C1_11660W_A	14.7389	13.4866	Downregulated
C5_02380W_A	14.7164	12.7607	Downregulated
C1_12360C_A	14.6199	13.6425	Not different
C1_10450W_A	14.7127	14.1098	Not different
CR_05390W_A	14.7464	13.7941	Not different
C4_02270C_A	14.714	14.7108	Not different
C2_06570C_A	14.6204	13.1933	Downregulated
CR_08250C_A	14.7954	13.6332	Downregulated
C2_06730W_A	14.7233	14.3742	Not different
C1_08090C_A	14.902	15.1292	Not different
C5_03280W_A	14.5961	14.4765	Not different
C4_02940W_A	14.8424	13.8691	Not different
C1_07870C_A	14.6367	14.0531	Not different
C7_02610C_A	14.5538	12.9721	Downregulated
C1_06470W_A	14.6289	14.6632	Not different
C1_00590W_A	14.8094	14.9563	Not different
C1_08350C_A	14.5674	14.6295	Not different
C1_14440C_A	14.7693	14.0737	Not different
C6_00290W_A	14.812	13.5426	Downregulated
CR_09160C_A	14.5889	14.3488	Not different
C5_01910W_A	14.6432	14.3816	Not different
C4_00220C_A	14.6541	14.3229	Not different
C7_03920C_A	14.6367	14.4898	Not different
C3_03410C_A	14.7986	13.8606	Not different
CR_06150C_A	14.6576	13.8882	Not different
C5_00110C_A	14.7599	14.9286	Not different
CR_02070C_A	14.7061	12.1839	Downregulated
C6_02120W_A	14.6291	14.3565	Not different
CR_05780W_A	14.619	14.3846	Not different
C1_10820C_A	14.5332	13.6695	Not different
C2_08760C_A	14.8075	14.9981	Not different
CR_08300C_A	14.6594	13.8721	Not different
C5_05410C_A	14.7273	14.1556	Not different
C4_02440C_A	14.6159	13.7501	Not different
C1_00220W_A	14.7821	14.2111	Not different
C7_04230W_A	14.8197	14.502	Not different
C1_14280C_A	14.6458	14.086	Not different
C1_02120C_A	14.6031	15.3313	Not different
C1_01370C_A	14.4449	14.4263	Not different
C2_08300C_A	14.4959	13.0564	Downregulated
C2_10560C_A	14.5793	14.7347	Not different
C4_04150C_A	14.5667	14.6688	Not different
C1_14500C_A	14.5971	13.8561	Not different
CR_03170W_A	14.6113	14.4121	Not different
C5_04590C_A	14.5444	14.454	Not different
C1_05110C_A	14.6062	14.5622	Not different
CR_01470W_A	14.4525	12.4708	Downregulated
C7_00620W_A	14.5627	14.5219	Not different
C2_04310W_A	14.5067	14.1368	Not different
C5_00590W_A	14.5234	16.1306	Upregulated
C6_00650C_A	14.4081	14.8986	Not different
CR_10360C_A	14.4449	13.9662	Not different
C5_00370W_A	14.5372	13.7975	Not different
C1_09630W_A	14.5149	14.8238	Not different
C1_09680W_A	14.576	14.6357	Not different
C1_05290W_A	14.5503	14.5821	Not different
C1_10040W_A	14.4454	13.7958	Not different
CR_01440C_A	14.4663	14.5299	Not different
CR_02570C_A	14.3898	13.5585	Not different
C1_04180W_A	14.2962	14.1184	Not different
C2_06640C_A	14.4821	14.5979	Not different
CR_09880W_A	14.6945	14.177	Not different
C1_11670W_A	14.5341	12.7996	Downregulated
C2_06100W_A	14.5158	13.9839	Not different
C4_05140C_A	14.4403	12.0955	Downregulated
C3_04140C_A	14.3906	14.2489	Not different
C4_05670W_A	14.4766	14.1553	Not different
C4_04870C_A	14.5248	14.205	Not different
C7_00340C_A	14.486	13.6686	Not different
C1_04240C_A	14.3603	14.0868	Not different
C5_02940C_A	14.553	14.3976	Not different
C5_00930C_A	14.3878	12.696	Downregulated
C3_07020W_A	14.7598	14.6617	Not different
C7_04300W_A	14.6167	14.4531	Not different
C1_08980C_A	14.3623	13.5891	Not different
C7_03660C_A	14.4045	14.5456	Not different
C5_02860C_A	14.4157	12.9629	Downregulated
C4_06610C_A	14.487	14.734	Not different
C1_04320W_A	14.2903	13.5215	Not different
CR_06800C_A	14.2908	14.0911	Not different
C6_00720C_A	14.4685	14.0419	Not different
CR_03060W_A	14.4128	14.4374	Not different
C7_00350C_A	14.3858	12.9321	Downregulated
C1_12770W_A	14.4079	14.5549	Not different
C7_00440C_A	14.4016	13.9231	Not different
C7_00710W_A	14.3412	14.2376	Not different
CR_04190W_A	14.4062	13.5762	Not different
C4_03280W_A	14.2983	13.738	Not different
C3_04430W_A	14.3717	15.0371	Not different
CR_10350C_A	14.2477	13.6105	Not different
C7_01920W_A	14.419	13.8668	Not different
CR_10160W_A	14.3797	14.2254	Not different
C3_06440W_A	14.4769	14.4566	Not different
CR_09270C_A	14.3166	13.1302	Downregulated
C2_04870C_A	14.4315	14.1368	Not different
C4_01360W_A	14.2912	13.6893	Not different
C2_07490W_A	14.3673	13.5825	Not different
C4_05690W_A	14.3247	14.1103	Not different
CR_10070C_A	14.2395	13.3726	Not different
C2_01640W_A	14.496	13.7556	Not different
C6_00820W_A	14.3708	13.5978	Not different
C2_10550C_A	14.4249	14.4402	Not different
C1_06600W_A	14.308	13.7993	Not different
CR_05720W_A	14.2332	13.0435	Downregulated
C1_13940W_A	14.3674	13.8857	Not different
C4_05300W_A	14.2799	12.8889	Downregulated
C5_03550W_A	14.4527	14.3837	Not different
C3_01720C_A	14.2983	14.4742	Not different
CR_05380C_A	14.2773	13.1451	Downregulated
C5_03350W_A	14.2406	14.6191	Not different
C2_10860C_A	14.3257	13.8484	Not different
C5_04560C_A	14.1195	13.3916	Not different
C6_03960W_A	14.3137	13.3717	Not different
C2_02370C_A	14.2625	13.9789	Not different
C2_05180W_A	14.2508	10.842	Downregulated
C6_04130C_A	14.519	13.5375	Not different
C1_06550W_A	14.2596	13.2683	Not different
C1_02790W_A	14.2492	14.4717	Not different
C3_02780W_A	14.2323	14.9299	Not different
C2_01110C_A	14.2221	13.6993	Not different
CR_00580W_A	14.1874	14.1904	Not different
C5_00390C_A	14.2121	13.6709	Not different
C1_08430W_A	14.1698	12.883	Downregulated
C1_13300C_A	14.2482	13.9437	Not different
C5_04270C_A	14.2858	14.3006	Not different
C6_02260C_A	14.1579	14.076	Not different
CR_07010W_A	14.2974	14.1212	Not different
C1_07890C_A	14.2092	13.9591	Not different
CR_09790W_A	14.2091	14.2338	Not different
C2_03470C_A	14.1477	13.889	Not different
C3_00240C_A	14.2417	14.3451	Not different
C4_00020W_A	14.2186	13.4672	Not different
CR_02920C_A	14.2346	9.3764	Downregulated
C4_00890W_A	14.2154	14.2404	Not different
C5_02170C_A	14.2672	14.6094	Not different
C5_05390C_A	14.3072	13.6902	Not different
C1_02810W_A	14.1408	13.1367	Downregulated
C1_11040W_A	14.0661	14.1764	Not different
C7_01970C_A	14.2854	14.5074	Not different
C7_02890C_A	14.2545	14.1981	Not different
CR_10110W_A	14.3304	12.4188	Downregulated
C1_00110W_A	14.3016	14.2091	Not different
C1_03520W_A	14.0802	13.9184	Not different
C1_04830W_A	14.1564	13.9632	Not different
C3_01550C_A	14.2451	14.3855	Not different
C4_01690C_A	14.0184	12.8384	Downregulated
C2_03280W_A	14.2499	13.7674	Not different
C6_03340C_A	14.1107	12.9917	Downregulated
C6_02730W_A	14.149	13.6477	Not different
C7_00520W_A	14.1338	13.8148	Not different
C3_05710W_A	14.2046	14.4427	Not different
C3_07810C_A	14.1378	14.6138	Not different
C5_03140C_A	14.224	13.7029	Not different
C7_03360W_A	14.2909	13.1772	Downregulated
C1_13420C_A	14.0833	13.6531	Not different
CR_08890C_A	14.1232	10.4122	Downregulated
C1_01060W_A	14.0798	13.6166	Not different
C1_05940W_A	14.0697	13.7058	Not different
C2_01590W_A	14.0443	13.8391	Not different
C1_02710W_A	14.0738	14.1757	Not different
CR_09670C_A	14.0613	13.0264	Downregulated
C1_01690C_A	14.0658	14.2343	Not different
CR_04380C_A	14.0345	13.9507	Not different
CR_00320C_A	14.0604	13.8775	Not different
C3_07280C_A	14.1119	13.9387	Not different
C7_01810W_A	14.0953	13.9391	Not different
CR_03770C_A	13.9203	14.1554	Not different
C2_08860W_A	13.9918	13.1537	Not different
C2_10670W_A	14.1245	13.6279	Not different
CR_06080W_A	14.0376	13.5015	Not different
C5_05490C_A	14.1653	14.5318	Not different
C3_01610W_A	13.9957	14.824	Not different
C2_07630C_A	13.9503	11.0083	Downregulated
C4_05610C_A	14.1751	13.199	Not different
CR_04000W_A	14.0391	13.7731	Not different
C1_02330C_A	13.8298	14.0004	Not different
C1_02590C_A	14.0354	12.6451	Downregulated
C1_12030W_A	13.9807	14.2338	Not different
C1_10400C_A	14.0634	12.9818	Downregulated
CR_08120C_A	14.1544	13.865	Not different
C4_06870W_A	14.0083	13.6356	Not different
CR_08950W_A	13.9783	13.4215	Not different
C2_02340C_A	14.0809	13.8606	Not different
C2_05660W_A	14.0862	12.8178	Downregulated
C4_04800W_A	14.1039	13.4724	Not different
C3_04910C_A	14.1091	15.0107	Not different
C4_06030W_A	13.915	13.3596	Not different
C6_03370W_A	14.0502	14.0953	Not different
C2_03960W_A	13.8672	13.9494	Not different
C2_05500W_A	13.983	14.2451	Not different
C1_03130C_A	14.0243	13.4243	Not different
CR_00350W_A	14.0565	13.3893	Not different
C2_03060W_A	13.9995	13.6395	Not different
C6_01650C_A	13.784	12.7843	Not different
C3_00290W_A	14.0332	14.1891	Not different
C4_02870C_A	14.0259	14.4123	Not different
C1_11850W_A	13.9096	13.254	Not different
C4_05100C_A	14.0935	13.6089	Not different
C1_05540C_A	13.8886	12.9624	Not different
C1_03100W_A	14.0539	13.5626	Not different
C1_01590C_A	14.0547	14.0865	Not different
C1_07230W_A	13.8728	12.9356	Not different
C1_01930W_A	13.9852	11.2474	Downregulated
C1_13830C_A	13.9584	14.1578	Not different
C7_02780W_A	14.0311	13.6517	Not different
C2_09640W_A	13.9423	13.7582	Not different
C2_07310W_A	14.0192	14.0639	Not different
C3_02320W_A	14.003	14.5858	Not different
C4_01020C_A	13.8681	13.4069	Not different
C2_09950W_A	13.9152	13.4508	Not different
C3_00260C_A	13.946	13.6672	Not different
C5_03240W_A	13.8375	12.9701	Not different
C1_08950W_A	13.8556	12.8868	Not different
C1_08180C_A	13.9894	13.0267	Not different
C7_03810W_A	13.835	13.2856	Not different
C2_05720C_A	13.9295	13.5404	Not different
CR_02130W_A	13.8218	11.843	Downregulated
C2_07290W_A	13.8282	13.4524	Not different
C7_01850C_A	13.8895	13.1035	Not different
C4_00590C_A	13.9868	13.8276	Not different
C1_10680C_A	14.058	13.4108	Not different
C2_02410W_A	13.8318	12.4767	Downregulated
C6_00910C_A	13.9088	13.204	Not different
C1_14450C_A	14.0759	13.59	Not different
C4_06500W_A	13.859	13.3603	Not different
C2_08870C_A	13.8533	13.1774	Not different
C5_00480C_A	13.8634	13.2646	Not different
CR_08770W_A	13.9553	14.7648	Not different
C2_04580W_A	13.7691	13.452	Not different
C2_07400C_A	13.9724	13.0212	Not different
C4_02250C_A	13.8391	13.3916	Not different
C2_07550W_A	13.8713	13.6488	Not different
C1_01140C_A	13.969	13.4268	Not different
C2_00060C_A	13.9638	13.2133	Not different
C5_00200C_A	14.0226	13.6553	Not different
C2_09710C_A	13.8458	12.9565	Not different
C4_03180W_A	13.8875	12.9765	Not different
CR_01400W_A	13.8845	12.8401	Downregulated
C4_06760W_A	13.8835	13.468	Not different
C2_05690C_A	13.7313	13.3068	Not different
C2_02970C_A	13.8754	14.5799	Not different
C2_05250C_A	13.7872	13.053	Not different
C1_11590W_A	13.9866	13.5473	Not different
C1_10160W_A	13.8361	15.1425	Upregulated
C1_02620C_A	13.802	13.574	Not different
C6_04250W_A	13.7687	13.5889	Not different
CR_03530W_A	13.8747	14.1499	Not different
C7_04210C_A	13.8505	13.5093	Not different
CR_01310W_A	13.7513	14.1322	Not different
C2_07900W_A	13.8294	14.5538	Not different
C1_14460W_A	13.8851	13.4542	Not different
CR_04060C_A	13.7505	12.3374	Downregulated
C5_02270W_A	13.8815	13.436	Not different
C1_06940C_A	13.9114	11.9385	Downregulated
C6_04040C_A	13.8639	13.5716	Not different
C2_02380W_A	13.8452	13.4491	Not different
C2_09940W_A	13.7627	13.6351	Not different
C2_03240C_A	13.9173	13.4269	Not different
C7_00020C_A	13.8112	13.1373	Not different
C1_00930C_A	13.8291	13.5476	Not different
C1_08400C_A	13.935	13.498	Not different
C1_08030W_A	13.7242	13.0021	Not different
CR_08910C_A	13.7485	13.439	Not different
C7_02570C_A	13.7286	13.2975	Not different
C4_01060W_A	13.8373	13.6725	Not different
C1_14210C_A	13.8466	13.0356	Not different
C3_06890W_A	13.8794	14.5398	Not different
C1_03750W_A	13.6629	12.7412	Not different
CR_00360C_A	13.7576	13.6444	Not different
C6_02040W_A	13.7563	13.513	Not different
C1_03940W_A	13.6668	13.6095	Not different
CR_00470W_A	13.6998	13.5057	Not different
C1_08370W_A	13.9015	13.9074	Not different
C5_00650C_A	13.6813	13.2376	Not different
C2_01480W_A	13.8556	13.6248	Not different
C1_00610W_A	13.7413	13.3071	Not different
CR_04960C_A	13.6094	13.1279	Not different
C2_07210C_A	13.8038	12.9815	Not different
C2_03080W_A	13.9055	14.6815	Not different
C1_14060W_A	13.8263	11.9693	Downregulated
C1_10100C_A	13.6484	13.3324	Not different
C2_05920C_A	13.7144	13.3321	Not different
C1_07340W_A	13.774	13.0926	Not different
CR_07490C_A	13.7131	11.6828	Downregulated
C6_04650W_A	13.8941	12.873	Downregulated
CR_00100C_A	13.9517	13.6107	Not different
C1_05630C_A	13.8233	14.9255	Upregulated
C5_05380W_A	13.6879	13.3596	Not different
C6_00370C_A	13.8664	14.7386	Not different
C2_10280C_A	13.7135	13.2078	Not different
C4_04050C_A	13.6586	13.3957	Not different
CR_09010C_A	13.6657	12.5392	Downregulated
C7_03200C_A	13.6688	13.2395	Not different
C2_02830C_A	13.7916	13.4649	Not different
C2_07010W_A	13.7286	13.4744	Not different
C2_00380C_A	13.7617	13.2964	Not different
C1_11220C_A	13.7388	13.9792	Not different
C3_02400C_A	13.5417	13.8322	Not different
C1_02760W_A	13.7208	13.3597	Not different
C3_06360C_A	13.7053	13.9924	Not different
C5_02110W_A	13.7174	10.5734	Downregulated
C6_03400C_A	13.6307	13.657	Not different
CR_07830C_A	13.6808	13.349	Not different
C1_11030W_A	13.7057	13.4389	Not different
C3_01630W_A	13.7546	14.4776	Not different
CR_10670W_A	13.6902	13.6741	Not different
C6_03940C_A	13.7231	13.5386	Not different
C7_01450C_A	13.6726	14.2303	Not different
C5_00800C_A	13.7185	12.5839	Downregulated
C1_08880W_A	13.5289	12.3615	Downregulated
C3_00200C_A	13.7247	13.3523	Not different
C4_06130W_A	13.645	12.9023	Not different
CR_05920C_A	13.692	13.3452	Not different
C4_02980W_A	13.7185	13.9454	Not different
C2_06210C_A	13.6935	13.2972	Not different
C2_10350C_A	13.6889	12.837	Not different
C2_08780W_A	13.6879	13.3381	Not different
C2_10050W_A	13.6216	12.9363	Not different
C5_02080C_A	13.6153	10.5168	Downregulated
C6_03410C_A	13.4966	13.0437	Not different
C2_03520C_A	13.8433	13.0154	Not different
C1_03450C_A	13.6418	12.5821	Downregulated
C4_02620C_A	13.814	12.0386	Downregulated
C2_02770W_A	13.7447	13.6281	Not different
C6_01720C_A	13.8188	14.1989	Not different
C1_07540C_A	13.8181	13.013	Not different
C2_00260C_A	13.6457	12.2655	Downregulated
C2_06190W_A	13.6827	13.0133	Not different
C1_08540C_A	13.6884	13.3973	Not different
C1_03500W_A	13.6014	13.3171	Not different
C2_04620W_A	13.6312	13.3319	Not different
C6_04560W_A	13.6824	13.4219	Not different
CR_06760C_A	13.7164	13.6746	Not different
C3_06910C_A	13.6627	13.8064	Not different
C2_06940C_A	13.5268	11.9049	Downregulated
CR_04740C_A	13.7426	14.1927	Not different
C1_05960W_A	13.5876	11.186	Downregulated
C2_01620W_A	13.5738	13.5634	Not different
C4_00420C_A	13.7591	13.2051	Not different
C4_04770C_A	13.6155	12.9035	Not different
C5_00270W_A	13.6614	13.6224	Not different
C4_03360C_A	13.5348	13.1155	Not different
C2_00580C_A	13.6215	13.1248	Not different
C3_06850W_A	13.7133	12.6756	Downregulated
C2_10290W_A	13.7244	13.1468	Not different
C1_01870C_A	13.6711	13.8739	Not different
C5_02300C_A	13.5769	13.4895	Not different
C2_07420W_A	13.5668	12.522	Downregulated
C1_10620W_A	13.6273	14.5003	Not different
C6_00130C_A	13.7933	13.7666	Not different
C1_00710C_A	13.5697	13.8628	Not different
C6_01900C_A	13.5825	11.8094	Downregulated
C7_03860W_A	13.5994	12.6449	Not different
C3_02170C_A	13.6198	13.1975	Not different
CR_00560W_A	13.6218	12.48	Downregulated
C5_05200C_A	13.4902	12.3288	Downregulated
C1_02970W_A	13.5669	12.9463	Not different
C7_04260W_A	13.7057	13.0348	Not different
C1_03210C_A	13.5712	13.3755	Not different
C2_07320W_A	13.6175	13.0997	Not different
C6_00300C_A	13.6979	13.0807	Not different
C1_11540C_A	13.8138	13.2934	Not different
C2_06420C_A	13.6511	13.1407	Not different
C1_05660C_A	13.6283	13.5828	Not different
C6_04100W_A	13.6348	13.4455	Not different
C7_04240C_A	13.6521	12.5707	Downregulated
C1_00420W_A	13.5056	12.5174	Not different
C1_06850W_A	13.6222	13.1608	Not different
CR_03610C_A	13.602	13.4562	Not different
CR_09120C_A	13.6414	13.5972	Not different
CR_10490W_A	13.5313	13.4342	Not different
C7_00860W_A	13.6382	13.28	Not different
C1_08550C_A	13.4753	12.9907	Not different
C2_03760C_A	13.5756	13.205	Not different
C3_07490W_A	13.5725	13.1135	Not different
C2_06390C_A	13.661	14.328	Not different
C1_06780W_A	13.6347	12.7994	Not different
C6_01110W_A	13.5267	12.4945	Downregulated
CR_09530C_A	13.6789	12.7161	Not different
C5_04700C_A	13.5116	13.6384	Not different
C3_05310W_A	13.5559	13.3044	Not different
C1_11270W_A	13.5857	12.3048	Downregulated
C4_00200C_A	13.659	14.0548	Not different
C4_01490W_A	13.4878	13.9412	Not different
C1_03490W_A	13.489	11.7424	Downregulated
C6_04270W_A	13.5802	13.5314	Not different
C2_07130C_A	13.6853	12.7441	Not different
C1_09660W_A	13.5583	13.1041	Not different
CR_07650W_A	13.6569	13.7067	Not different
CR_01110W_A	13.557	13.3633	Not different
C2_01410C_A	13.6619	13.4159	Not different
C2_04140W_A	13.5956	13.2948	Not different
C4_04780W_A	13.6298	13.4121	Not different
C7_03330C_A	13.5904	13.6728	Not different
C4_00040W_A	13.7019	13.1236	Not different
C1_12620W_A	13.586	13.4316	Not different
C1_09850C_A	13.4871	12.7377	Not different
CR_08570W_A	13.6233	13.1794	Not different
C5_02890W_A	13.4855	14.5025	Upregulated
C3_02280C_A	13.5162	14.91	Upregulated
CR_09950C_A	13.5245	14.5922	Upregulated
C7_04020C_A	13.5722	13.1694	Not different
C5_01870W_A	13.5477	13.4754	Not different
C5_01960C_A	13.5887	13.4183	Not different
CR_05180C_A	13.4757	13.9172	Not different
C2_00340C_A	13.5746	13.5122	Not different
C5_01770C_A	13.537	12.8823	Not different
C5_04730C_A	13.645	13.6901	Not different
C2_08240W_A	13.509	12.7841	Not different
C1_11080W_A	13.3748	13.3248	Not different
C1_00500C_A	13.4521	12.6201	Not different
C1_05000W_A	13.4378	12.5775	Not different
C5_02930C_A	13.387	11.8525	Downregulated
C7_02100W_A	13.5057	13.4662	Not different
C5_01540W_A	13.44	13.5446	Not different
C6_03720W_A	13.5251	14.0332	Not different
C5_01820W_A	13.5204	14.0418	Not different
C1_14240W_A	13.457	13.2759	Not different
C1_01530C_A	13.4941	13.8464	Not different
C1_10490W_A	13.5032	13.0741	Not different
C3_04970C_A	13.4192	13.3006	Not different
C3_01860C_A	13.4542	14.0663	Not different
C2_00360C_A	13.5196	13.4649	Not different
C5_02230W_A	13.4378	13.07	Not different
C1_12410C_A	13.4392	12.4964	Not different
C1_00140W_A	13.6343	13.5173	Not different
C1_00740C_A	13.4244	13.6503	Not different
C2_00100C_A	13.4749	12.1618	Downregulated
C4_01760W_A	13.3359	12.7034	Not different
C5_01690C_A	13.3647	13.7134	Not different
C1_08610C_A	13.4554	14.0714	Not different
C3_04470W_A	13.5252	13.8361	Not different
C6_01320W_A	13.3428	13.3243	Not different
C1_05670W_A	13.4079	12.3235	Downregulated
CR_03520C_A	13.5049	12.9375	Not different
C4_03940C_A	13.3965	14.2651	Not different
C3_03870C_A	13.5175	13.5336	Not different
C6_00280W_A	13.5406	13.535	Not different
C4_05590W_A	13.3216	12.1991	Downregulated
C1_04590W_A	13.2632	12.4734	Not different
C1_03360W_A	13.495	13.3349	Not different
C1_14260C_A	13.4349	13.5254	Not different
C2_03360W_A	13.5044	13.3402	Not different
C1_08410C_A	13.3945	13.5831	Not different
CR_10370W_A	13.4103	13.5675	Not different
C1_01650W_A	13.3399	12.5112	Not different
C2_04850C_A	13.4837	13.0157	Not different
C2_10710W_A	13.4069	13.5693	Not different
C5_01210W_A	13.4714	13.5906	Not different
C5_01320W_A	13.5069	13.3758	Not different
C2_07100W_A	13.3703	12.8928	Not different
CR_08030C_A	13.472	12.8009	Not different
C6_01630W_A	13.4893	13.8299	Not different
C4_01720C_A	13.6653	13.7527	Not different
C1_14520W_A	13.541	13.0303	Not different
C6_02340W_A	13.5029	13.1816	Not different
C3_05590C_A	13.3308	13.9546	Not different
CR_01290C_A	13.4751	13.1678	Not different
C2_01850W_A	13.4027	13.323	Not different
C6_04280W_A	13.2954	12.3707	Not different
CR_00260W_A	13.6505	13.2609	Not different
C2_07740W_A	13.5722	13.3627	Not different
C4_01980C_A	13.3559	12.7759	Not different
C5_04600C_A	13.425	13.0628	Not different
C5_01080C_A	13.481	12.7609	Not different
C5_00080C_A	13.398	12.9526	Not different
C4_06830C_A	13.4289	13.5791	Not different
C2_08610W_A	13.3205	12.971	Not different
C1_03680W_A	13.4747	12.8064	Not different
C1_01490W_A	13.4044	12.6227	Not different
C3_04080W_A	13.3265	13.8945	Not different
C6_04570W_A	13.5111	12.9768	Not different
C4_00150C_A	13.4373	13.0985	Not different
C5_02840C_A	13.4019	13.05	Not different
C2_07330W_A	13.3987	13.0623	Not different
C4_06120W_A	13.3796	12.1943	Downregulated
C4_02780W_A	13.3728	13.5458	Not different
C2_09230C_A	13.4381	13.3288	Not different
C4_05390W_A	13.2921	12.3557	Not different
CR_06490C_A	13.5053	14.286	Not different
C1_08060W_A	13.3168	12.0132	Downregulated
C2_10210C_A	13.3915	13.194	Not different
C2_01010W_A	13.4389	13.1268	Not different
C1_10280C_A	13.3537	12.2003	Downregulated
C1_11330C_A	13.2915	12.6917	Not different
CR_09340W_A	13.3331	12.4337	Not different
C1_08700W_A	13.3977	12.9077	Not different
C2_05640W_A	13.4674	13.0248	Not different
CR_01590C_A	13.296	13.3305	Not different
C1_10660W_A	13.2784	13.0773	Not different
C4_00140C_A	13.4695	13.7588	Not different
C2_06020W_A	13.289	13.1707	Not different
C6_02060W_A	13.3044	13.1465	Not different
C5_02030W_A	13.316	13.0437	Not different
C2_05790C_A	13.3699	12.9841	Not different
CR_08480C_A	13.204	13.2983	Not different
C1_02480W_A	13.1647	12.8924	Not different
C2_04500W_A	13.2782	13.0537	Not different
CR_00980C_A	13.448	13.07	Not different
C3_03170W_A	13.3308	13.488	Not different
C4_06060W_A	13.3663	12.2617	Downregulated
C2_07590W_A	13.2494	12.566	Not different
C4_01840C_A	13.2502	12.7945	Not different
CR_10340W_A	13.4737	13.6589	Not different
C4_06810C_A	13.2789	13.0148	Not different
C2_10660W_A	13.4449	12.4931	Not different
C7_00830C_A	13.6223	13.2998	Not different
C3_04110C_A	13.2986	13.0149	Not different
C7_00070C_A	13.3378	13.0475	Not different
C4_05240C_A	13.3174	13.3959	Not different
CR_08340W_A	13.4092	14.1535	Not different
C6_01420C_A	13.2514	12.1292	Downregulated
C5_04110W_A	13.4818	12.488	Not different
C4_05450C_A	13.2464	12.9746	Not different
C1_03550C_A	13.3593	12.42	Not different
C3_06280W_A	13.3136	12.9897	Not different
C4_00170W_A	13.2447	12.448	Not different
C1_11350C_A	13.2057	12.9538	Not different
C6_04080W_A	13.2445	13.0584	Not different
C6_02560W_A	13.2697	11.6667	Downregulated
C2_09040W_A	13.1924	12.179	Downregulated
C6_02930W_A	13.2551	12.837	Not different
C3_04880W_A	13.3329	13.8819	Not different
CR_05300C_A	13.222	12.5313	Not different
C2_02590W_A	13.271	13.4218	Not different
C7_01900W_A	13.3706	13.8857	Not different
C3_04820C_A	13.2747	13.7797	Not different
C6_02500C_A	13.1385	12.2856	Not different
C2_08120W_A	13.3018	12.7492	Not different
C3_02150C_A	13.1764	13.7942	Not different
C1_08420W_A	13.2813	13.2498	Not different
C1_08560W_A	13.2714	13.5633	Not different
C1_07690C_A	13.1922	12.82	Not different
C4_01370W_A	13.2784	12.726	Not different
C3_07780C_A	13.4122	13.875	Not different
C1_11870W_A	13.2359	12.2554	Not different
C5_00790C_A	13.3939	13.4951	Not different
C1_05530C_A	13.2434	12.9058	Not different
C2_07060W_A	13.1978	12.056	Downregulated
C3_02680C_A	13.1575	12.1946	Not different
C2_03220C_A	13.3427	12.2449	Downregulated
C2_10240W_A	13.1479	12.8855	Not different
C2_09520C_A	13.2557	13.6036	Not different
C1_02750C_A	13.3083	13.2806	Not different
C2_03900C_A	13.2924	12.9328	Not different
C2_09650W_A	13.3	12.6447	Not different
C3_07260C_A	13.2841	13.638	Not different
CR_10580W_A	13.2245	12.7402	Not different
C4_02060C_A	13.2775	13.2848	Not different
C2_02720W_A	13.2942	13.3174	Not different
C7_03180C_A	13.1932	12.9282	Not different
C1_09650W_A	13.1935	12.2091	Not different
C1_03390W_A	13.2334	12.5126	Not different
C5_02710W_A	13.2601	12.9005	Not different
C1_09030C_A	13.1848	13.0191	Not different
CR_07480W_A	13.2532	12.037	Downregulated
C1_05560W_A	13.1994	12.1105	Downregulated
C4_02970C_A	13.247	13.053	Not different
C1_08110W_A	13.3716	13.8448	Not different
C1_08780W_A	13.1823	12.2859	Not different
C1_00440W_A	13.1934	13.3052	Not different
C3_05650W_A	13.2417	13.8313	Not different
C1_07410C_A	13.0937	12.5691	Not different
C6_02330W_A	13.2434	14.2788	Upregulated
C4_04390W_A	13.1792	13.1775	Not different
C2_01550W_A	13.2963	12.2674	Downregulated
C4_06720W_A	13.3273	14.5184	Upregulated
C2_09270C_A	13.1642	13.02	Not different
C1_01700W_A	13.1813	12.6801	Not different
C3_00770C_A	13.0542	13.4555	Not different
CR_05980W_A	13.1647	12.8137	Not different
C1_11730W_A	13.3065	13.0712	Not different
C2_04050C_A	13.2122	12.994	Not different
C1_12380C_A	13.1848	13.7446	Not different
C1_03120W_A	13.1272	12.3913	Not different
C2_08500W_A	13.2192	12.9206	Not different
C3_01890C_A	13.2568	13.6039	Not different
C3_03910W_A	13.1456	13.3031	Not different
C2_01530C_A	13.2521	12.7028	Not different
C5_05500C_A	13.2299	13.1542	Not different
C2_02100W_A	13.2015	12.9273	Not different
CR_02870W_A	13.1532	13.0219	Not different
C6_01760W_A	13.2359	13.1965	Not different
CR_10300W_A	13.2051	12.9485	Not different
CR_08710W_A	13.2795	13.1764	Not different
C3_03040W_A	13.2799	14.1277	Not different
CR_07090W_A	13.1607	12.7058	Not different
C7_03070C_A	13.1757	12.9249	Not different
CR_05440W_A	13.1817	11.8759	Downregulated
C2_09020W_A	13.2478	12.7996	Not different
CR_02090C_A	13.2201	13.1832	Not different
C2_08000C_A	13.2513	14.5258	Upregulated
CR_04570C_A	13.1163	13.0068	Not different
C7_04130C_A	13.1527	13.5198	Not different
C7_00750W_A	13.0346	12.1554	Not different
C1_13350W_A	13.2187	12.8051	Not different
C3_00250C_A	13.3181	14.0181	Not different
C7_00190W_A	13.2174	12.5795	Not different
CR_06180W_A	13.1186	12.4606	Not different
C6_00170C_A	13.3337	12.9973	Not different
C4_05810W_A	13.2001	12.5623	Not different
C7_00390W_A	13.195	13.3797	Not different
CR_01610C_A	13.1059	12.6907	Not different
CR_00520C_A	13.1914	13.3424	Not different
C1_10940C_A	13.1072	12.6541	Not different
C7_02640W_A	13.2551	13.4311	Not different
C4_01770W_A	13.0714	12.4259	Not different
C5_02790C_A	13.0955	12.8722	Not different
C4_04330C_A	13.1724	13.2037	Not different
C7_02910W_A	13.2371	13.9657	Not different
C2_05890C_A	13.1888	12.7089	Not different
C5_04800W_A	13.0965	12.4602	Not different
C1_06810W_A	13.3247	12.0312	Downregulated
C1_02050C_A	13.1881	12.2764	Not different
C1_03780C_A	13.1701	13.3591	Not different
C6_00100C_A	13.0791	12.8958	Not different
CR_07710W_A	13.121	13.1898	Not different
C5_00040C_A	13.1794	13.0628	Not different
C1_01320W_A	13.1712	13.233	Not different
CR_06750C_A	13.0501	12.7601	Not different
C5_01090C_A	13.0997	12.6614	Not different
CR_09140C_A	13.1754	9.56194	Downregulated
C1_01790W_A	13.1491	12.527	Not different
C1_06660W_A	13.1434	11.923	Downregulated
C1_12970C_A	13.0321	12.2807	Not different
C1_04210C_A	13.0997	12.904	Not different
C1_00950C_A	13.1952	12.9851	Not different
C2_03330C_A	13.1193	12.7547	Not different
C3_01990W_A	13.1042	13.424	Not different
CR_07450C_A	13.2326	12.8905	Not different
C3_00800W_A	13.2734	12.7	Not different
CR_08560C_A	13.0457	13.0187	Not different
C4_00260W_A	13.1518	12.3412	Not different
C2_08010W_A	13.0785	13.2422	Not different
C2_05930W_A	12.9976	12.5691	Not different
C5_00180W_A	13.2957	13.4252	Not different
C2_09750W_A	13.1298	12.5419	Not different
C1_12490W_A	13.1011	12.8311	Not different
C1_12960C_A	13.0955	12.5162	Not different
C4_06580W_A	12.9948	13.5985	Not different
C5_05450C_A	13.0879	11.4838	Downregulated
C4_00400W_A	13.2098	12.2436	Not different
C4_00570C_A	13.0149	12.328	Not different
C5_04640C_A	13.0821	12.9756	Not different
C7_00730W_A	13.0634	12.7183	Not different
C1_00160C_A	13.1535	14.337	Upregulated
C2_01690W_A	13.0166	13.6037	Not different
CR_09380W_A	13.0488	12.933	Not different
CR_02610C_A	13.0869	12.8945	Not different
C5_00150C_A	13.277	13.5345	Not different
CR_03990C_A	13.0965	12.9417	Not different
C1_11480W_A	13.0705	12.4247	Not different
C7_00150W_A	13.0739	12.5674	Not different
C1_10090C_A	13.1599	12.1943	Not different
C3_04860W_A	13.3249	13.6737	Not different
C1_11990W_A	13.0672	11.5304	Downregulated
C5_04920C_A	13.0103	12.5863	Not different
C1_13580W_A	13.0582	12.9929	Not different
C2_00140W_A	13.3618	12.6015	Not different
C2_08390W_A	12.9682	11.7576	Downregulated
CR_04340W_A	13.1914	13.4282	Not different
CR_10140W_A	13.0374	13.8297	Not different
C1_14340C_A	13.3804	13.3725	Not different
C6_00440C_A	13.2928	14.4572	Upregulated
C6_04480C_A	13.0069	12.0177	Not different
C3_04590W_A	12.9791	13.1843	Not different
C3_05880C_A	13.1179	13.5626	Not different
C1_00750C_A	13.1547	12.7587	Not different
C7_03010W_A	13.06	12.9627	Not different
C3_02610C_A	13.0666	12.24	Not different
C1_00040W_A	12.8589	13.0494	Not different
C1_04420C_A	12.9652	12.7151	Not different
C1_09490C_A	13.182	14.4314	Upregulated
C2_00830C_A	13.1108	12.9935	Not different
C1_04450C_A	12.9575	12.678	Not different
C7_00030W_A	13.1313	12.5716	Not different
C3_00110C_A	13.1565	13.2072	Not different
CR_04300W_A	13.0672	13.5773	Not different
CR_07420W_A	13.1294	13.9397	Not different
C2_01270W_A	12.9989	12.8373	Not different
C1_04480C_A	13.0652	12.404	Not different
C1_03560C_A	13.0629	12.8944	Not different
CR_03810W_A	13.151	11.8165	Downregulated
C2_06150C_A	13.0127	12.9037	Not different
C1_07710C_A	13.006	13.3576	Not different
CR_04080C_A	13.0979	13.4331	Not different
C2_08930W_A	12.8871	12.6754	Not different
C5_02470W_A	13.0221	12.9683	Not different
C1_04970W_A	13.0907	13.4649	Not different
CR_07230W_A	13.0247	12.4402	Not different
CR_07440W_A	13.22	12.8073	Not different
C3_07560W_A	13.4127	12.7349	Not different
C3_02180C_A	12.9194	13.7447	Not different
CR_04140W_A	13.0344	13.5687	Not different
C5_02000C_A	13.0965	13.6833	Not different
CR_08430W_A	13.0812	12.6337	Not different
C2_00760C_A	12.9696	11.8816	Downregulated
CR_03280W_A	12.9753	12.0341	Not different
C1_11170W_A	12.9665	12.9088	Not different
C2_00400C_A	12.9096	13.3942	Not different
C3_05930W_A	12.9577	13.2289	Not different
C3_02490C_A	12.9743	13.5388	Not different
C7_01780W_A	13.0445	12.5075	Not different
C2_00120C_A	13.0639	12.4803	Not different
CR_04720C_A	12.9102	12.2235	Not different
C1_13810W_A	13.0621	12.5751	Not different
C2_08130W_A	12.9412	11.0851	Downregulated
C7_00740W_A	13.0099	12.3575	Not different
C2_05100C_A	12.968	13.7861	Not different
C3_05970C_A	13.1782	13.1889	Not different
C3_04390W_A	12.8804	13.483	Not different
CR_02170W_A	13.0512	12.9005	Not different
C1_04520C_A	12.9825	12.4393	Not different
C2_09460C_A	13.0521	12.228	Not different
C1_12320C_A	12.8747	13.1209	Not different
C4_02890C_A	12.9312	12.6731	Not different
C1_05170C_A	13.0212	12.3459	Not different
C5_05120W_A	13.0423	13.3907	Not different
C1_00480C_A	13.1263	13.1943	Not different
C4_03110W_A	12.9217	12.5254	Not different
C3_05450C_A	12.9154	12.41	Not different
C4_06270C_A	12.8479	12.1503	Not different
C2_10590W_A	13.0826	12.9849	Not different
C2_08160C_A	12.9066	12.7979	Not different
C1_06960W_A	12.9347	13.3158	Not different
C2_07730W_A	13.0993	12.5385	Not different
C3_03280C_A	12.9078	13.0582	Not different
C7_03890C_A	13.0275	12.9821	Not different
CR_09980W_A	12.9772	12.7665	Not different
C1_02980W_A	12.964	10.6464	Downregulated
C1_10890C_A	12.893	12.3534	Not different
C2_07600C_A	13.0386	12.4388	Not different
C4_05150W_A	12.8879	12.7763	Not different
C1_08600C_A	13.0304	13.157	Not different
C6_02470W_A	12.7948	12.8357	Not different
C1_03310W_A	12.9339	12.7941	Not different
CR_09690C_A	13.0026	12.7628	Not different
C7_01940C_A	13.016	12.1997	Not different
C1_01560W_A	13.2018	12.8894	Not different
C6_03130W_A	12.9233	12.9863	Not different
C7_01550W_A	12.9016	12.9136	Not different
C6_03160C_A	12.9318	12.2788	Not different
C2_03140C_A	12.8877	12.1096	Not different
C2_02460W_A	12.9929	12.2238	Not different
C1_07180W_A	12.9453	12.4339	Not different
C4_03600C_A	12.8335	11.9995	Not different
C2_07390C_A	13.0392	12.6289	Not different
CR_02040W_A	12.9816	12.6407	Not different
C2_01600C_A	12.9148	12.8335	Not different
C7_03720C_A	12.9284	13.3196	Not different
CR_00490W_A	12.9455	12.9622	Not different
C3_07420W_A	12.9148	13.7509	Not different
C3_02160C_A	13.1677	13.7297	Not different
C3_07730W_A	13.0173	11.6868	Downregulated
CR_04180C_A	13.0056	12.6972	Not different
C1_11770C_A	13.1442	12.7111	Not different
CR_08000C_A	13.0621	12.9271	Not different
C2_04220C_A	12.8792	12.6611	Not different
CR_04550W_A	12.8857	12.6846	Not different
C2_02030W_A	12.8776	13.7191	Not different
C4_00070C_A	13.0484	12.628	Not different
CR_00060C_A	13.0612	12.6432	Not different
C4_06340W_A	12.7759	12.098	Not different
C2_01990C_A	12.7391	12.1497	Not different
C2_01430W_A	12.8637	12.8456	Not different
C3_05520C_A	12.9711	13.4917	Not different
C3_00450C_A	12.9921	13.7544	Not different
C3_00710W_A	12.9652	13.6055	Not different
CR_01240C_A	13.0664	12.6744	Not different
C4_00280W_A	12.911	12.8454	Not different
C6_02600W_A	13.004	12.653	Not different
C2_06170C_A	13.0605	13.647	Not different
CR_01820W_A	12.8794	12.6893	Not different
C1_13190W_A	12.7969	11.8079	Not different
C3_06860C_A	12.7598	12.8568	Not different
C1_08270C_A	13.0759	12.8814	Not different
C2_06290C_A	12.8027	13.194	Not different
C4_02320C_A	12.8438	12.5315	Not different
C5_04050W_A	12.8879	11.7439	Downregulated
C1_09610W_A	12.7854	11.9234	Not different
C2_02760W_A	12.9281	13.0686	Not different
C2_07140W_A	12.6977	11.8079	Not different
C1_12230W_A	12.9398	12.5854	Not different
C1_11550W_A	12.8976	13.3866	Not different
C4_06680C_A	13.072	12.9991	Not different
C4_01250W_A	12.7913	10.9126	Downregulated
C2_07610C_A	12.877	12.6036	Not different
C6_03460W_A	13.0648	12.6715	Not different
C1_11450C_A	12.9563	13.1711	Not different
CR_02510W_A	12.958	12.4973	Not different
C2_06820C_A	12.8643	12.6972	Not different
C3_03260W_A	12.9208	13.3441	Not different
CR_00250W_A	12.8471	12.6023	Not different
C1_13920W_A	12.7978	11.6601	Downregulated
C2_00740C_A	12.8606	12.2576	Not different
CR_04200W_A	12.9386	13.9938	Upregulated
C5_00750C_A	12.8898	12.0538	Not different
C1_11120C_A	12.8085	12.5525	Not different
C4_07190W_A	12.9279	12.7135	Not different
C2_07220W_A	12.8102	12.3412	Not different
C1_08010W_A	12.8164	12.5828	Not different
C2_06540C_A	12.9507	12.9232	Not different
CR_07050C_A	13.1051	14.123	Upregulated
C4_00450C_A	12.8049	10.0602	Downregulated
CR_02000C_A	12.9425	12.4822	Not different
C4_04530C_A	13.0304	13.0367	Not different
C1_02920W_A	12.8341	12.3998	Not different
C2_09980W_A	12.8306	11.822	Downregulated
CR_07890W_A	13.0634	12.4551	Not different
C2_07640W_A	12.824	12.1271	Not different
C3_05150W_A	12.9715	13.0919	Not different
C2_07650C_A	12.7671	12.202	Not different
C2_01220W_A	12.7809	12.7308	Not different
C5_02660C_A	12.8217	13.4281	Not different
C7_00550C_A	12.8922	13.4182	Not different
C1_14190C_A	12.7932	11.5281	Downregulated
C2_00570W_A	12.9472	12.7955	Not different
C3_04300C_A	12.8964	13.0071	Not different
C1_02780W_A	12.8034	11.6889	Downregulated
C2_05650W_A	12.8651	12.3528	Not different
C2_01390W_A	12.9288	12.5984	Not different
C4_05540W_A	12.8192	12.8894	Not different
C5_02210W_A	12.7605	12.6686	Not different
CR_08020C_A	12.8132	12.9548	Not different
C7_02860C_A	12.892	12.7751	Not different
C5_03500W_A	12.8523	12.6505	Not different
C5_01520C_A	12.817	12.7125	Not different
CR_00230W_A	12.8678	12.9648	Not different
C6_00350W_A	13.0171	12.4798	Not different
C1_03860C_A	12.8639	12.7268	Not different
CR_06810W_A	12.726	12.5971	Not different
C7_01230C_A	12.7362	12.5087	Not different
CR_01970C_A	12.7713	12.3288	Not different
C2_04030C_A	12.8291	13.0112	Not different
C1_09830W_A	12.8102	12.7298	Not different
CR_05080W_A	12.7902	12.8034	Not different
C3_03360W_A	12.793	12.7105	Not different
C4_03290W_A	12.7664	13.0744	Not different
C4_04580W_A	12.9991	12.7459	Not different
C3_05210C_A	12.7943	13.1759	Not different
C2_08800C_A	12.8488	12.3569	Not different
CR_08650C_A	12.8837	12.0786	Not different
C1_03620C_A	12.6624	12.7382	Not different
C1_02420C_A	12.9665	12.8211	Not different
C3_01910C_A	12.8213	13.353	Not different
C1_07840W_A	12.6928	11.882	Not different
C2_10750C_A	12.8896	12.8152	Not different
C4_01710C_A	13.0585	12.7695	Not different
C7_04280C_A	12.8168	11.4328	Downregulated
C5_00070W_A	12.7986	12.8386	Not different
C1_12450C_A	12.7344	12.4516	Not different
C3_06070C_A	12.7991	13.2903	Not different
C2_04550C_A	12.8209	13.8811	Upregulated
C3_01530C_A	12.6602	12.7921	Not different
C1_06590C_A	12.7876	12.5856	Not different
C2_03410W_A	12.8187	12.4706	Not different
CR_01500W_A	12.988	12.7206	Not different
CR_08290W_A	12.845	12.361	Not different
CR_04050C_A	12.8316	12.9393	Not different
C2_10010C_A	12.6914	12.4415	Not different
C4_02470C_A	12.6507	12.5345	Not different
C4_05430C_A	12.748	12.2235	Not different
C1_04230W_A	12.6882	12.2685	Not different
CR_01170W_A	12.6816	12.7069	Not different
C5_00030W_A	12.9459	13.0755	Not different
C2_05530C_A	12.7995	12.4775	Not different
C2_07560W_A	12.8665	12.7018	Not different
C1_03480C_A	12.6624	12.1232	Not different
CR_05240C_A	12.7571	12.4758	Not different
C4_03390W_A	12.7002	12.4592	Not different
C5_00210C_A	12.8628	12.8406	Not different
CR_04530W_A	12.7278	12.1205	Not different
C2_07930C_A	13.0278	12.3238	Not different
C6_02280W_A	12.7669	11.7989	Not different
C1_00080C_A	12.7774	11.9602	Not different
C2_01670C_A	12.7489	12.9232	Not different
CR_09650W_A	13.0481	12.4938	Not different
C1_10380C_A	12.8232	13.0325	Not different
C6_03750C_A	12.6923	12.4618	Not different
C5_03960W_A	12.7389	12.4424	Not different
C1_09460W_A	12.7131	13.0104	Not different
C1_08490W_A	12.7348	12.4623	Not different
C1_01520C_A	12.6872	12.2068	Not different
C4_06600W_A	12.6868	12.495	Not different
C2_01200C_A	12.9363	13.5531	Not different
CR_00510C_A	12.6424	12.0885	Not different
CR_07190W_A	12.7303	12.5836	Not different
C1_04960C_A	12.5328	12.1441	Not different
C1_01890C_A	12.7965	11.973	Not different
C5_04290C_A	12.6988	12.3983	Not different
C2_02020W_A	12.7069	12.3858	Not different
C4_05030C_A	12.7737	12.5654	Not different
CR_06700C_A	12.6683	11.7018	Not different
C1_03730C_A	12.7377	12.4003	Not different
C2_09320C_A	12.8369	14.0385	Upregulated
CR_02930W_A	12.6624	12.1732	Not different
CR_04360C_A	12.6912	13.2252	Not different
CR_10800C_A	12.9703	12.6655	Not different
CR_02150W_A	12.7023	12.3423	Not different
C6_00150W_A	12.9443	13.5501	Not different
C1_11310C_A	12.7222	12.8333	Not different
C5_00220W_A	12.7627	12.371	Not different
C1_10010C_A	12.7613	12.284	Not different
C6_02980C_A	12.7027	11.9375	Not different
C6_03900W_A	12.711	12.3881	Not different
C7_03240W_A	12.6199	12.1589	Not different
C2_02990C_A	12.7554	12.2593	Not different
C1_08940C_A	12.8498	12.1954	Not different
C7_03270W_A	13.0073	13.5675	Not different
C3_03520C_A	12.6886	13.1319	Not different
C2_00490W_A	12.7133	12.3262	Not different
CR_02860W_A	12.7078	13.0314	Not different
C2_05470W_A	12.7128	12.2931	Not different
C7_02770W_A	12.7285	12.6878	Not different
CR_08060C_A	12.7487	12.0655	Not different
C6_02610C_A	12.5841	12.6047	Not different
C1_08050W_A	12.601	12.8991	Not different
C4_05900C_A	12.8138	12.102	Not different
C2_10850C_A	12.8121	12.7081	Not different
C2_10460C_A	12.6784	12.6832	Not different
C3_04520C_A	12.7791	13.1223	Not different
C4_06400C_A	12.5746	12.3682	Not different
C1_02210W_A	12.7328	11.9706	Not different
C3_02920W_A	12.6179	12.9309	Not different
C7_02850W_A	12.6081	12.3358	Not different
C6_00410C_A	12.7471	12.3319	Not different
CR_01520W_A	12.7265	12.6549	Not different
C6_04500C_A	12.7516	12.609	Not different
C7_03370C_A	12.5663	12.1951	Not different
C1_03350C_A	12.8604	13.4698	Not different
C3_07060W_A	12.6196	13.759	Upregulated
C3_01670W_A	12.6898	12.6303	Not different
C6_03710W_A	12.7699	11.2942	Downregulated
C2_02980C_A	12.7865	12.3575	Not different
CR_05210W_A	12.6407	12.3093	Not different
C1_06520C_A	12.5528	11.6214	Not different
C1_01250W_A	12.7359	12.8004	Not different
C3_06820C_A	12.7948	12.94	Not different
C1_02820W_A	12.7359	12.7955	Not different
C4_01950W_A	12.6052	11.976	Not different
C6_02220W_A	12.5229	12.1897	Not different
C1_04770C_A	12.6655	11.3249	Downregulated
C5_04090C_A	12.6262	12.8747	Not different
CR_01750C_A	12.697	12.5281	Not different
C7_01470C_A	12.552	12.5518	Not different
C3_00670C_A	12.7778	12.8013	Not different
C6_03380W_A	12.6984	13.1483	Not different
C4_06650W_A	12.6221	12.304	Not different
C1_14360C_A	12.8283	11.9646	Not different
C1_10360C_A	12.8104	12.2704	Not different
C2_08490W_A	12.6407	12.1005	Not different
C6_04290W_A	12.9	12.8268	Not different
CR_02390W_A	12.7011	12.1715	Not different
CR_04450C_A	12.7323	12.5061	Not different
C1_13030C_A	12.6633	13.3581	Not different
CR_08660W_A	12.6907	12.8574	Not different
C3_00820W_A	12.6666	12.7206	Not different
C3_05190C_A	12.6732	12.5311	Not different
C4_03020W_A	12.7228	12.1238	Not different
C1_03690W_A	12.6192	12.2587	Not different
C1_08800W_A	12.5252	12.0258	Not different
C3_03670W_A	12.4684	11.8641	Not different
C5_05400W_A	12.6854	12.7934	Not different
C1_13260W_A	12.5784	11.8605	Not different
C1_14300C_A	12.7769	11.6889	Downregulated
C3_00480C_A	12.5831	11.5502	Downregulated
C5_01290C_A	12.601	12.0418	Not different
C4_02360W_A	12.5069	11.243	Downregulated
CR_06470W_A	12.6201	12.1465	Not different
C5_01230C_A	12.4859	12.0614	Not different
C4_04830W_A	12.5789	12.3551	Not different
C1_10930C_A	12.5741	12.1062	Not different
C1_00730C_A	12.6725	12.5958	Not different
C1_02370C_A	12.6079	11.8434	Not different
C3_00760W_A	12.566	11.8716	Not different
C1_04730C_A	12.5203	12.7115	Not different
C1_07110W_A	12.664	12.2691	Not different
C4_04160W_A	12.5268	12.4793	Not different
C7_01710W_A	12.533	12.2386	Not different
C4_06110C_A	12.7043	13.2938	Not different
C3_06590W_A	12.5809	12.8682	Not different
C3_07250W_A	12.5508	13.3706	Not different
C3_06920W_A	12.4312	12.4451	Not different
C4_01870C_A	12.5758	12.4875	Not different
C1_14420W_A	12.6965	12.062	Not different
C1_03400W_A	12.6921	12.0109	Not different
CR_01350C_A	12.5312	12.4257	Not different
C4_05180C_A	12.5916	12.4661	Not different
C1_07880C_A	12.6148	12.3091	Not different
C1_09990W_A	12.499	12.3043	Not different
C3_01950C_A	12.4995	12.4539	Not different
C2_03790C_A	12.6226	10.7776	Downregulated
C1_08220W_A	12.6579	12.5795	Not different
C4_01660W_A	12.5413	12.3963	Not different
C5_02850W_A	12.5622	12.8989	Not different
C5_04670W_A	12.6199	12.3143	Not different
C2_05110W_A	12.5693	12.0232	Not different
C3_07010W_A	12.5814	11.806	Not different
CR_09300C_A	12.6426	12.3536	Not different
C7_00320C_A	12.7242	12.7451	Not different
C1_02650W_A	12.5502	12.7661	Not different
C2_03020C_A	12.7121	11.7768	Not different
C3_06300W_A	12.633	12.9033	Not different
C1_14140C_A	12.6354	12.1044	Not different
C4_05960W_A	12.5541	12.0447	Not different
C1_09690W_A	12.6335	10.7692	Downregulated
CR_01740W_A	12.4998	12.7659	Not different
C2_04370W_A	12.5229	12.8578	Not different
C7_03220C_A	12.5683	12.3843	Not different
C4_06800W_A	12.5698	12.6491	Not different
C3_00490W_A	12.6361	12.5889	Not different
CR_05750W_A	12.6233	10.7761	Downregulated
C7_03490W_A	12.5074	11.9873	Not different
C5_04750C_A	12.5769	13.619	Upregulated
C1_09080C_A	12.7706	12.9957	Not different
C2_10440C_A	12.5711	12.1148	Not different
C4_07060W_A	12.714	13.1571	Not different
C1_14470W_A	12.6428	11.8912	Not different
C1_03440C_A	12.5348	12.4633	Not different
C4_03960W_A	12.3159	11.2541	Downregulated
C2_08100W_A	12.5085	11.7043	Not different
C5_00300C_A	12.597	12.3402	Not different
CR_07590W_A	12.5203	12.4499	Not different
C4_05970W_A	12.624	11.9531	Not different
CR_00540C_A	12.4913	12.1682	Not different
C6_01150W_A	12.6678	12.6758	Not different
C1_00650C_A	12.4527	12.2634	Not different
C3_07680W_A	12.5753	12.7179	Not different
C6_03650C_A	12.5533	12.2877	Not different
CR_00400C_A	12.5597	12.2114	Not different
C4_02120W_A	12.4466	12.7278	Not different
C2_09400C_A	12.5708	11.6614	Not different
C6_00560W_A	12.4803	11.9866	Not different
CR_08050C_A	12.5449	12.0717	Not different
CR_03420C_A	12.7242	12.5112	Not different
C7_04040C_A	12.4862	12.0761	Not different
C7_02810W_A	12.6069	13.1305	Not different
C2_01380W_A	12.6671	10.9484	Downregulated
C4_00780C_A	12.5032	12.6238	Not different
C1_06080C_A	12.3621	12.1301	Not different
C4_00970C_A	12.7787	13.7149	Not different
C7_01840W_A	12.5296	12.7355	Not different
CR_00120C_A	12.5921	12.7566	Not different
CR_06070W_A	12.6445	12.1426	Not different
C1_01050C_A	12.4798	12.402	Not different
C7_03940C_A	12.5418	11.8912	Not different
C5_04430C_A	12.5276	11.9981	Not different
C1_14120C_A	12.6015	10.7738	Downregulated
C6_03920W_A	12.4295	12.0965	Not different
CR_02770C_A	12.402	11.9985	Not different
C1_07270W_A	12.4579	12.3441	Not different
C7_00250C_A	12.4776	12.3251	Not different
C6_03350C_A	12.48	12.0916	Not different
C4_02860W_A	12.4119	11.6359	Not different
C3_07000W_A	12.5124	12.814	Not different
C4_03590C_A	12.5781	12.2341	Not different
C2_06230W_A	12.5786	12.5954	Not different
C5_00830C_A	12.5216	12.2288	Not different
C3_07610W_A	12.5436	12.9271	Not different
C2_06320W_A	12.6536	12.3495	Not different
C5_00500W_A	12.5599	12.9405	Not different
C4_05740C_A	12.4976	12.5636	Not different
C1_02260C_A	12.3763	12.3768	Not different
C4_05630W_A	12.4854	12.4279	Not different
C3_06560W_A	12.5589	12.5274	Not different
C6_00190W_A	12.5278	12.0937	Not different
C2_02050C_A	12.515	12.3873	Not different
C4_04240C_A	12.7053	12.4482	Not different
C7_00890C_A	12.5061	12.6323	Not different
C1_13930W_A	12.6647	11.6881	Not different
C3_01760W_A	12.5908	13.2164	Not different
C4_00770C_A	12.3739	12.2601	Not different
C3_03680W_A	12.5559	12.2653	Not different
C2_04240C_A	12.3932	12.1017	Not different
CR_08640C_A	12.5428	12.872	Not different
C6_01220C_A	12.4603	12.3936	Not different
C4_02290W_A	12.4113	12.0752	Not different
C1_08450C_A	12.525	12.5415	Not different
C3_04780C_A	12.4573	12.7312	Not different
C2_04230W_A	12.5114	12.0998	Not different
C1_14250C_A	12.5665	11.9409	Not different
C1_11400C_A	12.5402	12.0922	Not different
C2_00710W_A	12.495	12.1828	Not different
CR_03470W_A	12.5273	11.1072	Downregulated
C3_02260C_A	12.4353	12.7711	Not different
C3_07320W_A	12.6455	12.8805	Not different
CR_05950C_A	12.5738	12.0274	Not different
C6_00620W_A	12.4107	11.4997	Not different
CR_09550C_A	12.3903	12.5082	Not different
C2_08190W_A	12.4409	12.3943	Not different
C1_04910C_A	12.3711	11.2931	Downregulated
C4_06540W_A	12.4169	11.5245	Not different
C2_02000W_A	12.4453	12.2571	Not different
C3_01700W_A	12.4966	12.98	Not different
C7_02790C_A	12.5713	12.2221	Not different
C4_01300W_A	12.4806	11.1934	Downregulated
C7_02390W_A	12.3638	11.6913	Not different
C1_13220C_A	12.4784	12.1157	Not different
C4_00300C_A	12.6182	12.4448	Not different
C1_13320C_A	12.5756	12.5702	Not different
C4_04260C_A	12.4897	12.3337	Not different
C4_05320W_A	12.44	12.5797	Not different
C4_07130W_A	12.5561	12.3379	Not different
C2_03800C_A	12.5208	12.0674	Not different
C5_02400W_A	12.4595	12.0255	Not different
C7_00670C_A	12.5064	12.3046	Not different
C3_05700W_A	12.7308	13.2496	Not different
C1_06530C_A	12.4701	12.4043	Not different
CR_07000C_A	12.3156	11.7306	Not different
C1_00530C_A	12.4961	12.0683	Not different
C2_00190C_A	12.5177	12.0807	Not different
C5_03390C_A	12.3547	12.0798	Not different
C5_04100W_A	12.4929	11.8845	Not different
C7_04200C_A	12.5116	13.12	Not different
C2_03540W_A	12.539	11.756	Not different
C4_05280W_A	12.3521	12.1571	Not different
C1_07440W_A	12.491	11.7902	Not different
C1_14040W_A	12.376	11.6672	Not different
C2_04760W_A	12.6505	12.3981	Not different
CR_10230W_A	12.4905	12.0598	Not different
C4_06740C_A	12.4164	12.018	Not different
C1_03760C_A	12.4014	12.24	Not different
CR_10600C_A	12.5148	12.2226	Not different
C2_09740W_A	12.4239	12.2818	Not different
CR_03500W_A	12.5405	15.1094	Upregulated
C1_00460W_A	12.4931	12.492	Not different
C4_03200C_A	12.2544	11.5609	Not different
CR_08350W_A	12.4065	12.2277	Not different
C3_05220W_A	12.5087	14.8278	Upregulated
C5_01800C_A	12.4334	12.0983	Not different
C2_07190C_A	12.3629	12.7789	Not different
C2_03300W_A	12.4776	12.3699	Not different
C3_04400C_A	12.4411	12.9971	Not different
C6_03250W_A	12.4014	9.88526	Downregulated
C5_02050W_A	12.514	12.4259	Not different
C2_09970C_A	12.3676	12.5618	Not different
C2_05220C_A	12.4256	12.4642	Not different
C7_00360W_A	12.4414	12.4594	Not different
C3_00880W_A	12.5926	14.1341	Upregulated
C1_03160C_A	12.3877	11.9463	Not different
C2_04170C_A	12.4088	12.5473	Not different
C4_04710W_A	12.4301	11.8449	Not different
C6_03290W_A	12.4037	11.7864	Not different
C3_01160W_A	12.5607	12.9465	Not different
CR_02140W_A	12.4043	12.09	Not different
C4_02110W_A	12.3687	11.2732	Downregulated
C1_14430C_A	12.5708	11.8684	Not different
C2_01920C_A	12.3699	11.5268	Not different
C6_02810C_A	12.4447	11.9056	Not different
CR_06140W_A	12.5743	11.3457	Downregulated
C4_06250C_A	12.4838	12.2159	Not different
C2_01170C_A	12.4857	12.4405	Not different
C2_02490C_A	12.5508	11.6832	Not different
C4_04720W_A	12.5252	12.2116	Not different
C6_03800C_A	12.3335	11.7302	Not different
C3_07480W_A	12.4068	12.3666	Not different
C1_07780W_A	12.3869	12.1963	Not different
CR_09960C_A	12.52	12.1325	Not different
C6_00250W_A	12.567	11.3889	Downregulated
C3_02370C_A	12.5408	13.7681	Upregulated
C2_05780C_A	12.4819	12.1211	Not different
C7_02800W_A	12.5291	12.3193	Not different
CR_08370W_A	12.4725	12.4006	Not different
C4_00340W_A	12.3742	12.3374	Not different
C7_04270C_A	12.3957	11.8412	Not different
C1_08300W_A	12.5226	12.3546	Not different
C2_10480W_A	12.3068	12.0392	Not different
C1_03280W_A	12.3527	12.8219	Not different
C1_11930W_A	12.7188	12.5589	Not different
C4_02710C_A	12.3489	12.4682	Not different
CR_01770C_A	12.4806	12.0296	Not different
CR_04240C_A	12.5756	13.722	Upregulated
C2_01970C_A	12.5766	12.0906	Not different
C5_01760C_A	12.3719	12.1688	Not different
C2_04490W_A	12.3771	12.019	Not different
C2_07480W_A	12.4657	11.9265	Not different
C1_09450C_A	12.3092	12.3222	Not different
C3_00940W_A	12.4326	12.7928	Not different
C1_00310W_A	12.5093	11.2979	Downregulated
C2_01360C_A	12.4945	12.3397	Not different
C5_03150W_A	12.4819	11.8579	Not different
C3_04410C_A	12.3832	12.8782	Not different
C1_14530W_A	12.3129	12.0099	Not different
C2_01340W_A	12.2971	12.2071	Not different
C2_02920W_A	12.3986	12.2869	Not different
C2_04590C_A	12.2992	12.2568	Not different
C1_02430C_A	12.4248	13.0812	Not different
CR_03070W_A	12.34	11.6468	Not different
C1_07120W_A	12.4982	13.2554	Not different
CR_10270C_A	12.3264	12.5379	Not different
C5_02900W_A	12.3644	12.0411	Not different
C1_10470W_A	12.4091	12.5478	Not different
C1_13760W_A	12.4259	12.3075	Not different
C4_03050C_A	12.4178	11.4073	Downregulated
C1_07630W_A	12.3183	12.4713	Not different
C7_00700W_A	12.3216	11.8859	Not different
C2_04660C_A	12.4071	12.1882	Not different
C7_00050C_A	12.5794	12.4393	Not different
C2_01130W_A	12.4939	12.5943	Not different
C1_00870W_A	12.4003	11.4424	Not different
C1_07090C_A	12.4397	12.4482	Not different
C5_00260W_A	12.4172	13.0719	Not different
C3_06490W_A	12.3989	11.4429	Not different
CR_03600C_A	12.2364	12.1229	Not different
C1_02240W_A	12.4461	12.441	Not different
C1_04860W_A	12.3415	12.1682	Not different
CR_07520C_A	12.3335	12.6758	Not different
C3_04580C_A	12.4054	12.3613	Not different
C2_04930C_A	12.442	11.8064	Not different
C1_08020W_A	12.4331	12.0405	Not different
C4_01510W_A	12.3062	11.5052	Not different
CR_04130C_A	12.469	12.2319	Not different
C1_09350W_A	12.3568	12.5713	Not different
C6_03320W_A	12.1984	10.9077	Downregulated
C3_01030W_A	12.2784	12.6717	Not different
C1_08330C_A	12.2619	10.8859	Downregulated
C4_00460C_A	12.4161	11.9109	Not different
C5_05300W_A	12.2959	11.7545	Not different
C4_02550C_A	12.3797	12.6184	Not different
C1_05460W_A	12.3565	12.4146	Not different
C2_01320W_A	12.3877	12.3389	Not different
C1_00150C_A	12.4538	11.5865	Not different
C3_05530W_A	12.2809	12.796	Not different
C6_02140W_A	12.365	12.1087	Not different
C2_08140C_A	12.4411	13.0169	Not different
C2_09670C_A	12.2855	11.6938	Not different
C1_12850W_A	12.294	11.2224	Downregulated
CR_01730W_A	12.3293	11.4559	Not different
C1_06970C_A	12.3026	11.7807	Not different
CR_00080W_A	12.6221	14.0571	Upregulated
C2_03230C_A	12.2815	11.945	Not different
C1_01300W_A	12.2399	11.8183	Not different
C6_00260W_A	12.4598	12.183	Not different
CR_10060W_A	12.3255	11.7541	Not different
C6_01360W_A	12.2697	12.0264	Not different
C1_07390W_A	12.3192	12.3143	Not different
C2_07260C_A	12.3132	11.8008	Not different
CR_02620C_A	12.2217	12.4969	Not different
C4_00600C_A	12.5021	12.2282	Not different
C3_02600C_A	12.2632	12.334	Not different
C1_08100W_A	12.2638	12.9743	Not different
C7_00720W_A	12.3171	12.2685	Not different
C5_03090W_A	12.367	12.0102	Not different
C1_05410C_A	12.4082	11.2088	Downregulated
C3_07700W_A	12.2506	12.8346	Not different
C3_03490W_A	12.3603	11.3096	Downregulated
CR_02990C_A	12.2998	11.7006	Not different
C6_00160W_A	12.3231	11.3549	Not different
C6_00310W_A	12.4011	12.3402	Not different
C1_06130C_A	12.2579	12.4252	Not different
C4_02100C_A	12.2039	11.307	Not different
C3_07090W_A	12.2377	12.2617	Not different
CR_02970C_A	12.3362	12.0826	Not different
C3_05000W_A	12.1912	12.7323	Not different
C5_05470W_A	12.3418	12.215	Not different
C1_10180C_A	12.3586	12.2532	Not different
CR_01680C_A	12.3957	12.3689	Not different
C1_01130W_A	12.3001	11.742	Not different
C1_02640C_A	12.2156	12.5542	Not different
C3_01750C_A	12.3216	12.4137	Not different
C4_02280W_A	12.2582	12.581	Not different
CR_03620C_A	12.343	11.2737	Downregulated
C3_07740W_A	12.2424	12.7371	Not different
C4_06690C_A	12.3329	12.0174	Not different
C2_09580W_A	12.3952	12.464	Not different
CR_00200W_A	12.4105	12.8174	Not different
C5_04000W_A	12.1951	11.843	Not different
C2_03550C_A	12.3225	12.1011	Not different
CR_06860C_A	12.2475	11.7837	Not different
C1_13780W_A	12.4065	12.9206	Not different
C3_02940C_A	12.1919	13.2765	Upregulated
C3_01940C_A	12.0691	11.9653	Not different
C7_03600W_A	12.1948	12.1606	Not different
C3_02210C_A	12.2204	12.6741	Not different
CR_07620W_A	12.287	12.5574	Not different
C4_02300W_A	12.1896	11.6954	Not different
C6_02380W_A	12.3062	13.0706	Not different
C3_02590W_A	12.2281	12.5793	Not different
C5_00670C_A	12.3658	12.5277	Not different
C7_03960C_A	12.2694	11.7486	Not different
C4_00470C_A	12.2541	12.09	Not different
CR_07560W_A	12.321	12.3008	Not different
C7_00880C_A	12.386	11.5043	Not different
C1_05160C_A	12.2688	12.6118	Not different
CR_01490C_A	12.2481	12.2721	Not different
C1_13510C_A	12.1734	11.2721	Not different
C1_06480C_A	12.2085	12.1848	Not different
C2_06880C_A	12.1807	11.5689	Not different
C2_01470W_A	12.2821	12.0971	Not different
CR_10780C_A	12.2858	11.4506	Not different
C4_04440W_A	12.237	12.0829	Not different
C1_05950C_A	12.1902	10.8888	Downregulated
C2_07460W_A	12.2528	11.6832	Not different
C4_03790W_A	12.2469	12.3623	Not different
C2_06960W_A	12.2275	12.9746	Not different
C1_10120C_A	12.2519	12.1432	Not different
C5_05170W_A	12.2211	11.9508	Not different
C4_01970W_A	12.1727	11.6159	Not different
CR_05120W_A	12.3107	12.4232	Not different
C4_01410W_A	12.3192	12.1334	Not different
C6_02590C_A	12.1721	11.675	Not different
C1_12780W_A	12.1961	11.7051	Not different
CR_09320C_A	12.2772	12.5098	Not different
C1_03070C_A	12.302	12.2707	Not different
C2_05290C_A	12.2026	11.9371	Not different
C3_01210C_A	12.2007	12.2133	Not different
C2_00970C_A	12.2297	12.3801	Not different
C7_00940W_A	12.312	12.0959	Not different
C1_13330C_A	12.2065	11.9766	Not different
C2_09590C_A	12.2443	9.40441	Downregulated
C6_01180C_A	12.1082	11.0219	Downregulated
CR_06050W_A	12.1261	11.7738	Not different
C1_08210C_A	12.3338	13.0454	Not different
C7_00660W_A	12.398	10.0077	Downregulated
C2_06600W_A	12.2075	11.5654	Not different
C1_01470W_A	12.2772	12.4151	Not different
C7_02320W_A	12.121	12.0928	Not different
C3_07500W_A	12.2393	12.562	Not different
C3_01180C_A	12.4014	12.7408	Not different
C4_06230C_A	12.2262	12.1376	Not different
C6_00210W_A	12.2654	11.3738	Not different
C6_04540C_A	12.295	12.0551	Not different
C1_07250C_A	12.2297	11.6942	Not different
C3_01980C_A	12.2768	12.5603	Not different
C7_04010W_A	12.3495	12.1081	Not different
CR_01260W_A	12.1224	11.1773	Not different
CR_01660C_A	12.1991	12.1075	Not different
C3_04420W_A	12.2249	12.6624	Not different
C1_08990C_A	12.2641	12.3069	Not different
C1_01640W_A	12.1677	13.0843	Not different
C2_04360W_A	12.1909	11.9925	Not different
C2_00700W_A	12.3869	12.7329	Not different
C3_01390C_A	12.1237	12.5682	Not different
C4_06100W_A	12.2898	12.0829	Not different
CR_09600C_A	12.0935	11.9592	Not different
C6_02190C_A	12.2259	12.0714	Not different
C5_03820C_A	12.1767	12.3921	Not different
C6_04360C_A	12.1357	12.1755	Not different
C1_04200C_A	12.2236	11.8079	Not different
CR_05790C_A	12.4186	13.2592	Not different
C1_01010W_A	12.1724	12.6038	Not different
C1_05490C_A	12.1261	12.1723	Not different
CR_06950C_A	12.0045	10.6279	Downregulated
C1_14320C_A	12.1554	11.4678	Not different
CR_05310W_A	12.058	11.7432	Not different
C6_03180C_A	12.4195	11.9696	Not different
CR_06170W_A	12.1627	11.2786	Not different
C1_14170W_A	12.1435	12.3551	Not different
C1_13550C_A	12.2075	12.1253	Not different
C2_02310W_A	12.1984	12.5961	Not different
C4_02340W_A	12.1313	10.9998	Downregulated
C3_04290C_A	12.2885	12.5491	Not different
C1_04490W_A	12.1922	11.934	Not different
C2_08630C_A	12.1767	12.2477	Not different
CR_07350W_A	12.156	11.8887	Not different
C3_00630W_A	12.1134	12.2458	Not different
CR_02300C_A	12.1217	11.9703	Not different
C1_05680C_A	12.1085	11.6371	Not different
C1_11920W_A	12.1344	11.5725	Not different
C4_00370W_A	12.1889	11.7707	Not different
C2_00510W_A	12.1186	10.2386	Downregulated
C6_04470C_A	12.2998	11.7921	Not different
C2_00770W_A	12.078	11.2894	Not different
C2_04780W_A	12.2443	11.923	Not different
CR_06040W_A	12.3035	12.3768	Not different
C1_02860C_A	12.0998	11.9985	Not different
C1_00490C_A	12.1644	11.4749	Not different
C1_10800C_A	12.1196	11.3707	Not different
C5_04170W_A	12.245	11.6363	Not different
C3_06120C_A	12.2697	12.8807	Not different
C6_01350W_A	12.1784	11.7564	Not different
C5_05210W_A	12.1486	11.3233	Not different
CR_02460W_A	12.1621	11.2974	Not different
C2_01680C_A	12.2925	12.0557	Not different
CR_00440C_A	12.3092	12.0367	Not different
C2_03260W_A	12.0227	11.4186	Not different
C5_03760C_A	12.0773	12.0952	Not different
C3_07040C_A	12.0984	11.8172	Not different
C2_09780C_A	12.0709	11.9939	Not different
C7_03450C_A	12.0576	11.6248	Not different
C1_05240C_A	12.1717	11.9853	Not different
C6_01670W_A	12.2447	13.0052	Not different
C1_01450W_A	12.2626	12.632	Not different
C6_00390W_A	12.157	11.7179	Not different
C4_03130W_A	12.2272	11.8576	Not different
C4_03000C_A	12.1367	9.39047	Downregulated
C1_04760C_A	12.0872	12.6088	Not different
C2_07440C_A	12.2827	10.7738	Downregulated
C6_00570C_A	12.2845	12.2128	Not different
C3_03590W_A	12.2478	12.941	Not different
C1_01030W_A	12.1978	12.9698	Not different
CR_09070C_A	12.053	11.7521	Not different
C2_02730W_A	12.1401	11.863	Not different
C2_00470W_A	12.1384	12.4725	Not different
C1_01110C_A	12.1476	12.8926	Not different
C2_10260C_A	12.0995	11.4381	Not different
CR_00130C_A	12.1047	11.9021	Not different
C6_00600C_A	12.2017	12.6344	Not different
C3_06750W_A	12.0695	12.285	Not different
C3_01500C_A	12.1412	12.3397	Not different
C2_00390C_A	12.0935	11.9199	Not different
C1_08120W_A	12.1503	11.9886	Not different
C2_05680W_A	12.154	11.9334	Not different
C2_02260W_A	12.0602	11.6409	Not different
C5_00090C_A	12.1981	11.5786	Not different
C1_12340C_A	12.1483	12.4494	Not different
C7_04030C_A	12.0897	12.4746	Not different
C3_02950C_A	12.1466	12.9273	Not different
C5_00100C_A	12.058	10.4588	Downregulated
CR_10590W_A	12.1687	11.839	Not different
C1_12740W_A	11.9831	11.8213	Not different
C5_00730W_A	12.2998	11.4801	Not different
C2_09390W_A	12.0755	11.9696	Not different
C1_10780C_A	12.0421	11.5961	Not different
C3_04180W_A	12.1833	12.4866	Not different
C2_10530C_A	12.1863	11.7868	Not different
C7_03830C_A	12.1237	11.4439	Not different
C1_12250C_A	12.0967	12.2147	Not different
C1_10070C_A	12.0591	11.627	Not different
C1_01630W_A	12.0011	11.3186	Not different
C3_04990W_A	12.178	12.6499	Not different
C5_00560W_A	11.9694	11.5516	Not different
C1_13900C_A	12.2108	12.4945	Not different
C7_01490W_A	12.0326	11.6791	Not different
C1_09520C_A	12.1065	11.4564	Not different
C5_00630C_A	12.0623	11.828	Not different
C3_05030W_A	12.111	12.2466	Not different
C5_02180C_A	12.2469	12.0986	Not different
C3_06140W_A	12.0271	11.882	Not different
CR_08600C_A	12.1717	11.8976	Not different
C1_04700C_A	12.0991	10.7599	Downregulated
C5_05020C_A	11.9678	12.2966	Not different
C6_02740W_A	12.0201	12.2285	Not different
C1_01270W_A	12.1543	11.7482	Not different
C3_03890W_A	12.1303	12.2639	Not different
C4_02430W_A	12.0823	11.969	Not different
C5_03570W_A	12.1023	11.2319	Not different
C5_00130C_A	11.9747	12.0842	Not different
C4_00390W_A	12.1244	11.6605	Not different
CR_09860W_A	12.1994	12.0322	Not different
C4_03850W_A	11.9985	11.7818	Not different
C7_02330W_A	12.1364	12.1577	Not different
CR_02050C_A	12.182	12.3826	Not different
CR_01080W_A	12.134	11.9606	Not different
C1_10720C_A	12.183	11.8619	Not different
C3_00720W_A	12.3547	12.8159	Not different
C5_02650C_A	12.1813	11.867	Not different
CR_04480C_A	12.0918	10.6108	Downregulated
C1_10230C_A	12.068	11.7494	Not different
C7_01580W_A	12.078	11.5878	Not different
C5_01780W_A	12.0784	12.1397	Not different
C1_02250W_A	12.0773	10.7436	Downregulated
C4_00380W_A	12.1141	11.9626	Not different
C2_09150W_A	12.1019	11.643	Not different
C1_00380C_A	12.0851	12.0122	Not different
C4_04410C_A	12.1418	12.1283	Not different
C2_04130W_A	12.0851	11.7159	Not different
C6_01860C_A	12.0851	12.3833	Not different
C4_00330C_A	12.037	12.541	Not different
C1_05850W_A	12.0011	11.4147	Not different
C2_04020C_A	12.0414	11.5112	Not different
C1_13960W_A	12.0145	12.3138	Not different
C1_08240C_A	12.0501	11.1784	Not different
C6_01710C_A	12.201	12.2647	Not different
C7_04310C_A	12.2033	11.3677	Not different
C1_01750W_A	12.158	12.1489	Not different
C2_00370W_A	12.112	11.8652	Not different
C1_01100W_A	11.9697	11.828	Not different
C2_00730C_A	12.2091	11.9147	Not different
C1_06700W_A	12.1439	12.2051	Not different
C3_02760C_A	12.1554	12.4354	Not different
CR_03000C_A	12.0826	10.8412	Downregulated
CR_07020W_A	12.1075	12.7896	Not different
C6_01850W_A	12.113	11.7768	Not different
C1_07970C_A	12.0216	12.1075	Not different
C5_03400C_A	12.0493	11.6873	Not different
C7_03160W_A	12.0479	11.9375	Not different
C1_06020W_A	12.0064	11.7642	Not different
C2_00610C_A	11.9482	12.424	Not different
C3_07670W_A	11.9955	11.9299	Not different
CR_09310W_A	11.9891	11.9606	Not different
CR_05030W_A	12.0587	12.142	Not different
C2_07540W_A	12.0815	12.504	Not different
C1_01910W_A	12.054	12.4169	Not different
C4_01730C_A	11.9831	11.843	Not different
C3_06270C_A	11.8984	11.9889	Not different
C6_00780W_A	12.0716	11.9902	Not different
C7_03320C_A	12.0242	11.8916	Not different
C3_07230W_A	12.0461	12.6783	Not different
C6_00200C_A	12.0308	11.6556	Not different
C5_05110C_A	12.0134	11.6526	Not different
C7_03390C_A	12.0056	11.8827	Not different
C2_02320C_A	11.9505	11.7191	Not different
C5_00490C_A	11.92	11.6248	Not different
C5_04060C_A	11.9884	11.7404	Not different
C6_01980C_A	12.0805	12.5245	Not different
C4_06850C_A	12.0974	12.5971	Not different
C1_06400C_A	12.159	12.0992	Not different
C5_02530W_A	11.9016	12.0376	Not different
CR_08040W_A	11.9458	11.3149	Not different
C2_07350W_A	12.1103	11.7314	Not different
C2_10110W_A	12.0242	13.0519	Upregulated
C6_01740C_A	12.0712	12.2832	Not different
C4_07200C_A	12.0851	12.0529	Not different
C7_00300W_A	12.0071	11.5431	Not different
C1_00890W_A	11.9682	11.606	Not different
C5_00570W_A	12.0641	11.8848	Not different
CR_09440C_A	12.0333	11.5729	Not different
C6_00950C_A	12.0594	11.6422	Not different
C3_03560W_A	12.0282	12.4235	Not different
C7_03020C_A	11.9337	11.6783	Not different
C4_04510W_A	12.1051	11.8053	Not different
C3_00830C_A	11.9736	12.495	Not different
C2_05170W_A	12.0403	11.6163	Not different
C2_07940C_A	11.9286	11.5489	Not different
CR_02530W_A	12.155	13.3694	Upregulated
C6_04350C_A	12.3038	12.226	Not different
C6_00670W_A	12.0352	11.8873	Not different
C1_01830C_A	12.0179	11.5561	Not different
C1_13170C_A	12.1155	11.9137	Not different
CR_00070W_A	12.2722	11.8979	Not different
C3_06020W_A	11.9895	12.6443	Not different
C3_05560W_A	11.9016	12.5801	Not different
C3_00470W_A	11.9981	12.3254	Not different
C2_07660W_A	11.9172	11.6013	Not different
C2_06110W_A	11.8676	11.3672	Not different
C7_02970W_A	12.0522	11.9612	Not different
CR_00570W_A	12.0271	12.254	Not different
C6_00760W_A	11.9416	11.7226	Not different
CR_03900W_A	12.0414	11.8901	Not different
CR_01000C_A	12.0493	11.9077	Not different
C1_05780W_A	12.1189	12.0717	Not different
C1_03790C_A	12.0275	13.7775	Upregulated
C2_03500W_A	12.0026	12.2875	Not different
C3_04920C_A	11.9732	12.1723	Not different
C5_04360C_A	11.9341	10.5944	Downregulated
C1_11760C_A	11.8737	11.9157	Not different
CR_01180W_A	11.8398	11.4649	Not different
C1_08160W_A	11.9709	11.8038	Not different
C1_00130C_A	12.0995	11.9189	Not different
C3_04490W_A	11.9667	12.603	Not different
CR_02670C_A	12.1607	11.4215	Not different
C1_09070W_A	11.8684	11.684	Not different
C7_03420C_A	11.9144	11.0373	Not different
C5_00880C_A	11.898	11.1686	Not different
C1_04780C_A	11.9369	11.8587	Not different
C1_10700C_A	11.8786	11.473	Not different
CR_01210C_A	12.0769	11.7396	Not different
C3_00570C_A	12.0227	12.7365	Not different
C1_10440W_A	11.9605	11.6672	Not different
C1_03300C_A	12.0326	12.1559	Not different
C7_00010C_A	12.1584	11.7814	Not different
CR_03150W_A	11.9	11.7014	Not different
C1_13280C_A	11.9609	12.1559	Not different
C2_05910W_A	12.0127	12.0245	Not different
CR_08700C_A	11.8729	11.1813	Not different
C3_06470W_A	12.1506	11.7063	Not different
C4_00650W_A	11.9172	12.1509	Not different
C2_09820W_A	12.0508	10.2759	Downregulated
C3_03720W_A	11.9517	11.7171	Not different
C1_10270C_A	11.9318	11.7039	Not different
C1_13110C_A	12.0727	12.5351	Not different
C4_01200C_A	11.9663	12.4571	Not different
CR_05650W_A	11.8944	11.5249	Not different
CR_02430C_A	11.9575	11.9497	Not different
C3_06230W_A	12.0598	12.586	Not different
C1_04020C_A	11.8944	11.1963	Not different
C3_02430W_A	11.9474	12.5574	Not different
C4_03800C_A	11.9423	11.9565	Not different
C1_02880C_A	12.0175	12.5442	Not different
CR_03460W_A	11.8988	11.308	Not different
C7_01660C_A	12.0417	12.1729	Not different
C1_07700C_A	11.933	12.4616	Not different
C4_07240W_A	12.0602	11.763	Not different
C5_01420W_A	11.938	10.3155	Downregulated
C3_06250W_A	11.8394	12.1096	Not different
C3_07170C_A	11.9918	12.7782	Not different
C3_04560W_A	12.1641	13.778	Upregulated
C5_02700W_A	11.9493	11.7514	Not different
CR_06780W_A	11.8717	11.5462	Not different
CR_01390W_A	12.0157	12.1379	Not different
C1_06820W_A	11.9717	11.5516	Not different
CR_10010C_A	12.0744	12.3801	Not different
C7_01340W_A	11.9505	11.7226	Not different
C1_04670W_A	11.8948	11.5358	Not different
C3_01600W_A	12.0105	12.1256	Not different
C2_06870C_A	11.9341	9.73106	Downregulated
C1_05750C_A	11.9659	11.6942	Not different
CR_08550W_A	11.952	12.0623	Not different
C2_02450C_A	12.0587	13.0909	Upregulated
C3_03880C_A	11.9349	12.0998	Not different
CR_05990C_A	12.1784	11.8634	Not different
C4_07090C_A	11.9489	12.4817	Not different
C3_06710W_A	11.9955	12.4405	Not different
C3_04760C_A	12.0238	13.1128	Upregulated
C2_05760C_A	11.9092	12.102	Not different
C7_04050W_A	11.9816	11.8862	Not different
CR_09510C_A	11.8268	12.0655	Not different
C2_05820W_A	11.7822	10.2297	Downregulated
C4_07230C_A	12.3092	12.0854	Not different
C2_08850C_A	11.9345	10.8958	Downregulated
C2_09620W_A	11.9243	11.822	Not different
C5_04570C_A	12.0659	13.3968	Upregulated
C1_08230C_A	12.0049	10.5654	Downregulated
C4_05550C_A	11.8539	11.9826	Not different
C5_01070C_A	12.0634	10.2727	Downregulated
CR_05970C_A	12.0245	11.973	Not different
C1_04600C_A	11.977	12.5077	Not different
C4_01440W_A	11.836	12.029	Not different
CR_08930C_A	11.8581	11.6933	Not different
CR_07390C_A	12.009	12.3322	Not different
C3_05360C_A	11.916	12.0683	Not different
C3_04130W_A	11.8452	11.8023	Not different
C1_14080W_A	12.0791	12.7745	Not different
C3_03510C_A	11.9128	11.9042	Not different
CR_09370W_A	12.0289	12.7915	Not different
C5_00170W_A	11.9625	11.8518	Not different
C1_09380W_A	11.7514	11.5399	Not different
C1_04000C_A	11.8502	11.1157	Not different
C7_01320W_A	11.9326	11.3944	Not different
CR_04580W_A	11.9921	12.2187	Not different
C2_05580W_A	11.9808	11.7345	Not different
C1_09360C_A	11.896	12.1346	Not different
C6_03300C_A	11.8498	11.8098	Not different
C1_07140C_A	11.9793	12.6034	Not different
CR_05530C_A	12.0289	11.9726	Not different
C1_05140W_A	12.0847	10.2219	Downregulated
CR_01300W_A	11.7514	12.0648	Not different
C4_07250C_A	11.8717	11.5887	Not different
C2_10760C_A	11.9918	12.063	Not different
CR_03740C_A	11.7769	11.7676	Not different
C5_02580W_A	11.773	11.5764	Not different
CR_02850C_A	11.9621	11.6684	Not different
C1_00640C_A	12.1261	12.6661	Not different
C5_00980W_A	11.8012	11.7022	Not different
C2_08270C_A	11.9544	11.686	Not different
C4_00310C_A	11.9505	11.9423	Not different
C6_03080C_A	11.8046	12.5112	Not different
C5_01850C_A	11.954	11.8441	Not different
C1_13640W_A	11.9555	11.6282	Not different
C6_02430W_A	11.9891	11.4735	Not different
C5_05310W_A	11.8655	12.2031	Not different
C7_00570W_A	12.058	13.6204	Upregulated
C2_03390C_A	11.9478	11.982	Not different
C4_03080W_A	11.8106	11.7618	Not different
CR_06570C_A	11.844	11.0721	Not different
C1_09860C_A	11.8839	11.5268	Not different
C3_01360C_A	11.902	12.3376	Not different
C1_13270W_A	11.7695	10.8951	Not different
C3_02500W_A	11.817	12.8423	Upregulated
C7_04090C_A	11.9705	10.7381	Downregulated
C1_09020W_A	11.7835	12.5361	Not different
C1_03600W_A	11.7878	11.9361	Not different
C5_02480W_A	11.9032	11.6783	Not different
C1_01540W_A	11.8272	11.4371	Not different
C3_06110C_A	12.003	12.0801	Not different
C3_07220C_A	11.7835	13.045	Upregulated
C5_02560C_A	11.8498	11.2419	Not different
C3_01510W_A	11.9458	12.1166	Not different
C4_01190W_A	11.959	11.5896	Not different
C1_02230W_A	12.0311	12.0891	Not different
C2_04380C_A	11.8213	11.8386	Not different
CR_04070W_A	11.7804	11.2667	Not different
C4_02000C_A	11.9012	12.312	Not different
CR_02810W_A	11.87	11.0633	Not different
C7_02300W_A	11.8145	11.5733	Not different
CR_03250C_A	11.9621	11.9504	Not different
C7_00410C_A	12.0286	11.9981	Not different
CR_10660W_A	11.8928	12.0983	Not different
CR_09590W_A	11.7496	11.3032	Not different
C1_01600W_A	11.8556	12.3487	Not different
C4_01290W_A	11.916	11.2486	Not different
CR_00850C_A	11.8814	11.5295	Not different
C1_08760W_A	11.7357	11.5834	Not different
C5_02190C_A	11.8102	12.1653	Not different
C5_02340C_A	12.0319	12.0792	Not different
CR_09230C_A	11.8136	11.6889	Not different
C2_07470W_A	11.8647	11.8228	Not different
C5_01410C_A	11.8729	11.7055	Not different
C4_04660C_A	11.9439	11.9463	Not different
CR_02950C_A	11.8029	12.0494	Not different
C1_04540C_A	11.7598	11.6852	Not different
C2_05030C_A	11.8581	12.094	Not different
C5_00900C_A	11.8029	12.2987	Not different
CR_00110W_A	11.8335	11.7238	Not different
C5_00820W_A	11.9184	12.3559	Not different
C6_03430C_A	11.7531	11.8561	Not different
CR_09990W_A	11.952	11.7959	Not different
C3_02240C_A	11.9152	12.0674	Not different
C1_08670W_A	11.8153	11.5672	Not different
C2_09680W_A	11.7424	10.7944	Not different
C5_04680W_A	11.7809	11.2628	Not different
C4_04460C_A	11.9455	12.1833	Not different
C1_00960C_A	11.8639	11.7215	Not different
CR_09240C_A	11.7112	11.7556	Not different
C1_08080C_A	11.7339	11.9007	Not different
C3_00330W_A	11.9732	12.7097	Not different
C1_09200W_A	11.8343	11.5103	Not different
C1_04810W_A	11.9088	11.7498	Not different
C1_13120C_A	11.7002	11.4127	Not different
C1_14350W_A	11.7393	11.1877	Not different
C5_03680W_A	11.8696	11.4429	Not different
C1_03460C_A	11.8904	10.8442	Downregulated
C1_13610C_A	12.0082	11.7183	Not different
C4_03890W_A	11.6788	11.6248	Not different
C6_04580W_A	11.8729	11.5295	Not different
C5_00330C_A	11.7852	11.317	Not different
C4_05090C_A	11.7761	11.4429	Not different
CR_07780W_A	11.8123	11.3503	Not different
CR_07460C_A	11.8204	12.0399	Not different
C5_02490C_A	11.8268	12.4537	Not different
C4_01080W_A	11.9207	11.9137	Not different
C2_04720C_A	11.8352	11.1738	Not different
C7_03840W_A	11.6844	12.1352	Not different
C5_00640C_A	11.7917	12.0702	Not different
C7_03120W_A	11.8568	12.329	Not different
C1_14100W_A	11.8055	11.4973	Not different
C2_06860W_A	11.7267	11.7286	Not different
C7_00980W_A	11.8968	11.4932	Not different
C1_06630W_A	11.8089	11.421	Not different
CR_08200C_A	11.929	12.0396	Not different
C6_01590W_A	11.9439	12.0399	Not different
C1_12430W_A	11.7835	11.3651	Not different
CR_08490W_A	12.0921	13.2031	Upregulated
C3_00640W_A	11.7991	12.2313	Not different
C3_03180C_A	11.7249	11.9354	Not different
C1_00120C_A	11.8725	11.5386	Not different
C1_11210C_A	11.9032	11.6539	Not different
C1_07590C_A	11.7843	11.8572	Not different
C6_04220C_A	11.7053	10.8795	Not different
C1_14590C_A	11.8132	11.2043	Not different
C3_06970W_A	11.7447	12.4744	Not different
C1_06110C_A	11.683	11.8677	Not different
C2_07120W_A	11.7611	11.4468	Not different
C6_02880W_A	11.8089	12.2915	Not different
C1_01400C_A	11.7965	11.3306	Not different
C2_10680W_A	11.8314	11.2469	Not different
C1_07190W_A	11.9493	11.8891	Not different
C6_02630C_A	11.8597	11.7553	Not different
C7_01720W_A	11.6619	11.098	Not different
C6_03620C_A	11.8042	11.265	Not different
CR_03910C_A	11.9243	11.5286	Not different
CR_01320C_A	11.9124	11.3133	Not different
C4_04350W_A	11.66	11.4352	Not different
C3_03300C_A	11.9004	12.2761	Not different
C4_01100C_A	11.9259	11.2302	Not different
C2_07090C_A	11.8343	11.552	Not different
C4_07100C_A	11.8427	12.0386	Not different
CR_07180W_A	11.823	11.8937	Not different
C5_01650C_A	11.7294	11.4171	Not different
C6_03100W_A	11.8465	12.1379	Not different
CR_06640C_A	11.7673	11.4147	Not different
C1_14220C_A	11.8597	12.4927	Not different
CR_08450C_A	11.9455	11.9046	Not different
C5_00580W_A	11.7761	11.3212	Not different
[truncated: 3,761 more rows]

## Sheet: NaiveVsL2_YPD_2FC_DEG
gene	A10_YPD	E2_YPD	DEG
C3_06870W_A	20.9425	19.8652	Downregulated
C4_06570C_A	20.3063	18.8118	Downregulated
C4_01750C_A	20.0213	17.9798	Downregulated
C1_08500C_A	19.9492	18.2446	Downregulated
C2_05460W_A	19.8567	17.6315	Downregulated
C5_05050W_A	19.6712	18.4867	Downregulated
C2_03270W_A	18.9458	16.8582	Downregulated
C4_02370C_A	18.7175	18.0026	Not different
C6_00750C_A	18.5297	16.6041	Downregulated
CR_04510W_A	18.5269	16.4095	Downregulated
C7_01800C_A	18.5251	16.7755	Downregulated
C5_04810W_A	18.1278	16.5023	Downregulated
C3_04060C_A	17.8928	16.4041	Downregulated
CR_08090W_A	18.0592	17.8483	Not different
C2_01000W_A	18.0942	17.0665	Downregulated
C2_03100W_A	17.9151	17.6493	Not different
C4_02390W_A	17.8622	16.639	Downregulated
C3_07440W_A	17.5531	16.5889	Not different
C1_08380W_A	17.632	17.3725	Not different
C1_08360C_A	17.6749	16.0702	Downregulated
CR_06340C_A	17.6565	15.7956	Downregulated
C1_06580W_A	17.4389	17.1049	Not different
C1_00180W_A	17.4346	17.3218	Not different
C2_05700W_A	17.2586	14.9833	Downregulated
C1_09190C_A	17.1288	14.7444	Downregulated
C3_00320W_A	17.0761	15.379	Downregulated
C1_03090W_A	17.1013	17.0815	Not different
C1_03020C_A	17.0652	16.8964	Not different
C2_08370C_A	16.9709	16.8687	Not different
C1_11060C_A	16.9659	16.7771	Not different
C1_03110W_A	16.8936	16.8893	Not different
C1_08590C_A	16.8624	14.66	Downregulated
C3_05240C_A	16.8382	17.5545	Not different
C3_05370C_A	16.843	17.3219	Not different
C5_01580C_A	17.0011	17.8797	Not different
C1_14110C_A	16.9156	16.9313	Not different
C3_04670C_A	16.8744	17.0661	Not different
C7_02030W_A	16.926	16.5359	Not different
C3_01490W_A	16.7784	17.0129	Not different
C2_03810C_A	16.8363	16.4597	Not different
C2_07570W_A	16.771	14.0981	Downregulated
C6_01970C_A	16.7519	16.6333	Not different
C2_09430W_A	16.7547	16.8435	Not different
C3_04500C_A	16.73	17.0431	Not different
CR_08150W_A	16.6342	16.689	Not different
C1_03220C_A	16.6724	15.9391	Not different
C2_08290C_A	16.5724	15.519	Downregulated
C1_02460W_A	16.7046	16.6643	Not different
C2_10620W_A	16.6628	16.5101	Not different
C2_01610C_A	16.6727	16.275	Not different
C3_04830C_A	16.7125	15.824	Not different
C2_05610C_A	16.5866	16.5716	Not different
C1_06450C_A	16.5821	16.4689	Not different
CR_00780C_A	16.5926	14.7655	Downregulated
C7_01790C_A	16.5817	16.7946	Not different
C1_05720W_A	16.635	16.5755	Not different
C2_02860W_A	16.5332	14.0806	Downregulated
C1_01350C_A	16.6245	16.704	Not different
C5_03540C_A	16.5693	16.7722	Not different
C5_00190C_A	16.5484	15.8528	Not different
C4_01270W_A	16.4569	16.6682	Not different
C1_13860C_A	16.6251	15.6766	Not different
C3_07950C_A	16.5567	16.368	Not different
C2_08040C_A	16.4729	16.2968	Not different
C3_04810C_A	16.5004	16.722	Not different
C7_00960W_A	16.4491	16.3545	Not different
C4_00270W_A	16.5067	16.7786	Not different
C1_04300C_A	16.4982	16.9126	Not different
CR_03030C_A	16.411	16.347	Not different
C2_03820C_A	16.3995	16.4262	Not different
C7_01250W_A	16.404	16.6621	Not different
C1_03030W_A	16.4237	16.2071	Not different
C5_03070W_A	16.4245	16.8946	Not different
C6_01610W_A	16.3327	16.2431	Not different
CR_04100C_A	16.2836	16.4789	Not different
C2_08590W_A	16.4377	15.4408	Not different
CR_10840C_A	16.3146	13.5026	Downregulated
CR_07790C_A	16.0912	16.1687	Not different
C1_08790W_A	16.1817	15.0551	Downregulated
C3_02110W_A	16.148	16.8313	Not different
C1_10870W_A	16.1907	16.0588	Not different
C1_13700W_A	16.193	15.5903	Not different
C6_02240C_A	16.0993	16.2776	Not different
C3_05100C_A	16.1821	16.4429	Not different
C2_03010C_A	16.0505	15.2462	Not different
C3_04960W_A	16.0542	16.7061	Not different
C3_05200W_A	16.0963	16.057	Not different
C1_12390C_A	16.1006	16.0492	Not different
C3_00090W_A	16.1982	16.3103	Not different
C4_04890C_A	16.0162	15.8899	Not different
CR_05340C_A	16.0112	13.8668	Downregulated
C4_07180W_A	16.0966	16.1233	Not different
CR_10250C_A	16.0693	15.3958	Not different
C1_13620W_A	16.0999	15.128	Not different
C1_04400C_A	16.1172	15.4334	Not different
C1_03380W_A	16.0678	14.5477	Downregulated
C1_09250W_A	15.9437	14.6006	Downregulated
C1_03190C_A	16.0047	15.6718	Not different
C2_05710C_A	15.9515	16.0635	Not different
C7_01650W_A	15.906	14.0318	Downregulated
C1_03010W_A	15.9116	15.862	Not different
CR_04090C_A	15.9944	15.4009	Not different
C1_01480C_A	15.9595	15.9812	Not different
C2_10690W_A	15.9773	12.7897	Downregulated
CR_00860C_A	15.8285	15.842	Not different
C2_04600C_A	15.8425	16.0916	Not different
C4_01520C_A	15.8172	15.7969	Not different
C1_09720W_A	15.8942	13.6627	Downregulated
CR_03720W_A	15.8522	14.5754	Downregulated
C1_04100C_A	15.7977	15.3122	Not different
CR_07630C_A	15.7547	15.8475	Not different
C1_00060W_A	15.9881	14.7275	Downregulated
C1_08070W_A	15.8345	13.5916	Downregulated
C3_01540W_A	15.689	11.9959	Downregulated
C6_03760C_A	15.7155	15.155	Not different
C2_05410W_A	15.6865	15.7846	Not different
C7_00990W_A	15.7638	15.5698	Not different
C1_13480W_A	15.7887	11.995	Downregulated
C4_04900W_A	15.5903	15.6306	Not different
CR_00640W_A	15.6626	14.4468	Downregulated
C4_04480C_A	15.6406	15.6802	Not different
C1_13050W_A	15.5852	15.8189	Not different
C1_04680W_A	15.5804	13.8077	Downregulated
C1_04610W_A	15.7069	16.1833	Not different
C6_01700W_A	15.5949	15.5851	Not different
C1_08320W_A	15.6826	14.5694	Downregulated
C7_02380C_A	15.5517	14.7706	Not different
C3_02470C_A	15.4646	15.5803	Not different
C2_07380W_A	15.7262	15.7364	Not different
C1_13140C_A	15.623	16.7607	Upregulated
C2_08810C_A	15.5515	14.8835	Not different
C2_00210W_A	15.5369	15.6203	Not different
C1_10390C_A	15.47	15.5966	Not different
CR_01620C_A	15.656	15.3954	Not different
CR_07150W_A	15.5622	11.9153	Downregulated
C3_07410C_A	15.5374	16.2043	Not different
C1_04290C_A	15.5348	15.0419	Not different
C5_03900W_A	15.4679	15.2001	Not different
C7_01640W_A	15.5351	15.0457	Not different
C3_06700C_A	15.4877	15.4296	Not different
C6_02010C_A	15.3285	13.3848	Downregulated
C2_03160C_A	15.3757	14.1901	Downregulated
C5_00660C_A	15.3578	14.4139	Not different
C3_07310C_A	15.5564	14.5569	Not different
C3_03900C_A	15.4194	15.6077	Not different
C4_02410C_A	15.3158	10.9627	Downregulated
C1_10790W_A	15.4619	14.7768	Not different
C6_02070C_A	15.3083	15.4169	Not different
C1_01360C_A	15.467	12.9159	Downregulated
C1_11650W_A	15.3353	15.0195	Not different
C1_03370W_A	15.51	15.7415	Not different
C4_01900C_A	15.3923	14.8326	Not different
C7_02600C_A	15.2968	11.7812	Downregulated
C3_04090W_A	15.328	14.9031	Not different
C3_06010W_A	15.2213	15.5554	Not different
C6_01910W_A	15.2264	14.6062	Not different
C1_06890C_A	15.2043	15.2738	Not different
C3_00550C_A	15.3841	13.9859	Downregulated
C1_11360W_A	15.2567	15.1426	Not different
C4_00160C_A	15.3157	13.1427	Downregulated
C2_01120W_A	15.3606	14.9979	Not different
CR_04810W_A	15.1612	15.6198	Not different
C1_14290C_A	15.3725	14.54	Not different
C5_04300C_A	15.276	15.2408	Not different
C3_07270C_A	15.2228	15.0761	Not different
C3_03420C_A	15.2343	15.9105	Not different
CR_00910W_A	15.1613	14.1629	Not different
C3_04550C_A	15.2119	13.9144	Downregulated
C3_07150C_A	15.0913	15.7441	Not different
C6_00330C_A	15.2762	14.503	Not different
CR_10680W_A	15.4077	14.7691	Not different
C4_07110C_A	15.226	15.0375	Not different
C7_00930W_A	15.2261	12.569	Downregulated
C1_13680C_A	15.0982	14.3853	Not different
CR_02820W_A	15.0382	13.1579	Downregulated
CR_05050W_A	15.1193	15.1295	Not different
C2_00250W_A	15.082	13.176	Downregulated
C5_05440C_A	15.2837	14.0204	Downregulated
CR_04590C_A	15.0255	13.1743	Downregulated
CR_08210C_A	15.1691	16.4752	Upregulated
C3_02480C_A	15.0038	13.5335	Downregulated
C1_04260W_A	15.0599	14.7856	Not different
C5_05230C_A	15.0307	15.7853	Not different
C4_01050C_A	15.0228	15.1349	Not different
C6_00870C_A	15.0451	15.2141	Not different
C4_04590W_A	15.0289	13.2337	Downregulated
C2_03180C_A	15.0034	14.2275	Not different
C3_06500W_A	15.0746	14.9237	Not different
CR_05670C_A	15.0417	14.1395	Not different
C2_10030C_A	15.1349	14.5296	Not different
C5_04130C_A	15.3061	16.1841	Not different
C2_01020W_A	15.1619	13.9256	Downregulated
C2_06310C_A	14.9523	14.839	Not different
C1_04890W_A	14.9765	14.9796	Not different
C2_09060C_A	15.0422	15.5197	Not different
CR_10850C_A	15.0119	14.526	Not different
C1_11200W_A	14.9615	11.4703	Downregulated
C5_05480W_A	14.9709	14.1329	Not different
C3_04680W_A	15.0059	15.4843	Not different
C5_03510C_A	14.996	13.3373	Downregulated
CR_01760C_A	14.922	14.9982	Not different
CR_04210C_A	15.0297	14.5145	Not different
C2_03380W_A	15.1409	14.2775	Not different
CR_07400C_A	15.0027	14.6877	Not different
C1_06900C_A	14.9477	14.1836	Not different
C1_11860W_A	14.9816	14.3097	Not different
C1_05300C_A	14.8894	13.3167	Downregulated
C3_03800W_A	15.0033	14.4619	Not different
C4_04700W_A	14.9685	15.3363	Not different
C6_04380W_A	15.0455	11.73	Downregulated
C1_10840C_A	14.9156	14.6168	Not different
C7_02840C_A	14.9204	13.6669	Downregulated
C1_08740C_A	14.9952	14.1652	Not different
C4_01700C_A	14.779	14.3683	Not different
C1_00210C_A	14.9032	13.6123	Downregulated
CR_08460W_A	14.7682	14.1154	Not different
C6_04520W_A	15.0225	14.9775	Not different
C3_01810C_A	14.921	14.7243	Not different
C7_03670W_A	14.8269	14.8507	Not different
C3_04950W_A	14.8486	15.1237	Not different
C2_04950C_A	14.8851	14.7812	Not different
C1_12050W_A	14.8619	14.4654	Not different
C2_09720W_A	14.9309	14.7059	Not different
CR_04660C_A	14.7972	13.8189	Not different
C3_00460W_A	14.847	15.5688	Not different
C4_05460C_A	14.768	13.2498	Downregulated
C1_06100C_A	14.8291	15.5608	Not different
C1_04170C_A	14.7812	14.6848	Not different
CR_01690C_A	14.8845	14.8979	Not different
C1_06930W_A	15.0431	14.3954	Not different
C4_01530C_A	14.7534	14.0071	Not different
C1_03510C_A	14.8235	12.4205	Downregulated
CR_08810W_A	14.8719	16.3783	Upregulated
C1_06460C_A	14.7526	14.9575	Not different
C2_02930C_A	14.7682	13.2114	Downregulated
CR_08360C_A	14.7534	14.2279	Not different
C7_03250C_A	14.8002	14.4921	Not different
C3_00850C_A	14.9342	13.7739	Downregulated
C1_09640W_A	14.7598	14.0231	Not different
C1_00070W_A	14.8787	14.1523	Not different
CR_09970W_A	14.7521	14.4951	Not different
C2_06810C_A	14.7349	15.0126	Not different
CR_09330C_A	14.7544	13.573	Downregulated
C1_08460C_A	14.8303	13.0673	Downregulated
C1_11660W_A	14.7389	13.2401	Downregulated
C5_02380W_A	14.7164	12.5331	Downregulated
C1_12360C_A	14.6199	13.2448	Downregulated
C1_10450W_A	14.7127	13.8266	Not different
CR_05390W_A	14.7464	13.9329	Not different
C4_02270C_A	14.714	14.5868	Not different
C2_06570C_A	14.6204	12.3202	Downregulated
CR_08250C_A	14.7954	12.8945	Downregulated
C2_06730W_A	14.7233	14.3651	Not different
C1_08090C_A	14.902	14.862	Not different
C5_03280W_A	14.5961	15.2098	Not different
C4_02940W_A	14.8424	13.1846	Downregulated
C1_07870C_A	14.6367	13.761	Not different
C7_02610C_A	14.5538	11.1155	Downregulated
C1_06470W_A	14.6289	14.7204	Not different
C1_00590W_A	14.8094	14.8988	Not different
C1_08350C_A	14.5674	14.7955	Not different
C1_14440C_A	14.7693	13.759	Downregulated
C6_00290W_A	14.812	12.7946	Downregulated
CR_09160C_A	14.5889	14.243	Not different
C5_01910W_A	14.6432	14.9389	Not different
C4_00220C_A	14.6541	14.1598	Not different
C7_03920C_A	14.6367	14.4595	Not different
C3_03410C_A	14.7986	12.5813	Downregulated
CR_06150C_A	14.6576	14.2816	Not different
C5_00110C_A	14.7599	15.3651	Not different
CR_02070C_A	14.7061	11.4122	Downregulated
C6_02120W_A	14.6291	14.2842	Not different
CR_05780W_A	14.619	14.2349	Not different
C1_10820C_A	14.5332	13.1829	Downregulated
C2_08760C_A	14.8075	14.8294	Not different
CR_08300C_A	14.6594	13.0802	Downregulated
C5_05410C_A	14.7273	14.4526	Not different
C4_02440C_A	14.6159	13.741	Not different
C1_00220W_A	14.7821	13.9614	Not different
C7_04230W_A	14.8197	14.6427	Not different
C1_14280C_A	14.6458	14.037	Not different
C1_02120C_A	14.6031	15.9992	Upregulated
C1_01370C_A	14.4449	14.5069	Not different
C2_08300C_A	14.4959	13.0721	Downregulated
C2_10560C_A	14.5793	14.6459	Not different
C4_04150C_A	14.5667	14.4412	Not different
C1_14500C_A	14.5971	13.6493	Not different
CR_03170W_A	14.6113	14.2734	Not different
C5_04590C_A	14.5444	14.9124	Not different
C1_05110C_A	14.6062	14.5161	Not different
CR_01470W_A	14.4525	10.5573	Downregulated
C7_00620W_A	14.5627	14.3963	Not different
C2_04310W_A	14.5067	13.8225	Not different
C5_00590W_A	14.5234	16.9308	Upregulated
C6_00650C_A	14.4081	14.8147	Not different
CR_10360C_A	14.4449	13.3202	Downregulated
C5_00370W_A	14.5372	14.2124	Not different
C1_09630W_A	14.5149	14.9502	Not different
C1_09680W_A	14.576	14.4262	Not different
C1_05290W_A	14.5503	14.5485	Not different
C1_10040W_A	14.4454	13.4894	Not different
CR_01440C_A	14.4663	15.0649	Not different
CR_02570C_A	14.3898	12.6181	Downregulated
C1_04180W_A	14.2962	14.4193	Not different
C2_06640C_A	14.4821	14.7969	Not different
CR_09880W_A	14.6945	13.9418	Not different
C1_11670W_A	14.5341	11.8958	Downregulated
C2_06100W_A	14.5158	13.2805	Downregulated
C4_05140C_A	14.4403	10.9877	Downregulated
C3_04140C_A	14.3906	14.2674	Not different
C4_05670W_A	14.4766	13.8497	Not different
C4_04870C_A	14.5248	13.9805	Not different
C7_00340C_A	14.486	13.2529	Downregulated
C1_04240C_A	14.3603	14.4248	Not different
C5_02940C_A	14.553	14.3748	Not different
C5_00930C_A	14.3878	12.6975	Downregulated
C3_07020W_A	14.7598	14.0812	Not different
C7_04300W_A	14.6167	14.1072	Not different
C1_08980C_A	14.3623	13.3824	Not different
C7_03660C_A	14.4045	14.5439	Not different
C5_02860C_A	14.4157	12.4836	Downregulated
C4_06610C_A	14.487	14.5909	Not different
C1_04320W_A	14.2903	12.8419	Downregulated
CR_06800C_A	14.2908	14.2886	Not different
C6_00720C_A	14.4685	13.59	Not different
CR_03060W_A	14.4128	14.3262	Not different
C7_00350C_A	14.3858	13.2174	Downregulated
C1_12770W_A	14.4079	14.6872	Not different
C7_00440C_A	14.4016	13.8183	Not different
C7_00710W_A	14.3412	14.237	Not different
CR_04190W_A	14.4062	13.1442	Downregulated
C4_03280W_A	14.2983	13.9661	Not different
C3_04430W_A	14.3717	15.033	Not different
CR_10350C_A	14.2477	13.6727	Not different
C7_01920W_A	14.419	13.2738	Downregulated
CR_10160W_A	14.3797	14.2402	Not different
C3_06440W_A	14.4769	14.1913	Not different
CR_09270C_A	14.3166	12.5452	Downregulated
C2_04870C_A	14.4315	13.9186	Not different
C4_01360W_A	14.2912	13.6156	Not different
C2_07490W_A	14.3673	13.0332	Downregulated
C4_05690W_A	14.3247	13.779	Not different
CR_10070C_A	14.2395	13.1996	Downregulated
C2_01640W_A	14.496	13.3428	Downregulated
C6_00820W_A	14.3708	13.4321	Not different
C2_10550C_A	14.4249	14.3553	Not different
C1_06600W_A	14.308	13.3923	Not different
CR_05720W_A	14.2332	11.9896	Downregulated
C1_13940W_A	14.3674	13.806	Not different
C4_05300W_A	14.2799	12.2309	Downregulated
C5_03550W_A	14.4527	14.7451	Not different
C3_01720C_A	14.2983	14.3123	Not different
CR_05380C_A	14.2773	13.0395	Downregulated
C5_03350W_A	14.2406	15.3535	Upregulated
C2_10860C_A	14.3257	13.7194	Not different
C5_04560C_A	14.1195	13.8243	Not different
C6_03960W_A	14.3137	13.1415	Downregulated
C2_02370C_A	14.2625	14.0262	Not different
C2_05180W_A	14.2508	8.78329	Downregulated
C6_04130C_A	14.519	11.3777	Downregulated
C1_06550W_A	14.2596	12.851	Downregulated
C1_02790W_A	14.2492	14.6406	Not different
C3_02780W_A	14.2323	14.9919	Not different
C2_01110C_A	14.2221	13.3737	Not different
CR_00580W_A	14.1874	14.2853	Not different
C5_00390C_A	14.2121	13.8697	Not different
C1_08430W_A	14.1698	12.4231	Downregulated
C1_13300C_A	14.2482	13.8662	Not different
C5_04270C_A	14.2858	14.5717	Not different
C6_02260C_A	14.1579	14.0221	Not different
CR_07010W_A	14.2974	14.1498	Not different
C1_07890C_A	14.2092	14.3154	Not different
CR_09790W_A	14.2091	14.2715	Not different
C2_03470C_A	14.1477	14.0468	Not different
C3_00240C_A	14.2417	13.9753	Not different
C4_00020W_A	14.2186	13.2305	Not different
CR_02920C_A	14.2346	7.97031	Downregulated
C4_00890W_A	14.2154	14.1973	Not different
C5_02170C_A	14.2672	15.2232	Not different
C5_05390C_A	14.3072	14.0632	Not different
C1_02810W_A	14.1408	12.1644	Downregulated
C1_11040W_A	14.0661	14.2323	Not different
C7_01970C_A	14.2854	14.3194	Not different
C7_02890C_A	14.2545	13.8205	Not different
CR_10110W_A	14.3304	12.0022	Downregulated
C1_00110W_A	14.3016	14.0564	Not different
C1_03520W_A	14.0802	13.8276	Not different
C1_04830W_A	14.1564	13.6845	Not different
C3_01550C_A	14.2451	14.2177	Not different
C4_01690C_A	14.0184	12.1548	Downregulated
C2_03280W_A	14.2499	13.5117	Not different
C6_03340C_A	14.1107	12.2748	Downregulated
C6_02730W_A	14.149	13.2175	Not different
C7_00520W_A	14.1338	13.8462	Not different
C3_05710W_A	14.2046	13.1512	Downregulated
C3_07810C_A	14.1378	13.8892	Not different
C5_03140C_A	14.224	13.9492	Not different
C7_03360W_A	14.2909	12.4082	Downregulated
C1_13420C_A	14.0833	13.6615	Not different
CR_08890C_A	14.1232	9.06712	Downregulated
C1_01060W_A	14.0798	13.5172	Not different
C1_05940W_A	14.0697	14.1511	Not different
C2_01590W_A	14.0443	13.9063	Not different
C1_02710W_A	14.0738	14.3343	Not different
CR_09670C_A	14.0613	12.8044	Downregulated
C1_01690C_A	14.0658	14.1934	Not different
CR_04380C_A	14.0345	13.7985	Not different
CR_00320C_A	14.0604	13.8712	Not different
C3_07280C_A	14.1119	13.4553	Not different
C7_01810W_A	14.0953	13.7175	Not different
CR_03770C_A	13.9203	14.1534	Not different
C2_08860W_A	13.9918	12.3986	Downregulated
C2_10670W_A	14.1245	13.4147	Not different
CR_06080W_A	14.0376	13.4733	Not different
C5_05490C_A	14.1653	15.05	Not different
C3_01610W_A	13.9957	14.8857	Not different
C2_07630C_A	13.9503	9.09809	Downregulated
C4_05610C_A	14.1751	12.4879	Downregulated
CR_04000W_A	14.0391	13.5742	Not different
C1_02330C_A	13.8298	14.2509	Not different
C1_02590C_A	14.0354	13.0646	Not different
C1_12030W_A	13.9807	14.5027	Not different
C1_10400C_A	14.0634	12.7645	Downregulated
CR_08120C_A	14.1544	13.6169	Not different
C4_06870W_A	14.0083	13.476	Not different
CR_08950W_A	13.9783	13.2516	Not different
C2_02340C_A	14.0809	13.6257	Not different
C2_05660W_A	14.0862	12.1485	Downregulated
C4_04800W_A	14.1039	13.2564	Not different
C3_04910C_A	14.1091	14.9389	Not different
C4_06030W_A	13.915	13.3953	Not different
C6_03370W_A	14.0502	14.6197	Not different
C2_03960W_A	13.8672	13.9894	Not different
C2_05500W_A	13.983	14.4203	Not different
C1_03130C_A	14.0243	13.111	Not different
CR_00350W_A	14.0565	12.8491	Downregulated
C2_03060W_A	13.9995	13.5171	Not different
C6_01650C_A	13.784	12.2709	Downregulated
C3_00290W_A	14.0332	14.0057	Not different
C4_02870C_A	14.0259	14.461	Not different
C1_11850W_A	13.9096	13.0306	Not different
C4_05100C_A	14.0935	13.2423	Not different
C1_05540C_A	13.8886	12.1011	Downregulated
C1_03100W_A	14.0539	13.0564	Not different
C1_01590C_A	14.0547	13.909	Not different
C1_07230W_A	13.8728	12.3393	Downregulated
C1_01930W_A	13.9852	10.3354	Downregulated
C1_13830C_A	13.9584	13.8666	Not different
C7_02780W_A	14.0311	13.4484	Not different
C2_09640W_A	13.9423	13.5669	Not different
C2_07310W_A	14.0192	14.0347	Not different
C3_02320W_A	14.003	14.4691	Not different
C4_01020C_A	13.8681	13.2831	Not different
C2_09950W_A	13.9152	13.4169	Not different
C3_00260C_A	13.946	13.5717	Not different
C5_03240W_A	13.8375	13.4174	Not different
C1_08950W_A	13.8556	12.1691	Downregulated
C1_08180C_A	13.9894	12.6363	Downregulated
C7_03810W_A	13.835	13.1732	Not different
C2_05720C_A	13.9295	13.4543	Not different
CR_02130W_A	13.8218	11.2371	Downregulated
C2_07290W_A	13.8282	13.4078	Not different
C7_01850C_A	13.8895	12.8903	Not different
C4_00590C_A	13.9868	13.4868	Not different
C1_10680C_A	14.058	12.9548	Downregulated
C2_02410W_A	13.8318	11.614	Downregulated
C6_00910C_A	13.9088	12.6696	Downregulated
C1_14450C_A	14.0759	13.3226	Not different
C4_06500W_A	13.859	13.4124	Not different
C2_08870C_A	13.8533	12.7313	Downregulated
C5_00480C_A	13.8634	13.6677	Not different
CR_08770W_A	13.9553	14.5937	Not different
C2_04580W_A	13.7691	13.5076	Not different
C2_07400C_A	13.9724	12.3665	Downregulated
C4_02250C_A	13.8391	13.0043	Not different
C2_07550W_A	13.8713	13.7027	Not different
C1_01140C_A	13.969	13.3299	Not different
C2_00060C_A	13.9638	13.0427	Not different
C5_00200C_A	14.0226	13.9645	Not different
C2_09710C_A	13.8458	12.4915	Downregulated
C4_03180W_A	13.8875	12.7233	Downregulated
CR_01400W_A	13.8845	12.6189	Downregulated
C4_06760W_A	13.8835	13.2633	Not different
C2_05690C_A	13.7313	13.4537	Not different
C2_02970C_A	13.8754	14.787	Not different
C2_05250C_A	13.7872	13.659	Not different
C1_11590W_A	13.9866	13.1212	Not different
C1_10160W_A	13.8361	15.3478	Upregulated
C1_02620C_A	13.802	13.3786	Not different
C6_04250W_A	13.7687	13.6343	Not different
CR_03530W_A	13.8747	14.0118	Not different
C7_04210C_A	13.8505	13.3496	Not different
CR_01310W_A	13.7513	14.0908	Not different
C2_07900W_A	13.8294	14.8959	Upregulated
C1_14460W_A	13.8851	13.1747	Not different
CR_04060C_A	13.7505	11.2008	Downregulated
C5_02270W_A	13.8815	13.7829	Not different
C1_06940C_A	13.9114	10.8461	Downregulated
C6_04040C_A	13.8639	13.489	Not different
C2_02380W_A	13.8452	13.4379	Not different
C2_09940W_A	13.7627	13.6805	Not different
C2_03240C_A	13.9173	13.1368	Not different
C7_00020C_A	13.8112	12.8871	Not different
C1_00930C_A	13.8291	13.4458	Not different
C1_08400C_A	13.935	13.9896	Not different
C1_08030W_A	13.7242	12.8847	Not different
CR_08910C_A	13.7485	13.3251	Not different
C7_02570C_A	13.7286	13.1828	Not different
C4_01060W_A	13.8373	13.528	Not different
C1_14210C_A	13.8466	12.8032	Downregulated
C3_06890W_A	13.8794	14.0139	Not different
C1_03750W_A	13.6629	11.9049	Downregulated
CR_00360C_A	13.7576	13.5897	Not different
C6_02040W_A	13.7563	13.2609	Not different
C1_03940W_A	13.6668	13.7833	Not different
CR_00470W_A	13.6998	13.2384	Not different
C1_08370W_A	13.9015	13.9837	Not different
C5_00650C_A	13.6813	13.682	Not different
C2_01480W_A	13.8556	13.4841	Not different
C1_00610W_A	13.7413	13.0775	Not different
CR_04960C_A	13.6094	12.3835	Downregulated
C2_07210C_A	13.8038	12.5882	Downregulated
C2_03080W_A	13.9055	14.8372	Not different
C1_14060W_A	13.8263	10.9425	Downregulated
C1_10100C_A	13.6484	13.2411	Not different
C2_05920C_A	13.7144	13.443	Not different
C1_07340W_A	13.774	12.9482	Not different
CR_07490C_A	13.7131	10.4227	Downregulated
C6_04650W_A	13.8941	12.3977	Downregulated
CR_00100C_A	13.9517	13.2354	Not different
C1_05630C_A	13.8233	15.1091	Upregulated
C5_05380W_A	13.6879	13.8957	Not different
C6_00370C_A	13.8664	14.8681	Upregulated
C2_10280C_A	13.7135	12.8227	Not different
C4_04050C_A	13.6586	13.5229	Not different
CR_09010C_A	13.6657	12.116	Downregulated
C7_03200C_A	13.6688	12.6586	Downregulated
C2_02830C_A	13.7916	13.2429	Not different
C2_07010W_A	13.7286	13.4924	Not different
C2_00380C_A	13.7617	13.1919	Not different
C1_11220C_A	13.7388	13.9902	Not different
C3_02400C_A	13.5417	14.166	Not different
C1_02760W_A	13.7208	13.153	Not different
C3_06360C_A	13.7053	13.7139	Not different
C5_02110W_A	13.7174	10.5314	Downregulated
C6_03400C_A	13.6307	13.9767	Not different
CR_07830C_A	13.6808	13.1215	Not different
C1_11030W_A	13.7057	13.3739	Not different
C3_01630W_A	13.7546	14.2755	Not different
CR_10670W_A	13.6902	13.5453	Not different
C6_03940C_A	13.7231	13.4516	Not different
C7_01450C_A	13.6726	14.373	Not different
C5_00800C_A	13.7185	13.0675	Not different
C1_08880W_A	13.5289	11.6777	Downregulated
C3_00200C_A	13.7247	12.9309	Not different
C4_06130W_A	13.645	12.9391	Not different
CR_05920C_A	13.692	13.4322	Not different
C4_02980W_A	13.7185	14.0126	Not different
C2_06210C_A	13.6935	13.435	Not different
C2_10350C_A	13.6889	12.2472	Downregulated
C2_08780W_A	13.6879	13.2032	Not different
C2_10050W_A	13.6216	12.7315	Not different
C5_02080C_A	13.6153	9.64636	Downregulated
C6_03410C_A	13.4966	12.8508	Not different
C2_03520C_A	13.8433	12.8064	Downregulated
C1_03450C_A	13.6418	12.3845	Downregulated
C4_02620C_A	13.814	10.8732	Downregulated
C2_02770W_A	13.7447	13.466	Not different
C6_01720C_A	13.8188	13.8735	Not different
C1_07540C_A	13.8181	12.6548	Downregulated
C2_00260C_A	13.6457	11.7158	Downregulated
C2_06190W_A	13.6827	12.8659	Not different
C1_08540C_A	13.6884	13.169	Not different
C1_03500W_A	13.6014	13.3008	Not different
C2_04620W_A	13.6312	13.4357	Not different
C6_04560W_A	13.6824	13.167	Not different
CR_06760C_A	13.7164	13.7655	Not different
C3_06910C_A	13.6627	13.6715	Not different
C2_06940C_A	13.5268	10.6535	Downregulated
CR_04740C_A	13.7426	14.4547	Not different
C1_05960W_A	13.5876	10.8306	Downregulated
C2_01620W_A	13.5738	13.7193	Not different
C4_00420C_A	13.7591	12.8819	Not different
C4_04770C_A	13.6155	12.5151	Downregulated
C5_00270W_A	13.6614	14.0327	Not different
C4_03360C_A	13.5348	13.5143	Not different
C2_00580C_A	13.6215	12.3941	Downregulated
C3_06850W_A	13.7133	12.8275	Not different
C2_10290W_A	13.7244	12.6848	Downregulated
C1_01870C_A	13.6711	13.7399	Not different
C5_02300C_A	13.5769	13.9926	Not different
C2_07420W_A	13.5668	12.0657	Downregulated
C1_10620W_A	13.6273	14.8582	Upregulated
C6_00130C_A	13.7933	13.5038	Not different
C1_00710C_A	13.5697	13.7455	Not different
C6_01900C_A	13.5825	11.0548	Downregulated
C7_03860W_A	13.5994	11.6769	Downregulated
C3_02170C_A	13.6198	12.9717	Not different
CR_00560W_A	13.6218	11.1573	Downregulated
C5_05200C_A	13.4902	12.0453	Downregulated
C1_02970W_A	13.5669	12.9768	Not different
C7_04260W_A	13.7057	12.9938	Not different
C1_03210C_A	13.5712	13.2611	Not different
C2_07320W_A	13.6175	12.7436	Not different
C6_00300C_A	13.6979	12.6253	Downregulated
C1_11540C_A	13.8138	12.8466	Not different
C2_06420C_A	13.6511	13.0608	Not different
C1_05660C_A	13.6283	13.5712	Not different
C6_04100W_A	13.6348	13.1576	Not different
C7_04240C_A	13.6521	12.3348	Downregulated
C1_00420W_A	13.5056	11.9233	Downregulated
C1_06850W_A	13.6222	12.7539	Not different
CR_03610C_A	13.602	14.0266	Not different
CR_09120C_A	13.6414	13.4834	Not different
CR_10490W_A	13.5313	13.5128	Not different
C7_00860W_A	13.6382	12.9547	Not different
C1_08550C_A	13.4753	12.9798	Not different
C2_03760C_A	13.5756	12.5459	Downregulated
C3_07490W_A	13.5725	12.6171	Not different
C2_06390C_A	13.661	14.579	Not different
C1_06780W_A	13.6347	12.46	Downregulated
C6_01110W_A	13.5267	12.2638	Downregulated
CR_09530C_A	13.6789	11.8663	Downregulated
C5_04700C_A	13.5116	14.3141	Not different
C3_05310W_A	13.5559	13.2459	Not different
C1_11270W_A	13.5857	11.089	Downregulated
C4_00200C_A	13.659	13.2575	Not different
C4_01490W_A	13.4878	14.3399	Not different
C1_03490W_A	13.489	11.2557	Downregulated
C6_04270W_A	13.5802	13.6365	Not different
C2_07130C_A	13.6853	12.6416	Downregulated
C1_09660W_A	13.5583	12.6747	Not different
CR_07650W_A	13.6569	13.6071	Not different
CR_01110W_A	13.557	13.4919	Not different
C2_01410C_A	13.6619	13.3116	Not different
C2_04140W_A	13.5956	13.1245	Not different
C4_04780W_A	13.6298	13.2128	Not different
C7_03330C_A	13.5904	13.6732	Not different
C4_00040W_A	13.7019	12.58	Downregulated
C1_12620W_A	13.586	13.6515	Not different
C1_09850C_A	13.4871	12.6812	Not different
CR_08570W_A	13.6233	12.955	Not different
C5_02890W_A	13.4855	15.4419	Upregulated
C3_02280C_A	13.5162	15.0175	Upregulated
CR_09950C_A	13.5245	14.8272	Upregulated
C7_04020C_A	13.5722	13.0112	Not different
C5_01870W_A	13.5477	14.01	Not different
C5_01960C_A	13.5887	13.8712	Not different
CR_05180C_A	13.4757	13.7914	Not different
C2_00340C_A	13.5746	13.5277	Not different
C5_01770C_A	13.537	12.6636	Not different
C5_04730C_A	13.645	13.8153	Not different
C2_08240W_A	13.509	12.3366	Downregulated
C1_11080W_A	13.3748	13.2866	Not different
C1_00500C_A	13.4521	12.2893	Downregulated
C1_05000W_A	13.4378	12.4264	Downregulated
C5_02930C_A	13.387	11.7537	Downregulated
C7_02100W_A	13.5057	13.5037	Not different
C5_01540W_A	13.44	14.0143	Not different
C6_03720W_A	13.5251	14.1901	Not different
C5_01820W_A	13.5204	14.6284	Upregulated
C1_14240W_A	13.457	13.3152	Not different
C1_01530C_A	13.4941	13.9348	Not different
C1_10490W_A	13.5032	13.0182	Not different
C3_04970C_A	13.4192	12.99	Not different
C3_01860C_A	13.4542	14.1353	Not different
C2_00360C_A	13.5196	13.4153	Not different
C5_02230W_A	13.4378	13.4358	Not different
C1_12410C_A	13.4392	12.244	Downregulated
C1_00140W_A	13.6343	13.1846	Not different
C1_00740C_A	13.4244	13.6436	Not different
C2_00100C_A	13.4749	11.6361	Downregulated
C4_01760W_A	13.3359	12.1703	Downregulated
C5_01690C_A	13.3647	14.3526	Not different
C1_08610C_A	13.4554	14.5388	Upregulated
C3_04470W_A	13.5252	13.8416	Not different
C6_01320W_A	13.3428	13.5791	Not different
C1_05670W_A	13.4079	11.7623	Downregulated
CR_03520C_A	13.5049	12.8168	Not different
C4_03940C_A	13.3965	14.4905	Upregulated
C3_03870C_A	13.5175	12.733	Not different
C6_00280W_A	13.5406	13.9465	Not different
C4_05590W_A	13.3216	11.783	Downregulated
C1_04590W_A	13.2632	12.7533	Not different
C1_03360W_A	13.495	13.5288	Not different
C1_14260C_A	13.4349	13.591	Not different
C2_03360W_A	13.5044	12.9699	Not different
C1_08410C_A	13.3945	13.4522	Not different
CR_10370W_A	13.4103	13.644	Not different
C1_01650W_A	13.3399	12.1414	Downregulated
C2_04850C_A	13.4837	13.0364	Not different
C2_10710W_A	13.4069	13.6764	Not different
C5_01210W_A	13.4714	13.9206	Not different
C5_01320W_A	13.5069	13.7882	Not different
C2_07100W_A	13.3703	12.8376	Not different
CR_08030C_A	13.472	12.5146	Not different
C6_01630W_A	13.4893	13.8236	Not different
C4_01720C_A	13.6653	13.4428	Not different
C1_14520W_A	13.541	12.9191	Not different
C6_02340W_A	13.5029	13.1831	Not different
C3_05590C_A	13.3308	13.9144	Not different
CR_01290C_A	13.4751	12.7983	Not different
C2_01850W_A	13.4027	13.3672	Not different
C6_04280W_A	13.2954	12.1108	Downregulated
CR_00260W_A	13.6505	12.6938	Not different
C2_07740W_A	13.5722	13.1451	Not different
C4_01980C_A	13.3559	12.6452	Not different
C5_04600C_A	13.425	13.1462	Not different
C5_01080C_A	13.481	12.2349	Downregulated
C5_00080C_A	13.398	13.3173	Not different
C4_06830C_A	13.4289	13.6773	Not different
C2_08610W_A	13.3205	12.9814	Not different
C1_03680W_A	13.4747	12.7673	Not different
C1_01490W_A	13.4044	11.9832	Downregulated
C3_04080W_A	13.3265	14.235	Not different
C6_04570W_A	13.5111	12.5051	Downregulated
C4_00150C_A	13.4373	12.6566	Not different
C5_02840C_A	13.4019	13.8628	Not different
C2_07330W_A	13.3987	13.0369	Not different
C4_06120W_A	13.3796	13.059	Not different
C4_02780W_A	13.3728	13.7724	Not different
C2_09230C_A	13.4381	13.0595	Not different
C4_05390W_A	13.2921	12.1428	Downregulated
CR_06490C_A	13.5053	14.2041	Not different
C1_08060W_A	13.3168	11.5543	Downregulated
C2_10210C_A	13.3915	13.5212	Not different
C2_01010W_A	13.4389	12.1539	Downregulated
C1_10280C_A	13.3537	11.4042	Downregulated
C1_11330C_A	13.2915	12.4254	Not different
CR_09340W_A	13.3331	12.3752	Not different
C1_08700W_A	13.3977	12.6045	Not different
C2_05640W_A	13.4674	12.3591	Downregulated
CR_01590C_A	13.296	13.5052	Not different
C1_10660W_A	13.2784	12.9311	Not different
C4_00140C_A	13.4695	13.7101	Not different
C2_06020W_A	13.289	13.0971	Not different
C6_02060W_A	13.3044	13.1364	Not different
C5_02030W_A	13.316	13.5653	Not different
C2_05790C_A	13.3699	12.9327	Not different
CR_08480C_A	13.204	13.4517	Not different
C1_02480W_A	13.1647	12.873	Not different
C2_04500W_A	13.2782	13.1522	Not different
CR_00980C_A	13.448	12.7002	Not different
C3_03170W_A	13.3308	13.3419	Not different
C4_06060W_A	13.3663	11.8309	Downregulated
C2_07590W_A	13.2494	12.6222	Not different
C4_01840C_A	13.2502	12.8226	Not different
CR_10340W_A	13.4737	13.2074	Not different
C4_06810C_A	13.2789	12.7704	Not different
C2_10660W_A	13.4449	12.3081	Downregulated
C7_00830C_A	13.6223	12.9069	Not different
C3_04110C_A	13.2986	12.8005	Not different
C7_00070C_A	13.3378	12.8737	Not different
C4_05240C_A	13.3174	13.2671	Not different
CR_08340W_A	13.4092	13.9667	Not different
C6_01420C_A	13.2514	11.15	Downregulated
C5_04110W_A	13.4818	12.9688	Not different
C4_05450C_A	13.2464	13.0409	Not different
C1_03550C_A	13.3593	12.1873	Downregulated
C3_06280W_A	13.3136	12.5556	Not different
C4_00170W_A	13.2447	12.0493	Downregulated
C1_11350C_A	13.2057	13.2369	Not different
C6_04080W_A	13.2445	13.0949	Not different
C6_02560W_A	13.2697	10.7315	Downregulated
C2_09040W_A	13.1924	11.9978	Downregulated
C6_02930W_A	13.2551	12.5718	Not different
C3_04880W_A	13.3329	13.4575	Not different
CR_05300C_A	13.222	12.195	Downregulated
C2_02590W_A	13.271	13.5651	Not different
C7_01900W_A	13.3706	13.8819	Not different
C3_04820C_A	13.2747	13.737	Not different
C6_02500C_A	13.1385	12.663	Not different
C2_08120W_A	13.3018	12.6598	Not different
C3_02150C_A	13.1764	14.1576	Not different
C1_08420W_A	13.2813	13.1697	Not different
C1_08560W_A	13.2714	13.5449	Not different
C1_07690C_A	13.1922	12.7035	Not different
C4_01370W_A	13.2784	12.508	Not different
C3_07780C_A	13.4122	13.6525	Not different
C1_11870W_A	13.2359	11.6198	Downregulated
C5_00790C_A	13.3939	13.5134	Not different
C1_05530C_A	13.2434	13.0115	Not different
C2_07060W_A	13.1978	10.8931	Downregulated
C3_02680C_A	13.1575	11.6531	Downregulated
C2_03220C_A	13.3427	12.7263	Not different
C2_10240W_A	13.1479	12.078	Downregulated
C2_09520C_A	13.2557	13.512	Not different
C1_02750C_A	13.3083	13.0432	Not different
C2_03900C_A	13.2924	12.8048	Not different
C2_09650W_A	13.3	12.4714	Not different
C3_07260C_A	13.2841	13.6063	Not different
CR_10580W_A	13.2245	12.1789	Downregulated
C4_02060C_A	13.2775	13.2539	Not different
C2_02720W_A	13.2942	13.5988	Not different
C7_03180C_A	13.1932	12.8082	Not different
C1_09650W_A	13.1935	11.5296	Downregulated
C1_03390W_A	13.2334	12.3353	Not different
C5_02710W_A	13.2601	13.2892	Not different
C1_09030C_A	13.1848	13.1444	Not different
CR_07480W_A	13.2532	11.3127	Downregulated
C1_05560W_A	13.1994	11.8408	Downregulated
C4_02970C_A	13.247	13.1009	Not different
C1_08110W_A	13.3716	13.6971	Not different
C1_08780W_A	13.1823	11.7885	Downregulated
C1_00440W_A	13.1934	13.2164	Not different
C3_05650W_A	13.2417	13.6153	Not different
C1_07410C_A	13.0937	12.5745	Not different
C6_02330W_A	13.2434	14.032	Not different
C4_04390W_A	13.1792	13.0163	Not different
C2_01550W_A	13.2963	11.9845	Downregulated
C4_06720W_A	13.3273	14.8074	Upregulated
C2_09270C_A	13.1642	13.1193	Not different
C1_01700W_A	13.1813	12.6318	Not different
C3_00770C_A	13.0542	13.5092	Not different
CR_05980W_A	13.1647	12.6626	Not different
C1_11730W_A	13.3065	12.8003	Not different
C2_04050C_A	13.2122	12.7372	Not different
C1_12380C_A	13.1848	13.9074	Not different
C1_03120W_A	13.1272	12.2339	Not different
C2_08500W_A	13.2192	12.8973	Not different
C3_01890C_A	13.2568	13.5383	Not different
C3_03910W_A	13.1456	13.2175	Not different
C2_01530C_A	13.2521	12.4877	Not different
C5_05500C_A	13.2299	13.1331	Not different
C2_02100W_A	13.2015	12.8243	Not different
CR_02870W_A	13.1532	12.9349	Not different
C6_01760W_A	13.2359	12.812	Not different
CR_10300W_A	13.2051	12.8281	Not different
CR_08710W_A	13.2795	13.0569	Not different
C3_03040W_A	13.2799	14.3908	Upregulated
CR_07090W_A	13.1607	12.6735	Not different
C7_03070C_A	13.1757	12.8037	Not different
CR_05440W_A	13.1817	11.5116	Downregulated
C2_09020W_A	13.2478	13	Not different
CR_02090C_A	13.2201	13.0227	Not different
C2_08000C_A	13.2513	14.6975	Upregulated
CR_04570C_A	13.1163	12.8807	Not different
C7_04130C_A	13.1527	13.6362	Not different
C7_00750W_A	13.0346	11.9797	Downregulated
C1_13350W_A	13.2187	12.7986	Not different
C3_00250C_A	13.3181	13.9686	Not different
C7_00190W_A	13.2174	12.5562	Not different
CR_06180W_A	13.1186	12.4027	Not different
C6_00170C_A	13.3337	12.9814	Not different
C4_05810W_A	13.2001	12.0952	Downregulated
C7_00390W_A	13.195	13.1889	Not different
CR_01610C_A	13.1059	12.4466	Not different
CR_00520C_A	13.1914	13.5221	Not different
C1_10940C_A	13.1072	12.6664	Not different
C7_02640W_A	13.2551	13.4564	Not different
C4_01770W_A	13.0714	12.4868	Not different
C5_02790C_A	13.0955	12.4614	Not different
C4_04330C_A	13.1724	12.8186	Not different
C7_02910W_A	13.2371	14.8665	Upregulated
C2_05890C_A	13.1888	12.4593	Not different
C5_04800W_A	13.0965	11.75	Downregulated
C1_06810W_A	13.3247	11.3636	Downregulated
C1_02050C_A	13.1881	12.229	Not different
C1_03780C_A	13.1701	13.1688	Not different
C6_00100C_A	13.0791	12.4322	Not different
CR_07710W_A	13.121	13.1435	Not different
C5_00040C_A	13.1794	13.5659	Not different
C1_01320W_A	13.1712	13.3642	Not different
CR_06750C_A	13.0501	12.6411	Not different
C5_01090C_A	13.0997	12.8399	Not different
CR_09140C_A	13.1754	8.72343	Downregulated
C1_01790W_A	13.1491	12.773	Not different
C1_06660W_A	13.1434	11.3498	Downregulated
C1_12970C_A	13.0321	11.4942	Downregulated
C1_04210C_A	13.0997	12.7212	Not different
C1_00950C_A	13.1952	12.9038	Not different
C2_03330C_A	13.1193	12.7025	Not different
C3_01990W_A	13.1042	13.4067	Not different
CR_07450C_A	13.2326	12.2909	Not different
C3_00800W_A	13.2734	12.2443	Downregulated
CR_08560C_A	13.0457	12.8415	Not different
C4_00260W_A	13.1518	12.1697	Not different
C2_08010W_A	13.0785	13.2732	Not different
C2_05930W_A	12.9976	12.7628	Not different
C5_00180W_A	13.2957	14.1011	Not different
C2_09750W_A	13.1298	11.8859	Downregulated
C1_12490W_A	13.1011	12.8574	Not different
C1_12960C_A	13.0955	12.6086	Not different
C4_06580W_A	12.9948	13.5297	Not different
C5_05450C_A	13.0879	11.4084	Downregulated
C4_00400W_A	13.2098	11.8163	Downregulated
C4_00570C_A	13.0149	12.0287	Not different
C5_04640C_A	13.0821	13.2808	Not different
C7_00730W_A	13.0634	12.8701	Not different
C1_00160C_A	13.1535	14.5468	Upregulated
C2_01690W_A	13.0166	13.6567	Not different
CR_09380W_A	13.0488	12.9126	Not different
CR_02610C_A	13.0869	12.9794	Not different
C5_00150C_A	13.277	13.9404	Not different
CR_03990C_A	13.0965	13.0811	Not different
C1_11480W_A	13.0705	14.0224	Not different
C7_00150W_A	13.0739	12.4687	Not different
C1_10090C_A	13.1599	11.7855	Downregulated
C3_04860W_A	13.3249	13.2065	Not different
C1_11990W_A	13.0672	11.7078	Downregulated
C5_04920C_A	13.0103	13.128	Not different
C1_13580W_A	13.0582	12.6751	Not different
C2_00140W_A	13.3618	12.5188	Not different
C2_08390W_A	12.9682	10.7579	Downregulated
CR_04340W_A	13.1914	13.2106	Not different
CR_10140W_A	13.0374	14.1657	Upregulated
C1_14340C_A	13.3804	13.3519	Not different
C6_00440C_A	13.2928	12.9956	Not different
C6_04480C_A	13.0069	11.4137	Downregulated
C3_04590W_A	12.9791	13.2538	Not different
C3_05880C_A	13.1179	13.3903	Not different
C1_00750C_A	13.1547	12.285	Not different
C7_03010W_A	13.06	13.1121	Not different
C3_02610C_A	13.0666	11.0926	Downregulated
C1_00040W_A	12.8589	12.7356	Not different
C1_04420C_A	12.9652	12.852	Not different
C1_09490C_A	13.182	14.7028	Upregulated
C2_00830C_A	13.1108	12.9911	Not different
C1_04450C_A	12.9575	12.8204	Not different
C7_00030W_A	13.1313	12.2285	Not different
C3_00110C_A	13.1565	12.9678	Not different
CR_04300W_A	13.0672	13.811	Not different
CR_07420W_A	13.1294	14.1139	Not different
C2_01270W_A	12.9989	12.4188	Not different
C1_04480C_A	13.0652	12.4415	Not different
C1_03560C_A	13.0629	12.6267	Not different
CR_03810W_A	13.151	11.9266	Downregulated
C2_06150C_A	13.0127	12.7793	Not different
C1_07710C_A	13.006	14.0841	Upregulated
CR_04080C_A	13.0979	13.1083	Not different
C2_08930W_A	12.8871	12.6536	Not different
C5_02470W_A	13.0221	13.6526	Not different
C1_04970W_A	13.0907	13.6627	Not different
CR_07230W_A	13.0247	12.0085	Downregulated
CR_07440W_A	13.22	12.5387	Not different
C3_07560W_A	13.4127	12.4859	Not different
C3_02180C_A	12.9194	13.9236	Upregulated
CR_04140W_A	13.0344	13.8105	Not different
C5_02000C_A	13.0965	14.5618	Upregulated
CR_08430W_A	13.0812	12.5245	Not different
C2_00760C_A	12.9696	11.3557	Downregulated
CR_03280W_A	12.9753	11.544	Downregulated
C1_11170W_A	12.9665	12.5694	Not different
C2_00400C_A	12.9096	13.8362	Not different
C3_05930W_A	12.9577	13.1627	Not different
C3_02490C_A	12.9743	13.6977	Not different
C7_01780W_A	13.0445	12.3606	Not different
C2_00120C_A	13.0639	12.142	Not different
CR_04720C_A	12.9102	12.1798	Not different
C1_13810W_A	13.0621	12.5972	Not different
C2_08130W_A	12.9412	10.2647	Downregulated
C7_00740W_A	13.0099	12.182	Not different
C2_05100C_A	12.968	13.9629	Not different
C3_05970C_A	13.1782	12.7961	Not different
C3_04390W_A	12.8804	13.4152	Not different
CR_02170W_A	13.0512	12.8367	Not different
C1_04520C_A	12.9825	12.215	Not different
C2_09460C_A	13.0521	11.9166	Downregulated
C1_12320C_A	12.8747	13.6096	Not different
C4_02890C_A	12.9312	12.8174	Not different
C1_05170C_A	13.0212	11.8306	Downregulated
C5_05120W_A	13.0423	13.8434	Not different
C1_00480C_A	13.1263	13.1189	Not different
C4_03110W_A	12.9217	12.4922	Not different
C3_05450C_A	12.9154	11.5085	Downregulated
C4_06270C_A	12.8479	12.1644	Not different
C2_10590W_A	13.0826	13.5776	Not different
C2_08160C_A	12.9066	12.5038	Not different
C1_06960W_A	12.9347	13.4446	Not different
C2_07730W_A	13.0993	12.1322	Not different
C3_03280C_A	12.9078	12.9478	Not different
C7_03890C_A	13.0275	12.8588	Not different
CR_09980W_A	12.9772	12.7584	Not different
C1_02980W_A	12.964	9.92539	Downregulated
C1_10890C_A	12.893	12.1759	Not different
C2_07600C_A	13.0386	12.1675	Not different
C4_05150W_A	12.8879	12.7776	Not different
C1_08600C_A	13.0304	13.1885	Not different
C6_02470W_A	12.7948	13.0005	Not different
C1_03310W_A	12.9339	12.8281	Not different
CR_09690C_A	13.0026	12.407	Not different
C7_01940C_A	13.016	11.3096	Downregulated
C1_01560W_A	13.2018	12.4261	Not different
C6_03130W_A	12.9233	13.2007	Not different
C7_01550W_A	12.9016	13.039	Not different
C6_03160C_A	12.9318	12.0166	Not different
C2_03140C_A	12.8877	11.8832	Downregulated
C2_02460W_A	12.9929	12.0469	Not different
C1_07180W_A	12.9453	12.1359	Not different
C4_03600C_A	12.8335	11.4726	Downregulated
C2_07390C_A	13.0392	12.4836	Not different
CR_02040W_A	12.9816	12.2152	Not different
C2_01600C_A	12.9148	12.8204	Not different
C7_03720C_A	12.9284	13.5867	Not different
CR_00490W_A	12.9455	12.9779	Not different
C3_07420W_A	12.9148	13.9776	Upregulated
C3_02160C_A	13.1677	13.4253	Not different
C3_07730W_A	13.0173	11.9915	Downregulated
CR_04180C_A	13.0056	12.5326	Not different
C1_11770C_A	13.1442	12.3782	Not different
CR_08000C_A	13.0621	12.8174	Not different
C2_04220C_A	12.8792	12.483	Not different
CR_04550W_A	12.8857	12.5394	Not different
C2_02030W_A	12.8776	13.8877	Upregulated
C4_00070C_A	13.0484	12.1451	Not different
CR_00060C_A	13.0612	12.4575	Not different
C4_06340W_A	12.7759	11.7474	Downregulated
C2_01990C_A	12.7391	12.1215	Not different
C2_01430W_A	12.8637	12.968	Not different
C3_05520C_A	12.9711	13.3458	Not different
C3_00450C_A	12.9921	13.847	Not different
C3_00710W_A	12.9652	13.4401	Not different
CR_01240C_A	13.0664	12.4345	Not different
C4_00280W_A	12.911	12.587	Not different
C6_02600W_A	13.004	12.5703	Not different
C2_06170C_A	13.0605	13.6537	Not different
CR_01820W_A	12.8794	12.155	Not different
C1_13190W_A	12.7969	11.6722	Downregulated
C3_06860C_A	12.7598	12.4789	Not different
C1_08270C_A	13.0759	12.4343	Not different
C2_06290C_A	12.8027	13.2826	Not different
C4_02320C_A	12.8438	12.0309	Not different
C5_04050W_A	12.8879	11.492	Downregulated
C1_09610W_A	12.7854	11.5116	Downregulated
C2_02760W_A	12.9281	12.6706	Not different
C2_07140W_A	12.6977	11.3363	Downregulated
C1_12230W_A	12.9398	12.279	Not different
C1_11550W_A	12.8976	13.4419	Not different
C4_06680C_A	13.072	13.0864	Not different
C4_01250W_A	12.7913	10.067	Downregulated
C2_07610C_A	12.877	12.5491	Not different
C6_03460W_A	13.0648	12.3825	Not different
C1_11450C_A	12.9563	13.161	Not different
CR_02510W_A	12.958	12.6347	Not different
C2_06820C_A	12.8643	12.743	Not different
C3_03260W_A	12.9208	13.3758	Not different
CR_00250W_A	12.8471	12.7336	Not different
C1_13920W_A	12.7978	11.3423	Downregulated
C2_00740C_A	12.8606	12.1834	Not different
CR_04200W_A	12.9386	14.0264	Upregulated
C5_00750C_A	12.8898	12.0238	Not different
C1_11120C_A	12.8085	12.4744	Not different
C4_07190W_A	12.9279	12.5682	Not different
C2_07220W_A	12.8102	12.0584	Not different
C1_08010W_A	12.8164	12.3608	Not different
C2_06540C_A	12.9507	12.8727	Not different
CR_07050C_A	13.1051	14.2517	Upregulated
C4_00450C_A	12.8049	8.50618	Downregulated
CR_02000C_A	12.9425	12.4394	Not different
C4_04530C_A	13.0304	12.2155	Not different
C1_02920W_A	12.8341	12.4632	Not different
C2_09980W_A	12.8306	11.487	Downregulated
CR_07890W_A	13.0634	12.7963	Not different
C2_07640W_A	12.824	12.2793	Not different
C3_05150W_A	12.9715	12.9621	Not different
C2_07650C_A	12.7671	12.1259	Not different
C2_01220W_A	12.7809	12.8532	Not different
C5_02660C_A	12.8217	14.3387	Upregulated
C7_00550C_A	12.8922	13.4205	Not different
C1_14190C_A	12.7932	10.6252	Downregulated
C2_00570W_A	12.9472	12.7334	Not different
C3_04300C_A	12.8964	13.4314	Not different
C1_02780W_A	12.8034	11.2536	Downregulated
C2_05650W_A	12.8651	12.222	Not different
C2_01390W_A	12.9288	12.5206	Not different
C4_05540W_A	12.8192	12.4282	Not different
C5_02210W_A	12.7605	13.2501	Not different
CR_08020C_A	12.8132	13.0581	Not different
C7_02860C_A	12.892	12.6582	Not different
C5_03500W_A	12.8523	12.2738	Not different
C5_01520C_A	12.817	13.0529	Not different
CR_00230W_A	12.8678	13.0456	Not different
C6_00350W_A	13.0171	12.0946	Not different
C1_03860C_A	12.8639	12.724	Not different
CR_06810W_A	12.726	12.8124	Not different
C7_01230C_A	12.7362	11.7954	Not different
CR_01970C_A	12.7713	12.2209	Not different
C2_04030C_A	12.8291	13.1754	Not different
C1_09830W_A	12.8102	12.665	Not different
CR_05080W_A	12.7902	12.7872	Not different
C3_03360W_A	12.793	12.2274	Not different
C4_03290W_A	12.7664	13.0412	Not different
C4_04580W_A	12.9991	12.4148	Not different
C3_05210C_A	12.7943	13.371	Not different
C2_08800C_A	12.8488	12.0047	Not different
CR_08650C_A	12.8837	11.5023	Downregulated
C1_03620C_A	12.6624	12.5104	Not different
C1_02420C_A	12.9665	12.8886	Not different
C3_01910C_A	12.8213	13.2963	Not different
C1_07840W_A	12.6928	11.6514	Downregulated
C2_10750C_A	12.8896	12.6097	Not different
C4_01710C_A	13.0585	12.5261	Not different
C7_04280C_A	12.8168	10.8746	Downregulated
C5_00070W_A	12.7986	13.0583	Not different
C1_12450C_A	12.7344	12.6177	Not different
C3_06070C_A	12.7991	13.205	Not different
C2_04550C_A	12.8209	14.1792	Upregulated
C3_01530C_A	12.6602	12.6263	Not different
C1_06590C_A	12.7876	12.6312	Not different
C2_03410W_A	12.8187	12.3962	Not different
CR_01500W_A	12.988	12.4195	Not different
CR_08290W_A	12.845	11.9256	Not different
CR_04050C_A	12.8316	13.1642	Not different
C2_10010C_A	12.6914	12.1434	Not different
C4_02470C_A	12.6507	12.6399	Not different
C4_05430C_A	12.748	11.8267	Not different
C1_04230W_A	12.6882	12.267	Not different
CR_01170W_A	12.6816	12.9181	Not different
C5_00030W_A	12.9459	13.615	Not different
C2_05530C_A	12.7995	12.4942	Not different
C2_07560W_A	12.8665	12.5611	Not different
C1_03480C_A	12.6624	11.9578	Not different
CR_05240C_A	12.7571	12.4554	Not different
C4_03390W_A	12.7002	12.4029	Not different
C5_00210C_A	12.8628	13.3986	Not different
CR_04530W_A	12.7278	12.0291	Not different
C2_07930C_A	13.0278	11.8206	Downregulated
C6_02280W_A	12.7669	12.1357	Not different
C1_00080C_A	12.7774	11.5292	Downregulated
C2_01670C_A	12.7489	12.6963	Not different
CR_09650W_A	13.0481	12.0669	Not different
C1_10380C_A	12.8232	13.0497	Not different
C6_03750C_A	12.6923	12.3131	Not different
C5_03960W_A	12.7389	12.4789	Not different
C1_09460W_A	12.7131	13.1102	Not different
C1_08490W_A	12.7348	12.1655	Not different
C1_01520C_A	12.6872	12.3948	Not different
C4_06600W_A	12.6868	12.7219	Not different
C2_01200C_A	12.9363	13.5572	Not different
CR_00510C_A	12.6424	12.3808	Not different
CR_07190W_A	12.7303	11.4037	Downregulated
C1_04960C_A	12.5328	11.6666	Not different
C1_01890C_A	12.7965	11.7841	Downregulated
C5_04290C_A	12.6988	12.8819	Not different
C2_02020W_A	12.7069	12.363	Not different
C4_05030C_A	12.7737	12.3823	Not different
CR_06700C_A	12.6683	11.5103	Downregulated
C1_03730C_A	12.7377	12.0318	Not different
C2_09320C_A	12.8369	14.482	Upregulated
CR_02930W_A	12.6624	11.9369	Not different
CR_04360C_A	12.6912	13.5879	Not different
CR_10800C_A	12.9703	12.2667	Not different
CR_02150W_A	12.7023	12.3195	Not different
C6_00150W_A	12.9443	13.4988	Not different
C1_11310C_A	12.7222	12.8336	Not different
C5_00220W_A	12.7627	12.6179	Not different
C1_10010C_A	12.7613	12.6173	Not different
C6_02980C_A	12.7027	11.962	Not different
C6_03900W_A	12.711	12.2379	Not different
C7_03240W_A	12.6199	12.2344	Not different
C2_02990C_A	12.7554	12.0222	Not different
C1_08940C_A	12.8498	11.4579	Downregulated
C7_03270W_A	13.0073	13.5492	Not different
C3_03520C_A	12.6886	12.9571	Not different
C2_00490W_A	12.7133	12.3076	Not different
CR_02860W_A	12.7078	12.9246	Not different
C2_05470W_A	12.7128	12.166	Not different
C7_02770W_A	12.7285	12.4769	Not different
CR_08060C_A	12.7487	11.7727	Not different
C6_02610C_A	12.5841	12.7248	Not different
C1_08050W_A	12.601	13.1003	Not different
C4_05900C_A	12.8138	11.8704	Not different
C2_10850C_A	12.8121	12.7023	Not different
C2_10460C_A	12.6784	12.664	Not different
C3_04520C_A	12.7791	13.3847	Not different
C4_06400C_A	12.5746	12.2263	Not different
C1_02210W_A	12.7328	12.0575	Not different
C3_02920W_A	12.6179	12.682	Not different
C7_02850W_A	12.6081	12.2122	Not different
C6_00410C_A	12.7471	11.8545	Not different
CR_01520W_A	12.7265	12.2373	Not different
C6_04500C_A	12.7516	12.3495	Not different
C7_03370C_A	12.5663	12.0157	Not different
C1_03350C_A	12.8604	13.6412	Not different
C3_07060W_A	12.6196	14.2284	Upregulated
C3_01670W_A	12.6898	12.4696	Not different
C6_03710W_A	12.7699	10.271	Downregulated
C2_02980C_A	12.7865	11.9464	Not different
CR_05210W_A	12.6407	12.1116	Not different
C1_06520C_A	12.5528	11.1579	Downregulated
C1_01250W_A	12.7359	12.4273	Not different
C3_06820C_A	12.7948	12.8581	Not different
C1_02820W_A	12.7359	12.6532	Not different
C4_01950W_A	12.6052	11.8821	Not different
C6_02220W_A	12.5229	12.19	Not different
C1_04770C_A	12.6655	10.6358	Downregulated
C5_04090C_A	12.6262	13.5219	Not different
CR_01750C_A	12.697	12.3667	Not different
C7_01470C_A	12.552	12.5093	Not different
C3_00670C_A	12.7778	12.726	Not different
C6_03380W_A	12.6984	13.3721	Not different
C4_06650W_A	12.6221	12.2759	Not different
C1_14360C_A	12.8283	10.6186	Downregulated
C1_10360C_A	12.8104	11.6678	Downregulated
C2_08490W_A	12.6407	11.9829	Not different
C6_04290W_A	12.9	12.4703	Not different
CR_02390W_A	12.7011	12.0447	Not different
CR_04450C_A	12.7323	12.2252	Not different
C1_13030C_A	12.6633	13.3387	Not different
CR_08660W_A	12.6907	12.7543	Not different
C3_00820W_A	12.6666	12.3958	Not different
C3_05190C_A	12.6732	12.1573	Not different
C4_03020W_A	12.7228	11.8331	Not different
C1_03690W_A	12.6192	12.0198	Not different
C1_08800W_A	12.5252	11.5379	Not different
C3_03670W_A	12.4684	11.5874	Not different
C5_05400W_A	12.6854	13.3166	Not different
C1_13260W_A	12.5784	11.8016	Not different
C1_14300C_A	12.7769	11.2594	Downregulated
C3_00480C_A	12.5831	10.8199	Downregulated
C5_01290C_A	12.601	12.5935	Not different
C4_02360W_A	12.5069	9.79188	Downregulated
CR_06470W_A	12.6201	11.8281	Not different
C5_01230C_A	12.4859	12.4139	Not different
C4_04830W_A	12.5789	12.1772	Not different
C1_10930C_A	12.5741	11.5085	Downregulated
C1_00730C_A	12.6725	12.512	Not different
C1_02370C_A	12.6079	12.0884	Not different
C3_00760W_A	12.566	11.9382	Not different
C1_04730C_A	12.5203	12.7351	Not different
C1_07110W_A	12.664	11.9428	Not different
C4_04160W_A	12.5268	12.8951	Not different
C7_01710W_A	12.533	12.1584	Not different
C4_06110C_A	12.7043	13.2425	Not different
C3_06590W_A	12.5809	12.783	Not different
C3_07250W_A	12.5508	13.4952	Not different
C3_06920W_A	12.4312	12.2198	Not different
C4_01870C_A	12.5758	12.4357	Not different
C1_14420W_A	12.6965	11.7522	Not different
C1_03400W_A	12.6921	11.8961	Not different
CR_01350C_A	12.5312	12.3696	Not different
C4_05180C_A	12.5916	12.5407	Not different
C1_07880C_A	12.6148	12.1836	Not different
C1_09990W_A	12.499	12.1895	Not different
C3_01950C_A	12.4995	12.4728	Not different
C2_03790C_A	12.6226	9.44798	Downregulated
C1_08220W_A	12.6579	12.3825	Not different
C4_01660W_A	12.5413	12.6808	Not different
C5_02850W_A	12.5622	13.3532	Not different
C5_04670W_A	12.6199	12.8811	Not different
C2_05110W_A	12.5693	11.7671	Not different
C3_07010W_A	12.5814	11.2079	Downregulated
CR_09300C_A	12.6426	12.0216	Not different
C7_00320C_A	12.7242	12.4561	Not different
C1_02650W_A	12.5502	12.8836	Not different
C2_03020C_A	12.7121	11.2509	Downregulated
C3_06300W_A	12.633	13.0869	Not different
C1_14140C_A	12.6354	11.8673	Not different
C4_05960W_A	12.5541	11.9937	Not different
C1_09690W_A	12.6335	9.5428	Downregulated
CR_01740W_A	12.4998	12.8945	Not different
C2_04370W_A	12.5229	13.2561	Not different
C7_03220C_A	12.5683	12.6159	Not different
C4_06800W_A	12.5698	12.6992	Not different
C3_00490W_A	12.6361	12.2824	Not different
CR_05750W_A	12.6233	9.55659	Downregulated
C7_03490W_A	12.5074	11.7983	Not different
C5_04750C_A	12.5769	14.5157	Upregulated
C1_09080C_A	12.7706	12.4684	Not different
C2_10440C_A	12.5711	11.7254	Not different
C4_07060W_A	12.714	13.1359	Not different
C1_14470W_A	12.6428	11.5031	Downregulated
C1_03440C_A	12.5348	12.3757	Not different
C4_03960W_A	12.3159	10.3513	Downregulated
C2_08100W_A	12.5085	11.4008	Downregulated
C5_00300C_A	12.597	12.8962	Not different
CR_07590W_A	12.5203	12.5594	Not different
C4_05970W_A	12.624	11.3975	Downregulated
CR_00540C_A	12.4913	11.9388	Not different
C6_01150W_A	12.6678	12.2469	Not different
C1_00650C_A	12.4527	12.3212	Not different
C3_07680W_A	12.5753	12.8352	Not different
C6_03650C_A	12.5533	12.3316	Not different
CR_00400C_A	12.5597	12.3574	Not different
C4_02120W_A	12.4466	12.1172	Not different
C2_09400C_A	12.5708	11.5318	Downregulated
C6_00560W_A	12.4803	11.9434	Not different
CR_08050C_A	12.5449	11.8045	Not different
CR_03420C_A	12.7242	12.4101	Not different
C7_04040C_A	12.4862	11.9736	Not different
C7_02810W_A	12.6069	12.9717	Not different
C2_01380W_A	12.6671	10.3631	Downregulated
C4_00780C_A	12.5032	12.6934	Not different
C1_06080C_A	12.3621	12.161	Not different
C4_00970C_A	12.7787	13.9486	Upregulated
C7_01840W_A	12.5296	12.6895	Not different
CR_00120C_A	12.5921	12.5781	Not different
CR_06070W_A	12.6445	11.7939	Not different
C1_01050C_A	12.4798	12.2844	Not different
C7_03940C_A	12.5418	12.0663	Not different
C5_04430C_A	12.5276	12.4376	Not different
C1_14120C_A	12.6015	11.1997	Downregulated
C6_03920W_A	12.4295	12.0819	Not different
CR_02770C_A	12.402	11.6642	Not different
C1_07270W_A	12.4579	12.3603	Not different
C7_00250C_A	12.4776	12.2544	Not different
C6_03350C_A	12.48	12.0887	Not different
C4_02860W_A	12.4119	11.3733	Downregulated
C3_07000W_A	12.5124	12.9214	Not different
C4_03590C_A	12.5781	11.9229	Not different
C2_06230W_A	12.5786	12.6626	Not different
C5_00830C_A	12.5216	12.5329	Not different
C3_07610W_A	12.5436	12.6753	Not different
C2_06320W_A	12.6536	11.9575	Not different
C5_00500W_A	12.5599	13.6412	Upregulated
C4_05740C_A	12.4976	12.67	Not different
C1_02260C_A	12.3763	12.4084	Not different
C4_05630W_A	12.4854	12.3373	Not different
C3_06560W_A	12.5589	11.8739	Not different
C6_00190W_A	12.5278	12.086	Not different
C2_02050C_A	12.515	11.8203	Not different
C4_04240C_A	12.7053	12.3938	Not different
C7_00890C_A	12.5061	12.5709	Not different
C1_13930W_A	12.6647	11.3816	Downregulated
C3_01760W_A	12.5908	13.2719	Not different
C4_00770C_A	12.3739	12.4056	Not different
C3_03680W_A	12.5559	12.0863	Not different
C2_04240C_A	12.3932	12.127	Not different
CR_08640C_A	12.5428	13.0207	Not different
C6_01220C_A	12.4603	12.4893	Not different
C4_02290W_A	12.4113	12.2312	Not different
C1_08450C_A	12.525	12.559	Not different
C3_04780C_A	12.4573	12.5562	Not different
C2_04230W_A	12.5114	11.8552	Not different
C1_14250C_A	12.5665	11.649	Not different
C1_11400C_A	12.5402	12.6296	Not different
C2_00710W_A	12.495	12.3905	Not different
CR_03470W_A	12.5273	11.1958	Downregulated
C3_02260C_A	12.4353	12.8131	Not different
C3_07320W_A	12.6455	12.5859	Not different
CR_05950C_A	12.5738	11.7939	Not different
C6_00620W_A	12.4107	11.3547	Downregulated
CR_09550C_A	12.3903	12.4823	Not different
C2_08190W_A	12.4409	12.2986	Not different
C1_04910C_A	12.3711	11.0554	Downregulated
C4_06540W_A	12.4169	11.5845	Not different
C2_02000W_A	12.4453	12.2865	Not different
C3_01700W_A	12.4966	13.0791	Not different
C7_02790C_A	12.5713	12.2098	Not different
C4_01300W_A	12.4806	11.1276	Downregulated
C7_02390W_A	12.3638	11.4329	Not different
C1_13220C_A	12.4784	12.0374	Not different
C4_00300C_A	12.6182	12.3185	Not different
C1_13320C_A	12.5756	12.4008	Not different
C4_04260C_A	12.4897	12.3505	Not different
C4_05320W_A	12.44	12.8227	Not different
C4_07130W_A	12.5561	12.2709	Not different
C2_03800C_A	12.5208	11.7208	Not different
C5_02400W_A	12.4595	12.5882	Not different
C7_00670C_A	12.5064	12.1276	Not different
C3_05700W_A	12.7308	12.7921	Not different
C1_06530C_A	12.4701	12.2772	Not different
CR_07000C_A	12.3156	12.0257	Not different
C1_00530C_A	12.4961	11.579	Not different
C2_00190C_A	12.5177	11.7357	Not different
C5_03390C_A	12.3547	12.7044	Not different
C5_04100W_A	12.4929	12.3941	Not different
C7_04200C_A	12.5116	13.4162	Not different
C2_03540W_A	12.539	11.3753	Downregulated
C4_05280W_A	12.3521	12.2978	Not different
C1_07440W_A	12.491	11.7372	Not different
C1_14040W_A	12.376	11.1969	Downregulated
C2_04760W_A	12.6505	12.2772	Not different
CR_10230W_A	12.4905	11.7342	Not different
C4_06740C_A	12.4164	12.0484	Not different
C1_03760C_A	12.4014	12.2207	Not different
CR_10600C_A	12.5148	12.2686	Not different
C2_09740W_A	12.4239	12.3378	Not different
CR_03500W_A	12.5405	15.1917	Upregulated
C1_00460W_A	12.4931	12.5018	Not different
C4_03200C_A	12.2544	11.4156	Not different
CR_08350W_A	12.4065	12.0429	Not different
C3_05220W_A	12.5087	15.1846	Upregulated
C5_01800C_A	12.4334	11.9259	Not different
C2_07190C_A	12.3629	12.8814	Not different
C2_03300W_A	12.4776	12.1936	Not different
C3_04400C_A	12.4411	13.0534	Not different
C6_03250W_A	12.4014	9.01315	Downregulated
C5_02050W_A	12.514	12.8441	Not different
C2_09970C_A	12.3676	12.6269	Not different
C2_05220C_A	12.4256	12.6316	Not different
C7_00360W_A	12.4414	12.7339	Not different
C3_00880W_A	12.5926	14.1931	Upregulated
C1_03160C_A	12.3877	11.8513	Not different
C2_04170C_A	12.4088	12.551	Not different
C4_04710W_A	12.4301	11.4423	Not different
C6_03290W_A	12.4037	11.445	Not different
C3_01160W_A	12.5607	12.6028	Not different
CR_02140W_A	12.4043	11.8777	Not different
C4_02110W_A	12.3687	10.4293	Downregulated
C1_14430C_A	12.5708	11.619	Not different
C2_01920C_A	12.3699	11.1143	Downregulated
C6_02810C_A	12.4447	11.5765	Not different
CR_06140W_A	12.5743	11.3591	Downregulated
C4_06250C_A	12.4838	12.0116	Not different
C2_01170C_A	12.4857	12.3953	Not different
C2_02490C_A	12.5508	11.1991	Downregulated
C4_04720W_A	12.5252	12.825	Not different
C6_03800C_A	12.3335	11.6235	Not different
C3_07480W_A	12.4068	12.0827	Not different
C1_07780W_A	12.3869	12.2054	Not different
CR_09960C_A	12.52	11.8489	Not different
C6_00250W_A	12.567	10.6374	Downregulated
C3_02370C_A	12.5408	13.7882	Upregulated
C2_05780C_A	12.4819	11.686	Not different
C7_02800W_A	12.5291	12.4404	Not different
CR_08370W_A	12.4725	12.1917	Not different
C4_00340W_A	12.3742	12.1055	Not different
C7_04270C_A	12.3957	11.7097	Not different
C1_08300W_A	12.5226	12.4394	Not different
C2_10480W_A	12.3068	11.2019	Downregulated
C1_03280W_A	12.3527	12.8567	Not different
C1_11930W_A	12.7188	12.2131	Not different
C4_02710C_A	12.3489	12.6986	Not different
CR_01770C_A	12.4806	11.7372	Not different
CR_04240C_A	12.5756	14.2151	Upregulated
C2_01970C_A	12.5766	11.7387	Not different
C5_01760C_A	12.3719	11.7181	Not different
C2_04490W_A	12.3771	11.9266	Not different
C2_07480W_A	12.4657	11.6458	Not different
C1_09450C_A	12.3092	12.4852	Not different
C3_00940W_A	12.4326	12.3984	Not different
C1_00310W_A	12.5093	9.89316	Downregulated
C2_01360C_A	12.4945	12.1853	Not different
C5_03150W_A	12.4819	11.9902	Not different
C3_04410C_A	12.3832	12.7319	Not different
C1_14530W_A	12.3129	11.9269	Not different
C2_01340W_A	12.2971	12.3621	Not different
C2_02920W_A	12.3986	11.9283	Not different
C2_04590C_A	12.2992	12.5534	Not different
C1_02430C_A	12.4248	13.3086	Not different
CR_03070W_A	12.34	11.5697	Not different
C1_07120W_A	12.4982	13.0227	Not different
CR_10270C_A	12.3264	12.5344	Not different
C5_02900W_A	12.3644	12.6714	Not different
C1_10470W_A	12.4091	12.5728	Not different
C1_13760W_A	12.4259	12.0735	Not different
C4_03050C_A	12.4178	10.9247	Downregulated
C1_07630W_A	12.3183	12.4485	Not different
C7_00700W_A	12.3216	11.844	Not different
C2_04660C_A	12.4071	11.9339	Not different
C7_00050C_A	12.5794	12.366	Not different
C2_01130W_A	12.4939	12.852	Not different
C1_00870W_A	12.4003	10.9213	Downregulated
C1_07090C_A	12.4397	12.2999	Not different
C5_00260W_A	12.4172	13.829	Upregulated
C3_06490W_A	12.3989	10.0267	Downregulated
CR_03600C_A	12.2364	12.5166	Not different
C1_02240W_A	12.4461	12.3134	Not different
C1_04860W_A	12.3415	12.0714	Not different
CR_07520C_A	12.3335	12.5551	Not different
C3_04580C_A	12.4054	12.1445	Not different
C2_04930C_A	12.442	11.0651	Downregulated
C1_08020W_A	12.4331	12.3035	Not different
C4_01510W_A	12.3062	11.5009	Not different
CR_04130C_A	12.469	11.9109	Not different
C1_09350W_A	12.3568	12.7703	Not different
C6_03320W_A	12.1984	10.3334	Downregulated
C3_01030W_A	12.2784	12.8441	Not different
C1_08330C_A	12.2619	11.3203	Not different
C4_00460C_A	12.4161	11.5265	Not different
C5_05300W_A	12.2959	11.9444	Not different
C4_02550C_A	12.3797	12.7473	Not different
C1_05460W_A	12.3565	12.382	Not different
C2_01320W_A	12.3877	12.3485	Not different
C1_00150C_A	12.4538	11.2177	Downregulated
C3_05530W_A	12.2809	12.6759	Not different
C6_02140W_A	12.365	12.2263	Not different
C2_08140C_A	12.4411	12.9345	Not different
C2_09670C_A	12.2855	11.8124	Not different
C1_12850W_A	12.294	10.9093	Downregulated
CR_01730W_A	12.3293	11.1903	Downregulated
C1_06970C_A	12.3026	12.0981	Not different
CR_00080W_A	12.6221	14.3287	Upregulated
C2_03230C_A	12.2815	12.1137	Not different
C1_01300W_A	12.2399	11.673	Not different
C6_00260W_A	12.4598	12.1334	Not different
CR_10060W_A	12.3255	11.2917	Downregulated
C6_01360W_A	12.2697	12.215	Not different
C1_07390W_A	12.3192	12.2469	Not different
C2_07260C_A	12.3132	11.6482	Not different
CR_02620C_A	12.2217	12.962	Not different
C4_00600C_A	12.5021	11.7797	Not different
C3_02600C_A	12.2632	12.3716	Not different
C1_08100W_A	12.2638	13.0605	Not different
C7_00720W_A	12.3171	12.3682	Not different
C5_03090W_A	12.367	12.3667	Not different
C1_05410C_A	12.4082	10.6317	Downregulated
C3_07700W_A	12.2506	12.838	Not different
C3_03490W_A	12.3603	9.59885	Downregulated
CR_02990C_A	12.2998	11.9306	Not different
C6_00160W_A	12.3231	11.2938	Downregulated
C6_00310W_A	12.4011	11.8464	Not different
C1_06130C_A	12.2579	12.229	Not different
C4_02100C_A	12.2039	10.8517	Downregulated
C3_07090W_A	12.2377	12.2717	Not different
CR_02970C_A	12.3362	11.9352	Not different
C3_05000W_A	12.1912	12.7351	Not different
C5_05470W_A	12.3418	12.8195	Not different
C1_10180C_A	12.3586	12.1635	Not different
CR_01680C_A	12.3957	12.1944	Not different
C1_01130W_A	12.3001	11.5958	Not different
C1_02640C_A	12.2156	12.6446	Not different
C3_01750C_A	12.3216	12.3296	Not different
C4_02280W_A	12.2582	12.7582	Not different
CR_03620C_A	12.343	9.07672	Downregulated
C3_07740W_A	12.2424	12.9038	Not different
C4_06690C_A	12.3329	11.8711	Not different
C2_09580W_A	12.3952	12.0911	Not different
CR_00200W_A	12.4105	13.3622	Not different
C5_04000W_A	12.1951	12.6062	Not different
C2_03550C_A	12.3225	12.2525	Not different
CR_06860C_A	12.2475	11.215	Downregulated
C1_13780W_A	12.4065	13.0586	Not different
C3_02940C_A	12.1919	13.4997	Upregulated
C3_01940C_A	12.0691	11.2478	Not different
C7_03600W_A	12.1948	12.3393	Not different
C3_02210C_A	12.2204	12.8281	Not different
CR_07620W_A	12.287	12.345	Not different
C4_02300W_A	12.1896	11.9378	Not different
C6_02380W_A	12.3062	13.4745	Upregulated
C3_02590W_A	12.2281	12.6572	Not different
C5_00670C_A	12.3658	13.1903	Not different
C7_03960C_A	12.2694	11.7254	Not different
C4_00470C_A	12.2541	12.072	Not different
CR_07560W_A	12.321	12.5307	Not different
C7_00880C_A	12.386	11.0603	Downregulated
C1_05160C_A	12.2688	13.3342	Upregulated
CR_01490C_A	12.2481	12.1759	Not different
C1_13510C_A	12.1734	10.9458	Downregulated
C1_06480C_A	12.2085	12.2182	Not different
C2_06880C_A	12.1807	11.5526	Not different
C2_01470W_A	12.2821	12.1405	Not different
CR_10780C_A	12.2858	11.4821	Not different
C4_04440W_A	12.237	12.0166	Not different
C1_05950C_A	12.1902	10.5599	Downregulated
C2_07460W_A	12.2528	11.3714	Not different
C4_03790W_A	12.2469	12.415	Not different
C2_06960W_A	12.2275	13.0412	Not different
C1_10120C_A	12.2519	11.8295	Not different
C5_05170W_A	12.2211	12.4392	Not different
C4_01970W_A	12.1727	11.2166	Not different
CR_05120W_A	12.3107	12.8298	Not different
C4_01410W_A	12.3192	12.4331	Not different
C6_02590C_A	12.1721	11.4561	Not different
C1_12780W_A	12.1961	11.187	Downregulated
CR_09320C_A	12.2772	12.5603	Not different
C1_03070C_A	12.302	12.3245	Not different
C2_05290C_A	12.2026	12.1842	Not different
C3_01210C_A	12.2007	12.1431	Not different
C2_00970C_A	12.2297	12.4529	Not different
C7_00940W_A	12.312	11.8845	Not different
C1_13330C_A	12.2065	11.8732	Not different
C2_09590C_A	12.2443	9.03054	Downregulated
C6_01180C_A	12.1082	9.99159	Downregulated
CR_06050W_A	12.1261	11.8974	Not different
C1_08210C_A	12.3338	13.1113	Not different
C7_00660W_A	12.398	8.97772	Downregulated
C2_06600W_A	12.2075	11.8156	Not different
C1_01470W_A	12.2772	12.2917	Not different
C7_02320W_A	12.121	12.2084	Not different
C3_07500W_A	12.2393	12.7231	Not different
C3_01180C_A	12.4014	11.2451	Downregulated
C4_06230C_A	12.2262	12.1195	Not different
C6_00210W_A	12.2654	11.0254	Downregulated
C6_04540C_A	12.295	11.9253	Not different
C1_07250C_A	12.2297	11.487	Not different
C3_01980C_A	12.2768	12.3037	Not different
C7_04010W_A	12.3495	11.8937	Not different
CR_01260W_A	12.1224	11.2891	Not different
CR_01660C_A	12.1991	12.1587	Not different
C3_04420W_A	12.2249	12.2989	Not different
C1_08990C_A	12.2641	12.0287	Not different
C1_01640W_A	12.1677	13.0641	Not different
C2_04360W_A	12.1909	12.0291	Not different
C2_00700W_A	12.3869	12.644	Not different
C3_01390C_A	12.1237	12.6602	Not different
C4_06100W_A	12.2898	11.769	Not different
CR_09600C_A	12.0935	11.7903	Not different
C6_02190C_A	12.2259	11.9306	Not different
C5_03820C_A	12.1767	13.0055	Not different
C6_04360C_A	12.1357	12.2782	Not different
C1_04200C_A	12.2236	11.4003	Not different
CR_05790C_A	12.4186	13.1653	Not different
C1_01010W_A	12.1724	12.6863	Not different
C1_05490C_A	12.1261	12.3941	Not different
CR_06950C_A	12.0045	10.3748	Downregulated
C1_14320C_A	12.1554	11.5465	Not different
CR_05310W_A	12.058	11.5862	Not different
C6_03180C_A	12.4195	11.4254	Not different
CR_06170W_A	12.1627	11.0445	Downregulated
C1_14170W_A	12.1435	12.396	Not different
C1_13550C_A	12.2075	12.1889	Not different
C2_02310W_A	12.1984	12.8894	Not different
C4_02340W_A	12.1313	10.5436	Downregulated
C3_04290C_A	12.2885	12.4132	Not different
C1_04490W_A	12.1922	12.1514	Not different
C2_08630C_A	12.1767	12.2756	Not different
CR_07350W_A	12.156	11.9082	Not different
C3_00630W_A	12.1134	12.0756	Not different
CR_02300C_A	12.1217	12.116	Not different
C1_05680C_A	12.1085	11.5569	Not different
C1_11920W_A	12.1344	11.4843	Not different
C4_00370W_A	12.1889	11.6828	Not different
C2_00510W_A	12.1186	9.3164	Downregulated
C6_04470C_A	12.2998	11.1624	Downregulated
C2_00770W_A	12.078	10.8719	Downregulated
C2_04780W_A	12.2443	11.684	Not different
CR_06040W_A	12.3035	12.5504	Not different
C1_02860C_A	12.0998	11.9858	Not different
C1_00490C_A	12.1644	11.1792	Not different
C1_10800C_A	12.1196	10.9039	Downregulated
C5_04170W_A	12.245	11.9082	Not different
C3_06120C_A	12.2697	12.7554	Not different
C6_01350W_A	12.1784	11.9246	Not different
C5_05210W_A	12.1486	11.5773	Not different
CR_02460W_A	12.1621	10.7749	Downregulated
C2_01680C_A	12.2925	11.4122	Not different
CR_00440C_A	12.3092	12.2317	Not different
C2_03260W_A	12.0227	11.0291	Not different
C5_03760C_A	12.0773	12.8756	Not different
C3_07040C_A	12.0984	11.5937	Not different
C2_09780C_A	12.0709	11.5857	Not different
C7_03450C_A	12.0576	11.602	Not different
C1_05240C_A	12.1717	11.7686	Not different
C6_01670W_A	12.2447	12.9984	Not different
C1_01450W_A	12.2626	12.7919	Not different
C6_00390W_A	12.157	11.2123	Not different
C4_03130W_A	12.2272	11.6255	Not different
C4_03000C_A	12.1367	7.34121	Downregulated
C1_04760C_A	12.0872	12.204	Not different
C2_07440C_A	12.2827	10.1179	Downregulated
C6_00570C_A	12.2845	12.155	Not different
C3_03590W_A	12.2478	12.8478	Not different
C1_01030W_A	12.1978	13.3443	Upregulated
CR_09070C_A	12.053	11.8722	Not different
C2_02730W_A	12.1401	11.6579	Not different
C2_00470W_A	12.1384	12.3706	Not different
C1_01110C_A	12.1476	13.338	Upregulated
C2_10260C_A	12.0995	10.9306	Downregulated
CR_00130C_A	12.1047	11.7035	Not different
C6_00600C_A	12.2017	12.4897	Not different
C3_06750W_A	12.0695	12.2437	Not different
C3_01500C_A	12.1412	12.1764	Not different
C2_00390C_A	12.0935	11.6543	Not different
C1_08120W_A	12.1503	11.8224	Not different
C2_05680W_A	12.154	11.7899	Not different
C2_02260W_A	12.0602	11.3398	Not different
C5_00090C_A	12.1981	12.1644	Not different
C1_12340C_A	12.1483	12.7214	Not different
C7_04030C_A	12.0897	12.6128	Not different
C3_02950C_A	12.1466	13.1415	Not different
C5_00100C_A	12.058	10.534	Downregulated
CR_10590W_A	12.1687	11.4132	Not different
C1_12740W_A	11.9831	11.8352	Not different
C5_00730W_A	12.2998	11.9778	Not different
C2_09390W_A	12.0755	12.0792	Not different
C1_10780C_A	12.0421	11.2467	Not different
C3_04180W_A	12.1833	12.2704	Not different
C2_10530C_A	12.1863	11.2932	Not different
C7_03830C_A	12.1237	11.0346	Downregulated
C1_12250C_A	12.0967	12.4376	Not different
C1_10070C_A	12.0591	11.816	Not different
C1_01630W_A	12.0011	11.0383	Not different
C3_04990W_A	12.178	12.7853	Not different
C5_00560W_A	11.9694	11.9685	Not different
C1_13900C_A	12.2108	12.5897	Not different
C7_01490W_A	12.0326	11.4852	Not different
C1_09520C_A	12.1065	11.2317	Not different
C5_00630C_A	12.0623	12.9075	Not different
C3_05030W_A	12.111	12.2753	Not different
C5_02180C_A	12.2469	12.4411	Not different
C3_06140W_A	12.0271	11.3458	Not different
CR_08600C_A	12.1717	11.6619	Not different
C1_04700C_A	12.0991	10.4142	Downregulated
C5_05020C_A	11.9678	12.75	Not different
C6_02740W_A	12.0201	12.428	Not different
C1_01270W_A	12.1543	11.4436	Not different
C3_03890W_A	12.1303	12.1099	Not different
C4_02430W_A	12.0823	12.1556	Not different
C5_03570W_A	12.1023	11.285	Not different
C5_00130C_A	11.9747	12.8158	Not different
C4_00390W_A	12.1244	11.6267	Not different
CR_09860W_A	12.1994	11.6406	Not different
C4_03850W_A	11.9985	11.9994	Not different
C7_02330W_A	12.1364	12.28	Not different
CR_02050C_A	12.182	12.2628	Not different
CR_01080W_A	12.134	12.0819	Not different
C1_10720C_A	12.183	11.9173	Not different
C3_00720W_A	12.3547	12.7394	Not different
C5_02650C_A	12.1813	12.1596	Not different
CR_04480C_A	12.0918	10.1097	Downregulated
C1_10230C_A	12.068	11.559	Not different
C7_01580W_A	12.078	11.9349	Not different
C5_01780W_A	12.0784	12.0732	Not different
C1_02250W_A	12.0773	9.92937	Downregulated
C4_00380W_A	12.1141	11.7511	Not different
C2_09150W_A	12.1019	11.7058	Not different
C1_00380C_A	12.0851	12.1505	Not different
C4_04410C_A	12.1418	12.1604	Not different
C2_04130W_A	12.0851	11.4561	Not different
C6_01860C_A	12.0851	12.5607	Not different
C4_00330C_A	12.037	12.5863	Not different
C1_05850W_A	12.0011	11.6654	Not different
C2_04020C_A	12.0414	11.3493	Not different
C1_13960W_A	12.0145	12.2231	Not different
C1_08240C_A	12.0501	10.0609	Downregulated
C6_01710C_A	12.201	11.9319	Not different
C7_04310C_A	12.2033	11.1942	Downregulated
C1_01750W_A	12.158	11.222	Not different
C2_00370W_A	12.112	11.8625	Not different
C1_01100W_A	11.9697	11.9428	Not different
C2_00730C_A	12.2091	11.8117	Not different
C1_06700W_A	12.1439	11.92	Not different
C3_02760C_A	12.1554	12.3253	Not different
CR_03000C_A	12.0826	10.6639	Downregulated
CR_07020W_A	12.1075	12.9363	Not different
C6_01850W_A	12.113	11.5543	Not different
C1_07970C_A	12.0216	12.021	Not different
C5_03400C_A	12.0493	12.2155	Not different
C7_03160W_A	12.0479	12.0967	Not different
C1_06020W_A	12.0064	11.7808	Not different
C2_00610C_A	11.9482	12.8362	Not different
C3_07670W_A	11.9955	11.9322	Not different
CR_09310W_A	11.9891	11.9326	Not different
CR_05030W_A	12.0587	12.0349	Not different
C2_07540W_A	12.0815	12.4937	Not different
C1_01910W_A	12.054	12.5476	Not different
C4_01730C_A	11.9831	11.8124	Not different
C3_06270C_A	11.8984	11.6844	Not different
C6_00780W_A	12.0716	11.9223	Not different
C7_03320C_A	12.0242	11.7432	Not different
C3_07230W_A	12.0461	12.6538	Not different
C6_00200C_A	12.0308	11.4575	Not different
C5_05110C_A	12.0134	12.129	Not different
C7_03390C_A	12.0056	11.9597	Not different
C2_02320C_A	11.9505	11.6883	Not different
C5_00490C_A	11.92	12.4046	Not different
C5_04060C_A	11.9884	12.3253	Not different
C6_01980C_A	12.0805	12.5093	Not different
C4_06850C_A	12.0974	12.9035	Not different
C1_06400C_A	12.159	11.6349	Not different
C5_02530W_A	11.9016	12.7976	Not different
CR_08040W_A	11.9458	11.2013	Not different
C2_07350W_A	12.1103	11.6446	Not different
C2_10110W_A	12.0242	13.3107	Upregulated
C6_01740C_A	12.0712	12.0487	Not different
C4_07200C_A	12.0851	12.1244	Not different
C7_00300W_A	12.0071	11.4739	Not different
C1_00890W_A	11.9682	11.7383	Not different
C5_00570W_A	12.0641	12.5764	Not different
CR_09440C_A	12.0333	11.4046	Not different
C6_00950C_A	12.0594	11.8527	Not different
C3_03560W_A	12.0282	12.1198	Not different
C7_03020C_A	11.9337	11.8249	Not different
C4_04510W_A	12.1051	11.5718	Not different
C3_00830C_A	11.9736	12.7336	Not different
C2_05170W_A	12.0403	11.2683	Not different
C2_07940C_A	11.9286	11.7023	Not different
CR_02530W_A	12.155	13.7819	Upregulated
C6_04350C_A	12.3038	12.0928	Not different
C6_00670W_A	12.0352	11.5845	Not different
C1_01830C_A	12.0179	11.2777	Not different
C1_13170C_A	12.1155	12.1508	Not different
CR_00070W_A	12.2722	11.3596	Not different
C3_06020W_A	11.9895	12.537	Not different
C3_05560W_A	11.9016	12.4364	Not different
C3_00470W_A	11.9981	12.1397	Not different
C2_07660W_A	11.9172	11.8281	Not different
C2_06110W_A	11.8676	11.2793	Not different
C7_02970W_A	12.0522	11.8217	Not different
CR_00570W_A	12.0271	12.3657	Not different
C6_00760W_A	11.9416	11.669	Not different
CR_03900W_A	12.0414	11.7151	Not different
CR_01000C_A	12.0493	11.8566	Not different
C1_05780W_A	12.1189	12.0827	Not different
C1_03790C_A	12.0275	14.1741	Upregulated
C2_03500W_A	12.0026	12.321	Not different
C3_04920C_A	11.9732	11.868	Not different
C5_04360C_A	11.9341	11.0627	Not different
C1_11760C_A	11.8737	12.118	Not different
CR_01180W_A	11.8398	11.5383	Not different
C1_08160W_A	11.9709	11.8454	Not different
C1_00130C_A	12.0995	11.8913	Not different
C3_04490W_A	11.9667	12.6191	Not different
CR_02670C_A	12.1607	10.7903	Downregulated
C1_09070W_A	11.8684	11.8084	Not different
C7_03420C_A	11.9144	10.0242	Downregulated
C5_00880C_A	11.898	12.1014	Not different
C1_04780C_A	11.9369	11.7204	Not different
C1_10700C_A	11.8786	11.3303	Not different
CR_01210C_A	12.0769	11.5564	Not different
C3_00570C_A	12.0227	12.4696	Not different
C1_10440W_A	11.9605	11.6718	Not different
C1_03300C_A	12.0326	12.0783	Not different
C7_00010C_A	12.1584	11.8859	Not different
CR_03150W_A	11.9	11.5874	Not different
C1_13280C_A	11.9609	12.2501	Not different
C2_05910W_A	12.0127	11.7605	Not different
CR_08700C_A	11.8729	11.1213	Not different
C3_06470W_A	12.1506	11.3433	Not different
C4_00650W_A	11.9172	12.4254	Not different
C2_09820W_A	12.0508	8.69254	Downregulated
C3_03720W_A	11.9517	11.5322	Not different
C1_10270C_A	11.9318	11.5213	Not different
C1_13110C_A	12.0727	12.681	Not different
C4_01200C_A	11.9663	12.4115	Not different
CR_05650W_A	11.8944	11.7078	Not different
CR_02430C_A	11.9575	11.8601	Not different
C3_06230W_A	12.0598	12.4266	Not different
C1_04020C_A	11.8944	10.1915	Downregulated
C3_02430W_A	11.9474	12.5964	Not different
C4_03800C_A	11.9423	12.1897	Not different
C1_02880C_A	12.0175	12.4198	Not different
CR_03460W_A	11.8988	11.4292	Not different
C7_01660C_A	12.0417	12.396	Not different
C1_07700C_A	11.933	12.6576	Not different
C4_07240W_A	12.0602	11.6539	Not different
C5_01420W_A	11.938	10.4395	Downregulated
C3_06250W_A	11.8394	12.2122	Not different
C3_07170C_A	11.9918	12.8654	Not different
C3_04560W_A	12.1641	14.0561	Upregulated
C5_02700W_A	11.9493	11.8794	Not different
CR_06780W_A	11.8717	11.7571	Not different
CR_01390W_A	12.0157	12.0925	Not different
C1_06820W_A	11.9717	11.3567	Not different
CR_10010C_A	12.0744	12.4526	Not different
C7_01340W_A	11.9505	11.8628	Not different
C1_04670W_A	11.8948	11.6272	Not different
C3_01600W_A	12.0105	12.0545	Not different
C2_06870C_A	11.9341	9.2543	Downregulated
C1_05750C_A	11.9659	11.8618	Not different
CR_08550W_A	11.952	12.0798	Not different
C2_02450C_A	12.0587	13.56	Upregulated
C3_03880C_A	11.9349	11.9226	Not different
CR_05990C_A	12.1784	11.7428	Not different
C4_07090C_A	11.9489	12.7307	Not different
C3_06710W_A	11.9955	12.0435	Not different
C3_04760C_A	12.0238	13.461	Upregulated
C2_05760C_A	11.9092	12.3114	Not different
C7_04050W_A	11.9816	11.5582	Not different
CR_09510C_A	11.8268	12.3748	Not different
C2_05820W_A	11.7822	10.0378	Downregulated
C4_07230C_A	12.3092	11.7682	Not different
C2_08850C_A	11.9345	10.7436	Downregulated
C2_09620W_A	11.9243	11.7224	Not different
C5_04570C_A	12.0659	14.2161	Upregulated
C1_08230C_A	12.0049	9.73694	Downregulated
C4_05550C_A	11.8539	11.9768	Not different
C5_01070C_A	12.0634	11.0512	Downregulated
CR_05970C_A	12.0245	11.6726	Not different
C1_04600C_A	11.977	12.5568	Not different
C4_01440W_A	11.836	12.0789	Not different
CR_08930C_A	11.8581	11.8566	Not different
CR_07390C_A	12.009	12.4531	Not different
C3_05360C_A	11.916	11.8309	Not different
C3_04130W_A	11.8452	11.222	Not different
C1_14080W_A	12.0791	13.0566	Not different
C3_03510C_A	11.9128	11.6922	Not different
CR_09370W_A	12.0289	13.2172	Upregulated
C5_00170W_A	11.9625	12.3972	Not different
C1_09380W_A	11.7514	11.2013	Not different
C1_04000C_A	11.8502	11.0023	Not different
C7_01320W_A	11.9326	11.235	Not different
CR_04580W_A	11.9921	12.4254	Not different
C2_05580W_A	11.9808	11.8106	Not different
C1_09360C_A	11.896	12.215	Not different
C6_03300C_A	11.8498	11.9283	Not different
C1_07140C_A	11.9793	12.5389	Not different
CR_05530C_A	12.0289	12.0887	Not different
C1_05140W_A	12.0847	9.99792	Downregulated
CR_01300W_A	11.7514	12.4775	Not different
C4_07250C_A	11.8717	11.2865	Not different
C2_10760C_A	11.9918	11.8934	Not different
CR_03740C_A	11.7769	11.8763	Not different
C5_02580W_A	11.773	12.4219	Not different
CR_02850C_A	11.9621	10.9438	Downregulated
C1_00640C_A	12.1261	12.8956	Not different
C5_00980W_A	11.8012	12.0456	Not different
C2_08270C_A	11.9544	11.7008	Not different
C4_00310C_A	11.9505	11.9143	Not different
C6_03080C_A	11.8046	12.665	Not different
C5_01850C_A	11.954	12.3478	Not different
C1_13640W_A	11.9555	11.8991	Not different
C6_02430W_A	11.9891	11.921	Not different
C5_05310W_A	11.8655	12.7432	Not different
C7_00570W_A	12.058	13.7865	Upregulated
C2_03390C_A	11.9478	11.7197	Not different
C4_03080W_A	11.8106	12.306	Not different
CR_06570C_A	11.844	9.48269	Downregulated
C1_09860C_A	11.8839	11.4146	Not different
C3_01360C_A	11.902	12.7322	Not different
C1_13270W_A	11.7695	10.6774	Downregulated
C3_02500W_A	11.817	12.9018	Upregulated
C7_04090C_A	11.9705	9.73996	Downregulated
C1_09020W_A	11.7835	12.9231	Upregulated
C1_03600W_A	11.7878	11.7657	Not different
C5_02480W_A	11.9032	11.9503	Not different
C1_01540W_A	11.8272	11.4924	Not different
C3_06110C_A	12.003	12	Not different
C3_07220C_A	11.7835	13.3775	Upregulated
C5_02560C_A	11.8498	11.5309	Not different
C3_01510W_A	11.9458	11.8903	Not different
C4_01190W_A	11.959	11.6082	Not different
C1_02230W_A	12.0311	11.9176	Not different
C2_04380C_A	11.8213	12.1311	Not different
CR_04070W_A	11.7804	10.5462	Downregulated
C4_02000C_A	11.9012	12.721	Not different
CR_02810W_A	11.87	9.88635	Downregulated
C7_02300W_A	11.8145	11.4207	Not different
CR_03250C_A	11.9621	12.6751	Not different
C7_00410C_A	12.0286	11.651	Not different
CR_10660W_A	11.8928	11.9813	Not different
CR_09590W_A	11.7496	11.4543	Not different
C1_01600W_A	11.8556	12.6957	Not different
C4_01290W_A	11.916	11.0179	Not different
CR_00850C_A	11.8814	11.3045	Not different
C1_08760W_A	11.7357	11.0518	Not different
C5_02190C_A	11.8102	13.0374	Upregulated
C5_02340C_A	12.0319	12.7006	Not different
CR_09230C_A	11.8136	11.5564	Not different
C2_07470W_A	11.8647	11.7877	Not different
C5_01410C_A	11.8729	12.2709	Not different
C4_04660C_A	11.9439	11.9984	Not different
CR_02950C_A	11.8029	12.2057	Not different
C1_04540C_A	11.7598	11.6726	Not different
C2_05030C_A	11.8581	11.9266	Not different
C5_00900C_A	11.8029	12.9715	Upregulated
CR_00110W_A	11.8335	11.5849	Not different
C5_00820W_A	11.9184	13.2258	Upregulated
C6_03430C_A	11.7531	12.0169	Not different
CR_09990W_A	11.952	11.6438	Not different
C3_02240C_A	11.9152	11.9196	Not different
C1_08670W_A	11.8153	11.8947	Not different
C2_09680W_A	11.7424	10.926	Not different
C5_04680W_A	11.7809	11.9143	Not different
C4_04460C_A	11.9455	12.042	Not different
C1_00960C_A	11.8639	11.667	Not different
CR_09240C_A	11.7112	11.6883	Not different
C1_08080C_A	11.7339	12.0447	Not different
C3_00330W_A	11.9732	12.9234	Not different
C1_09200W_A	11.8343	11.3193	Not different
C1_04810W_A	11.9088	11.6239	Not different
C1_13120C_A	11.7002	11.6144	Not different
C1_14350W_A	11.7393	10.8608	Not different
C5_03680W_A	11.8696	11.8422	Not different
C1_03460C_A	11.8904	11.0645	Not different
C1_13610C_A	12.0082	11.2041	Not different
C4_03890W_A	11.6788	11.3936	Not different
C6_04580W_A	11.8729	11.556	Not different
C5_00330C_A	11.7852	11.8653	Not different
C4_05090C_A	11.7761	11.3912	Not different
CR_07780W_A	11.8123	11.5692	Not different
CR_07460C_A	11.8204	12.1394	Not different
C5_02490C_A	11.8268	13.3707	Upregulated
C4_01080W_A	11.9207	12.3022	Not different
C2_04720C_A	11.8352	10.9093	Not different
C7_03840W_A	11.6844	12.1299	Not different
C5_00640C_A	11.7917	12.6928	Not different
C7_03120W_A	11.8568	12.2753	Not different
C1_14100W_A	11.8055	11.4721	Not different
C2_06860W_A	11.7267	11.9249	Not different
C7_00980W_A	11.8968	11.8019	Not different
C1_06630W_A	11.8089	11.6694	Not different
CR_08200C_A	11.929	11.8073	Not different
C6_01590W_A	11.9439	11.9146	Not different
C1_12430W_A	11.7835	11.1195	Not different
CR_08490W_A	12.0921	13.6815	Upregulated
C3_00640W_A	11.7991	12.4013	Not different
C3_03180C_A	11.7249	11.8238	Not different
C1_00120C_A	11.8725	11.3493	Not different
C1_11210C_A	11.9032	10.9724	Not different
C1_07590C_A	11.7843	11.8309	Not different
C6_04220C_A	11.7053	10.858	Not different
C1_14590C_A	11.8132	10.7845	Downregulated
C3_06970W_A	11.7447	12.8343	Upregulated
C1_06110C_A	11.683	11.876	Not different
C2_07120W_A	11.7611	11.4938	Not different
C6_02880W_A	11.8089	12.4397	Not different
C1_01400C_A	11.7965	11.365	Not different
C2_10680W_A	11.8314	10.8726	Not different
C1_07190W_A	11.9493	11.6276	Not different
C6_02630C_A	11.8597	11.6037	Not different
C7_01720W_A	11.6619	11.0878	Not different
C6_03620C_A	11.8042	10.9399	Not different
CR_03910C_A	11.9243	11.2446	Not different
CR_01320C_A	11.9124	11.1831	Not different
C4_04350W_A	11.66	11.3318	Not different
C3_03300C_A	11.9004	12.0315	Not different
C4_01100C_A	11.9259	10.3894	Downregulated
C2_07090C_A	11.8343	10.9794	Not different
C4_07100C_A	11.8427	12.0163	Not different
CR_07180W_A	11.823	11.8084	Not different
C5_01650C_A	11.7294	12.4041	Not different
C6_03100W_A	11.8465	12.0981	Not different
CR_06640C_A	11.7673	10.417	Downregulated
C1_14220C_A	11.8597	12.6357	Not different
CR_08450C_A	11.9455	11.9276	Not different
C5_00580W_A	11.7761	11.6969	Not different
[truncated: 3,761 more rows]

## Sheet: NaiveVsL3_YPD_2FC_DEG
gene	A10_YPD	H1_YPD	DEG
C3_06870W_A	20.9425	20.9577	Not different
C4_06570C_A	20.3063	20.3222	Not different
C4_01750C_A	20.0213	20.0692	Not different
C1_08500C_A	19.9492	19.9123	Not different
C2_05460W_A	19.8567	19.9048	Not different
C5_05050W_A	19.6712	19.7361	Not different
C2_03270W_A	18.9458	18.8682	Not different
C4_02370C_A	18.7175	18.6208	Not different
C6_00750C_A	18.5297	18.5677	Not different
CR_04510W_A	18.5269	18.554	Not different
C7_01800C_A	18.5251	18.5509	Not different
C5_04810W_A	18.1278	18.2971	Not different
C3_04060C_A	17.8928	18.075	Not different
CR_08090W_A	18.0592	17.8943	Not different
C2_01000W_A	18.0942	18.0634	Not different
C2_03100W_A	17.9151	17.8823	Not different
C4_02390W_A	17.8622	17.6937	Not different
C3_07440W_A	17.5531	17.7394	Not different
C1_08380W_A	17.632	17.7393	Not different
C1_08360C_A	17.6749	17.6519	Not different
CR_06340C_A	17.6565	17.7036	Not different
C1_06580W_A	17.4389	17.4137	Not different
C1_00180W_A	17.4346	17.4336	Not different
C2_05700W_A	17.2586	17.3476	Not different
C1_09190C_A	17.1288	17.2533	Not different
C3_00320W_A	17.0761	17.2942	Not different
C1_03090W_A	17.1013	16.9971	Not different
C1_03020C_A	17.0652	16.989	Not different
C2_08370C_A	16.9709	17.277	Not different
C1_11060C_A	16.9659	16.9251	Not different
C1_03110W_A	16.8936	16.7325	Not different
C1_08590C_A	16.8624	17.1285	Not different
C3_05240C_A	16.8382	16.8221	Not different
C3_05370C_A	16.843	16.8149	Not different
C5_01580C_A	17.0011	16.954	Not different
C1_14110C_A	16.9156	16.8947	Not different
C3_04670C_A	16.8744	16.848	Not different
C7_02030W_A	16.926	16.9134	Not different
C3_01490W_A	16.7784	16.7553	Not different
C2_03810C_A	16.8363	16.7327	Not different
C2_07570W_A	16.771	16.853	Not different
C6_01970C_A	16.7519	16.8515	Not different
C2_09430W_A	16.7547	16.7773	Not different
C3_04500C_A	16.73	16.7067	Not different
CR_08150W_A	16.6342	16.5775	Not different
C1_03220C_A	16.6724	16.681	Not different
C2_08290C_A	16.5724	16.5424	Not different
C1_02460W_A	16.7046	16.6745	Not different
C2_10620W_A	16.6628	16.7166	Not different
C2_01610C_A	16.6727	16.695	Not different
C3_04830C_A	16.7125	16.775	Not different
C2_05610C_A	16.5866	16.6821	Not different
C1_06450C_A	16.5821	16.5876	Not different
CR_00780C_A	16.5926	16.7376	Not different
C7_01790C_A	16.5817	16.6443	Not different
C1_05720W_A	16.635	16.6047	Not different
C2_02860W_A	16.5332	16.6959	Not different
C1_01350C_A	16.6245	16.576	Not different
C5_03540C_A	16.5693	16.5115	Not different
C5_00190C_A	16.5484	16.6381	Not different
C4_01270W_A	16.4569	16.5359	Not different
C1_13860C_A	16.6251	16.7053	Not different
C3_07950C_A	16.5567	16.5136	Not different
C2_08040C_A	16.4729	16.4625	Not different
C3_04810C_A	16.5004	16.4941	Not different
C7_00960W_A	16.4491	16.3917	Not different
C4_00270W_A	16.5067	16.4435	Not different
C1_04300C_A	16.4982	16.5489	Not different
CR_03030C_A	16.411	16.4948	Not different
C2_03820C_A	16.3995	16.3784	Not different
C7_01250W_A	16.404	16.4178	Not different
C1_03030W_A	16.4237	16.3803	Not different
C5_03070W_A	16.4245	16.4539	Not different
C6_01610W_A	16.3327	16.3814	Not different
CR_04100C_A	16.2836	16.3243	Not different
C2_08590W_A	16.4377	16.4567	Not different
CR_10840C_A	16.3146	16.1942	Not different
CR_07790C_A	16.0912	16.0551	Not different
C1_08790W_A	16.1817	16.2343	Not different
C3_02110W_A	16.148	16.2205	Not different
C1_10870W_A	16.1907	16.2224	Not different
C1_13700W_A	16.193	16.2644	Not different
C6_02240C_A	16.0993	16.1654	Not different
C3_05100C_A	16.1821	16.1556	Not different
C2_03010C_A	16.0505	16.2894	Not different
C3_04960W_A	16.0542	15.9627	Not different
C3_05200W_A	16.0963	16.0203	Not different
C1_12390C_A	16.1006	16.1004	Not different
C3_00090W_A	16.1982	16.103	Not different
C4_04890C_A	16.0162	16.0939	Not different
CR_05340C_A	16.0112	16.0623	Not different
C4_07180W_A	16.0966	16.2464	Not different
CR_10250C_A	16.0693	16.1498	Not different
C1_13620W_A	16.0999	16.0016	Not different
C1_04400C_A	16.1172	16.0835	Not different
C1_03380W_A	16.0678	16.1288	Not different
C1_09250W_A	15.9437	16.1226	Not different
C1_03190C_A	16.0047	15.9479	Not different
C2_05710C_A	15.9515	16.0641	Not different
C7_01650W_A	15.906	16.074	Not different
C1_03010W_A	15.9116	15.9997	Not different
CR_04090C_A	15.9944	15.8871	Not different
C1_01480C_A	15.9595	15.9817	Not different
C2_10690W_A	15.9773	15.995	Not different
CR_00860C_A	15.8285	15.8785	Not different
C2_04600C_A	15.8425	16.0357	Not different
C4_01520C_A	15.8172	15.9032	Not different
C1_09720W_A	15.8942	15.9907	Not different
CR_03720W_A	15.8522	15.9647	Not different
C1_04100C_A	15.7977	15.8477	Not different
CR_07630C_A	15.7547	15.9145	Not different
C1_00060W_A	15.9881	15.8187	Not different
C1_08070W_A	15.8345	15.7216	Not different
C3_01540W_A	15.689	15.7636	Not different
C6_03760C_A	15.7155	15.6639	Not different
C2_05410W_A	15.6865	15.7963	Not different
C7_00990W_A	15.7638	15.6551	Not different
C1_13480W_A	15.7887	15.8682	Not different
C4_04900W_A	15.5903	15.6745	Not different
CR_00640W_A	15.6626	15.7679	Not different
C4_04480C_A	15.6406	15.5885	Not different
C1_13050W_A	15.5852	15.5434	Not different
C1_04680W_A	15.5804	15.6409	Not different
C1_04610W_A	15.7069	15.6052	Not different
C6_01700W_A	15.5949	15.7568	Not different
C1_08320W_A	15.6826	15.7418	Not different
C7_02380C_A	15.5517	15.6598	Not different
C3_02470C_A	15.4646	15.4704	Not different
C2_07380W_A	15.7262	15.708	Not different
C1_13140C_A	15.623	15.3785	Not different
C2_08810C_A	15.5515	15.5701	Not different
C2_00210W_A	15.5369	15.6573	Not different
C1_10390C_A	15.47	15.5424	Not different
CR_01620C_A	15.656	15.4625	Not different
CR_07150W_A	15.5622	15.5648	Not different
C3_07410C_A	15.5374	15.5476	Not different
C1_04290C_A	15.5348	15.6186	Not different
C5_03900W_A	15.4679	15.447	Not different
C7_01640W_A	15.5351	15.421	Not different
C3_06700C_A	15.4877	15.5822	Not different
C6_02010C_A	15.3285	15.6577	Not different
C2_03160C_A	15.3757	15.7295	Not different
C5_00660C_A	15.3578	15.6524	Not different
C3_07310C_A	15.5564	15.6068	Not different
C3_03900C_A	15.4194	15.3887	Not different
C4_02410C_A	15.3158	15.5815	Not different
C1_10790W_A	15.4619	15.5744	Not different
C6_02070C_A	15.3083	15.2809	Not different
C1_01360C_A	15.467	15.4443	Not different
C1_11650W_A	15.3353	15.3271	Not different
C1_03370W_A	15.51	15.4573	Not different
C4_01900C_A	15.3923	15.3264	Not different
C7_02600C_A	15.2968	15.5321	Not different
C3_04090W_A	15.328	15.437	Not different
C3_06010W_A	15.2213	15.2434	Not different
C6_01910W_A	15.2264	15.1367	Not different
C1_06890C_A	15.2043	15.3468	Not different
C3_00550C_A	15.3841	15.5286	Not different
C1_11360W_A	15.2567	15.2712	Not different
C4_00160C_A	15.3157	15.3723	Not different
C2_01120W_A	15.3606	15.4211	Not different
CR_04810W_A	15.1612	15.2748	Not different
C1_14290C_A	15.3725	15.3968	Not different
C5_04300C_A	15.276	15.2329	Not different
C3_07270C_A	15.2228	15.3493	Not different
C3_03420C_A	15.2343	15.3541	Not different
CR_00910W_A	15.1613	15.2908	Not different
C3_04550C_A	15.2119	15.1294	Not different
C3_07150C_A	15.0913	15.2849	Not different
C6_00330C_A	15.2762	15.242	Not different
CR_10680W_A	15.4077	15.4031	Not different
C4_07110C_A	15.226	15.0981	Not different
C7_00930W_A	15.2261	15.3522	Not different
C1_13680C_A	15.0982	15.2031	Not different
CR_02820W_A	15.0382	15.3091	Not different
CR_05050W_A	15.1193	15.0412	Not different
C2_00250W_A	15.082	15.1762	Not different
C5_05440C_A	15.2837	15.2766	Not different
CR_04590C_A	15.0255	15.078	Not different
CR_08210C_A	15.1691	15.0681	Not different
C3_02480C_A	15.0038	15.1336	Not different
C1_04260W_A	15.0599	15.1635	Not different
C5_05230C_A	15.0307	14.9226	Not different
C4_01050C_A	15.0228	15.1658	Not different
C6_00870C_A	15.0451	14.8776	Not different
C4_04590W_A	15.0289	15.2086	Not different
C2_03180C_A	15.0034	15.1059	Not different
C3_06500W_A	15.0746	15.2036	Not different
CR_05670C_A	15.0417	14.9469	Not different
C2_10030C_A	15.1349	15.1508	Not different
C5_04130C_A	15.3061	15.1454	Not different
C2_01020W_A	15.1619	15.0332	Not different
C2_06310C_A	14.9523	15.1152	Not different
C1_04890W_A	14.9765	15.097	Not different
C2_09060C_A	15.0422	15.0909	Not different
CR_10850C_A	15.0119	14.8962	Not different
C1_11200W_A	14.9615	14.9846	Not different
C5_05480W_A	14.9709	15.0981	Not different
C3_04680W_A	15.0059	15.0585	Not different
C5_03510C_A	14.996	15.2021	Not different
CR_01760C_A	14.922	14.9433	Not different
CR_04210C_A	15.0297	14.9742	Not different
C2_03380W_A	15.1409	15.1352	Not different
CR_07400C_A	15.0027	14.9819	Not different
C1_06900C_A	14.9477	14.9391	Not different
C1_11860W_A	14.9816	15.0944	Not different
C1_05300C_A	14.8894	14.952	Not different
C3_03800W_A	15.0033	15.0458	Not different
C4_04700W_A	14.9685	14.9132	Not different
C6_04380W_A	15.0455	14.9893	Not different
C1_10840C_A	14.9156	14.9411	Not different
C7_02840C_A	14.9204	15.059	Not different
C1_08740C_A	14.9952	14.9904	Not different
C4_01700C_A	14.779	15.0582	Not different
C1_00210C_A	14.9032	14.9497	Not different
CR_08460W_A	14.7682	14.8172	Not different
C6_04520W_A	15.0225	15.059	Not different
C3_01810C_A	14.921	14.9661	Not different
C7_03670W_A	14.8269	14.7949	Not different
C3_04950W_A	14.8486	14.8541	Not different
C2_04950C_A	14.8851	14.8142	Not different
C1_12050W_A	14.8619	14.9915	Not different
C2_09720W_A	14.9309	14.9287	Not different
CR_04660C_A	14.7972	14.8425	Not different
C3_00460W_A	14.847	14.7344	Not different
C4_05460C_A	14.768	14.8624	Not different
C1_06100C_A	14.8291	14.8341	Not different
C1_04170C_A	14.7812	14.7197	Not different
CR_01690C_A	14.8845	14.9394	Not different
C1_06930W_A	15.0431	15.052	Not different
C4_01530C_A	14.7534	14.8744	Not different
C1_03510C_A	14.8235	14.9086	Not different
CR_08810W_A	14.8719	15.0816	Not different
C1_06460C_A	14.7526	14.791	Not different
C2_02930C_A	14.7682	14.9153	Not different
CR_08360C_A	14.7534	14.6989	Not different
C7_03250C_A	14.8002	14.8391	Not different
C3_00850C_A	14.9342	14.8747	Not different
C1_09640W_A	14.7598	14.7736	Not different
C1_00070W_A	14.8787	14.6943	Not different
CR_09970W_A	14.7521	14.8838	Not different
C2_06810C_A	14.7349	14.785	Not different
CR_09330C_A	14.7544	14.8641	Not different
C1_08460C_A	14.8303	14.8631	Not different
C1_11660W_A	14.7389	14.8278	Not different
C5_02380W_A	14.7164	14.7443	Not different
C1_12360C_A	14.6199	14.7765	Not different
C1_10450W_A	14.7127	14.7753	Not different
CR_05390W_A	14.7464	14.707	Not different
C4_02270C_A	14.714	14.7629	Not different
C2_06570C_A	14.6204	14.8938	Not different
CR_08250C_A	14.7954	14.7377	Not different
C2_06730W_A	14.7233	14.7425	Not different
C1_08090C_A	14.902	14.9436	Not different
C5_03280W_A	14.5961	14.6819	Not different
C4_02940W_A	14.8424	14.77	Not different
C1_07870C_A	14.6367	14.751	Not different
C7_02610C_A	14.5538	14.6356	Not different
C1_06470W_A	14.6289	14.7161	Not different
C1_00590W_A	14.8094	14.7393	Not different
C1_08350C_A	14.5674	14.7399	Not different
C1_14440C_A	14.7693	14.6437	Not different
C6_00290W_A	14.812	14.6928	Not different
CR_09160C_A	14.5889	14.7503	Not different
C5_01910W_A	14.6432	14.6798	Not different
C4_00220C_A	14.6541	14.6867	Not different
C7_03920C_A	14.6367	14.6085	Not different
C3_03410C_A	14.7986	14.9104	Not different
CR_06150C_A	14.6576	14.4595	Not different
C5_00110C_A	14.7599	14.752	Not different
CR_02070C_A	14.7061	14.7835	Not different
C6_02120W_A	14.6291	14.7454	Not different
CR_05780W_A	14.619	14.563	Not different
C1_10820C_A	14.5332	14.655	Not different
C2_08760C_A	14.8075	14.7172	Not different
CR_08300C_A	14.6594	14.7414	Not different
C5_05410C_A	14.7273	14.665	Not different
C4_02440C_A	14.6159	14.5957	Not different
C1_00220W_A	14.7821	14.8552	Not different
C7_04230W_A	14.8197	14.6762	Not different
C1_14280C_A	14.6458	14.5781	Not different
C1_02120C_A	14.6031	14.3275	Not different
C1_01370C_A	14.4449	14.5171	Not different
C2_08300C_A	14.4959	14.5464	Not different
C2_10560C_A	14.5793	14.36	Not different
C4_04150C_A	14.5667	14.6079	Not different
C1_14500C_A	14.5971	14.4739	Not different
CR_03170W_A	14.6113	14.6594	Not different
C5_04590C_A	14.5444	14.6173	Not different
C1_05110C_A	14.6062	14.5882	Not different
CR_01470W_A	14.4525	14.4519	Not different
C7_00620W_A	14.5627	14.5717	Not different
C2_04310W_A	14.5067	14.6309	Not different
C5_00590W_A	14.5234	14.3783	Not different
C6_00650C_A	14.4081	14.4121	Not different
CR_10360C_A	14.4449	14.6336	Not different
C5_00370W_A	14.5372	14.6743	Not different
C1_09630W_A	14.5149	14.4496	Not different
C1_09680W_A	14.576	14.67	Not different
C1_05290W_A	14.5503	14.5988	Not different
C1_10040W_A	14.4454	14.5286	Not different
CR_01440C_A	14.4663	14.5002	Not different
CR_02570C_A	14.3898	14.5287	Not different
C1_04180W_A	14.2962	14.4372	Not different
C2_06640C_A	14.4821	14.5296	Not different
CR_09880W_A	14.6945	14.6749	Not different
C1_11670W_A	14.5341	14.5929	Not different
C2_06100W_A	14.5158	14.5854	Not different
C4_05140C_A	14.4403	14.726	Not different
C3_04140C_A	14.3906	14.4122	Not different
C4_05670W_A	14.4766	14.5422	Not different
C4_04870C_A	14.5248	14.526	Not different
C7_00340C_A	14.486	14.5698	Not different
C1_04240C_A	14.3603	14.4252	Not different
C5_02940C_A	14.553	14.2628	Not different
C5_00930C_A	14.3878	14.4919	Not different
C3_07020W_A	14.7598	14.6791	Not different
C7_04300W_A	14.6167	14.5816	Not different
C1_08980C_A	14.3623	14.5281	Not different
C7_03660C_A	14.4045	14.4589	Not different
C5_02860C_A	14.4157	14.4994	Not different
C4_06610C_A	14.487	14.4851	Not different
C1_04320W_A	14.2903	14.4774	Not different
CR_06800C_A	14.2908	14.4454	Not different
C6_00720C_A	14.4685	14.564	Not different
CR_03060W_A	14.4128	14.3438	Not different
C7_00350C_A	14.3858	14.3448	Not different
C1_12770W_A	14.4079	14.3593	Not different
C7_00440C_A	14.4016	14.4475	Not different
C7_00710W_A	14.3412	14.3976	Not different
CR_04190W_A	14.4062	14.3428	Not different
C4_03280W_A	14.2983	14.3914	Not different
C3_04430W_A	14.3717	14.3994	Not different
CR_10350C_A	14.2477	14.3613	Not different
C7_01920W_A	14.419	14.4753	Not different
CR_10160W_A	14.3797	14.4133	Not different
C3_06440W_A	14.4769	14.4391	Not different
CR_09270C_A	14.3166	14.4368	Not different
C2_04870C_A	14.4315	14.4664	Not different
C4_01360W_A	14.2912	14.3669	Not different
C2_07490W_A	14.3673	14.3651	Not different
C4_05690W_A	14.3247	14.3582	Not different
CR_10070C_A	14.2395	14.4425	Not different
C2_01640W_A	14.496	14.3744	Not different
C6_00820W_A	14.3708	14.4656	Not different
C2_10550C_A	14.4249	14.436	Not different
C1_06600W_A	14.308	14.3484	Not different
CR_05720W_A	14.2332	14.3966	Not different
C1_13940W_A	14.3674	14.3984	Not different
C4_05300W_A	14.2799	14.4597	Not different
C5_03550W_A	14.4527	14.4143	Not different
C3_01720C_A	14.2983	14.4137	Not different
CR_05380C_A	14.2773	14.3003	Not different
C5_03350W_A	14.2406	14.2222	Not different
C2_10860C_A	14.3257	14.2552	Not different
C5_04560C_A	14.1195	14.3336	Not different
C6_03960W_A	14.3137	14.3855	Not different
C2_02370C_A	14.2625	14.3394	Not different
C2_05180W_A	14.2508	14.4421	Not different
C6_04130C_A	14.519	14.4986	Not different
C1_06550W_A	14.2596	14.1995	Not different
C1_02790W_A	14.2492	14.202	Not different
C3_02780W_A	14.2323	14.2968	Not different
C2_01110C_A	14.2221	14.2462	Not different
CR_00580W_A	14.1874	14.1547	Not different
C5_00390C_A	14.2121	14.2338	Not different
C1_08430W_A	14.1698	14.2039	Not different
C1_13300C_A	14.2482	14.2866	Not different
C5_04270C_A	14.2858	14.2668	Not different
C6_02260C_A	14.1579	14.2576	Not different
CR_07010W_A	14.2974	14.2475	Not different
C1_07890C_A	14.2092	14.1079	Not different
CR_09790W_A	14.2091	14.1401	Not different
C2_03470C_A	14.1477	14.2342	Not different
C3_00240C_A	14.2417	14.1794	Not different
C4_00020W_A	14.2186	14.1031	Not different
CR_02920C_A	14.2346	14.1673	Not different
C4_00890W_A	14.2154	14.2937	Not different
C5_02170C_A	14.2672	14.2368	Not different
C5_05390C_A	14.3072	14.1787	Not different
C1_02810W_A	14.1408	14.2898	Not different
C1_11040W_A	14.0661	14.335	Not different
C7_01970C_A	14.2854	14.3655	Not different
C7_02890C_A	14.2545	14.4338	Not different
CR_10110W_A	14.3304	14.0903	Not different
C1_00110W_A	14.3016	14.158	Not different
C1_03520W_A	14.0802	14.2188	Not different
C1_04830W_A	14.1564	14.2497	Not different
C3_01550C_A	14.2451	14.3075	Not different
C4_01690C_A	14.0184	14.1443	Not different
C2_03280W_A	14.2499	14.2305	Not different
C6_03340C_A	14.1107	14.2174	Not different
C6_02730W_A	14.149	14.2202	Not different
C7_00520W_A	14.1338	14.2252	Not different
C3_05710W_A	14.2046	14.138	Not different
C3_07810C_A	14.1378	14.2316	Not different
C5_03140C_A	14.224	14.2238	Not different
C7_03360W_A	14.2909	14.2391	Not different
C1_13420C_A	14.0833	14.1009	Not different
CR_08890C_A	14.1232	14.1536	Not different
C1_01060W_A	14.0798	14.1926	Not different
C1_05940W_A	14.0697	14.2214	Not different
C2_01590W_A	14.0443	14.0745	Not different
C1_02710W_A	14.0738	14.1818	Not different
CR_09670C_A	14.0613	14.1804	Not different
C1_01690C_A	14.0658	14.0519	Not different
CR_04380C_A	14.0345	14.1133	Not different
CR_00320C_A	14.0604	14.1624	Not different
C3_07280C_A	14.1119	13.957	Not different
C7_01810W_A	14.0953	14.1481	Not different
CR_03770C_A	13.9203	14.0888	Not different
C2_08860W_A	13.9918	14.0712	Not different
C2_10670W_A	14.1245	14.0133	Not different
CR_06080W_A	14.0376	14.1076	Not different
C5_05490C_A	14.1653	14.0411	Not different
C3_01610W_A	13.9957	13.9977	Not different
C2_07630C_A	13.9503	13.9347	Not different
C4_05610C_A	14.1751	14.1526	Not different
CR_04000W_A	14.0391	14.1505	Not different
C1_02330C_A	13.8298	13.9444	Not different
C1_02590C_A	14.0354	13.9662	Not different
C1_12030W_A	13.9807	13.9293	Not different
C1_10400C_A	14.0634	14.0105	Not different
CR_08120C_A	14.1544	14.1371	Not different
C4_06870W_A	14.0083	14.042	Not different
CR_08950W_A	13.9783	14.091	Not different
C2_02340C_A	14.0809	14.0398	Not different
C2_05660W_A	14.0862	14.0919	Not different
C4_04800W_A	14.1039	14.1972	Not different
C3_04910C_A	14.1091	14.0124	Not different
C4_06030W_A	13.915	14.0278	Not different
C6_03370W_A	14.0502	13.9375	Not different
C2_03960W_A	13.8672	13.7726	Not different
C2_05500W_A	13.983	14.0324	Not different
C1_03130C_A	14.0243	14.0279	Not different
CR_00350W_A	14.0565	13.9278	Not different
C2_03060W_A	13.9995	14.0424	Not different
C6_01650C_A	13.784	13.8251	Not different
C3_00290W_A	14.0332	14.0793	Not different
C4_02870C_A	14.0259	13.931	Not different
C1_11850W_A	13.9096	13.8135	Not different
C4_05100C_A	14.0935	14.105	Not different
C1_05540C_A	13.8886	13.9255	Not different
C1_03100W_A	14.0539	14.1858	Not different
C1_01590C_A	14.0547	14.1826	Not different
C1_07230W_A	13.8728	14.1175	Not different
C1_01930W_A	13.9852	14.2108	Not different
C1_13830C_A	13.9584	13.8608	Not different
C7_02780W_A	14.0311	14.0717	Not different
C2_09640W_A	13.9423	14.0084	Not different
C2_07310W_A	14.0192	13.9781	Not different
C3_02320W_A	14.003	14.023	Not different
C4_01020C_A	13.8681	13.9459	Not different
C2_09950W_A	13.9152	13.9741	Not different
C3_00260C_A	13.946	14.0329	Not different
C5_03240W_A	13.8375	13.8021	Not different
C1_08950W_A	13.8556	13.9854	Not different
C1_08180C_A	13.9894	14.0297	Not different
C7_03810W_A	13.835	13.8928	Not different
C2_05720C_A	13.9295	13.8451	Not different
CR_02130W_A	13.8218	13.8923	Not different
C2_07290W_A	13.8282	13.8967	Not different
C7_01850C_A	13.8895	13.9068	Not different
C4_00590C_A	13.9868	13.9016	Not different
C1_10680C_A	14.058	14.1371	Not different
C2_02410W_A	13.8318	13.8584	Not different
C6_00910C_A	13.9088	13.9369	Not different
C1_14450C_A	14.0759	13.958	Not different
C4_06500W_A	13.859	14.0039	Not different
C2_08870C_A	13.8533	13.8442	Not different
C5_00480C_A	13.8634	13.9625	Not different
CR_08770W_A	13.9553	14.1417	Not different
C2_04580W_A	13.7691	13.8782	Not different
C2_07400C_A	13.9724	13.917	Not different
C4_02250C_A	13.8391	13.8619	Not different
C2_07550W_A	13.8713	13.8123	Not different
C1_01140C_A	13.969	14.0486	Not different
C2_00060C_A	13.9638	13.9288	Not different
C5_00200C_A	14.0226	14.045	Not different
C2_09710C_A	13.8458	13.9012	Not different
C4_03180W_A	13.8875	14.0637	Not different
CR_01400W_A	13.8845	13.9476	Not different
C4_06760W_A	13.8835	13.8276	Not different
C2_05690C_A	13.7313	13.8255	Not different
C2_02970C_A	13.8754	13.4768	Not different
C2_05250C_A	13.7872	13.755	Not different
C1_11590W_A	13.9866	13.9403	Not different
C1_10160W_A	13.8361	13.6441	Not different
C1_02620C_A	13.802	13.8872	Not different
C6_04250W_A	13.7687	13.8372	Not different
CR_03530W_A	13.8747	13.7552	Not different
C7_04210C_A	13.8505	13.8519	Not different
CR_01310W_A	13.7513	13.7232	Not different
C2_07900W_A	13.8294	13.7106	Not different
C1_14460W_A	13.8851	13.9503	Not different
CR_04060C_A	13.7505	13.9024	Not different
C5_02270W_A	13.8815	13.9962	Not different
C1_06940C_A	13.9114	13.9381	Not different
C6_04040C_A	13.8639	13.7904	Not different
C2_02380W_A	13.8452	13.8724	Not different
C2_09940W_A	13.7627	13.8417	Not different
C2_03240C_A	13.9173	13.8617	Not different
C7_00020C_A	13.8112	13.8449	Not different
C1_00930C_A	13.8291	13.8569	Not different
C1_08400C_A	13.935	13.622	Not different
C1_08030W_A	13.7242	13.6957	Not different
CR_08910C_A	13.7485	13.8979	Not different
C7_02570C_A	13.7286	13.9128	Not different
C4_01060W_A	13.8373	13.8381	Not different
C1_14210C_A	13.8466	13.8255	Not different
C3_06890W_A	13.8794	14.0334	Not different
C1_03750W_A	13.6629	13.8112	Not different
CR_00360C_A	13.7576	13.6919	Not different
C6_02040W_A	13.7563	13.7105	Not different
C1_03940W_A	13.6668	13.6966	Not different
CR_00470W_A	13.6998	13.8109	Not different
C1_08370W_A	13.9015	13.8038	Not different
C5_00650C_A	13.6813	13.7729	Not different
C2_01480W_A	13.8556	13.856	Not different
C1_00610W_A	13.7413	13.7456	Not different
CR_04960C_A	13.6094	13.7753	Not different
C2_07210C_A	13.8038	13.7687	Not different
C2_03080W_A	13.9055	13.5858	Not different
C1_14060W_A	13.8263	13.8898	Not different
C1_10100C_A	13.6484	13.6612	Not different
C2_05920C_A	13.7144	13.8672	Not different
C1_07340W_A	13.774	13.8681	Not different
CR_07490C_A	13.7131	13.829	Not different
C6_04650W_A	13.8941	13.9153	Not different
CR_00100C_A	13.9517	13.858	Not different
C1_05630C_A	13.8233	13.7917	Not different
C5_05380W_A	13.6879	13.5816	Not different
C6_00370C_A	13.8664	13.5616	Not different
C2_10280C_A	13.7135	13.7425	Not different
C4_04050C_A	13.6586	13.6414	Not different
CR_09010C_A	13.6657	13.9458	Not different
C7_03200C_A	13.6688	13.751	Not different
C2_02830C_A	13.7916	13.8478	Not different
C2_07010W_A	13.7286	13.7217	Not different
C2_00380C_A	13.7617	13.7642	Not different
C1_11220C_A	13.7388	13.7696	Not different
C3_02400C_A	13.5417	13.7442	Not different
C1_02760W_A	13.7208	13.8385	Not different
C3_06360C_A	13.7053	13.7466	Not different
C5_02110W_A	13.7174	13.8945	Not different
C6_03400C_A	13.6307	13.599	Not different
CR_07830C_A	13.6808	13.7889	Not different
C1_11030W_A	13.7057	13.565	Not different
C3_01630W_A	13.7546	13.7498	Not different
CR_10670W_A	13.6902	13.8726	Not different
C6_03940C_A	13.7231	13.7723	Not different
C7_01450C_A	13.6726	13.8274	Not different
C5_00800C_A	13.7185	13.8247	Not different
C1_08880W_A	13.5289	13.7923	Not different
C3_00200C_A	13.7247	13.7826	Not different
C4_06130W_A	13.645	13.6711	Not different
CR_05920C_A	13.692	13.6207	Not different
C4_02980W_A	13.7185	13.7167	Not different
C2_06210C_A	13.6935	13.6875	Not different
C2_10350C_A	13.6889	13.7109	Not different
C2_08780W_A	13.6879	13.773	Not different
C2_10050W_A	13.6216	13.7181	Not different
C5_02080C_A	13.6153	13.7782	Not different
C6_03410C_A	13.4966	13.6914	Not different
C2_03520C_A	13.8433	13.6934	Not different
C1_03450C_A	13.6418	13.7313	Not different
C4_02620C_A	13.814	13.6907	Not different
C2_02770W_A	13.7447	13.751	Not different
C6_01720C_A	13.8188	13.5934	Not different
C1_07540C_A	13.8181	13.7527	Not different
C2_00260C_A	13.6457	13.6783	Not different
C2_06190W_A	13.6827	13.8536	Not different
C1_08540C_A	13.6884	13.7248	Not different
C1_03500W_A	13.6014	13.6566	Not different
C2_04620W_A	13.6312	13.658	Not different
C6_04560W_A	13.6824	13.657	Not different
CR_06760C_A	13.7164	13.6031	Not different
C3_06910C_A	13.6627	13.7195	Not different
C2_06940C_A	13.5268	13.7519	Not different
CR_04740C_A	13.7426	13.5461	Not different
C1_05960W_A	13.5876	13.8518	Not different
C2_01620W_A	13.5738	13.6157	Not different
C4_00420C_A	13.7591	13.8011	Not different
C4_04770C_A	13.6155	13.3324	Not different
C5_00270W_A	13.6614	13.7126	Not different
C4_03360C_A	13.5348	13.6415	Not different
C2_00580C_A	13.6215	13.7848	Not different
C3_06850W_A	13.7133	13.5784	Not different
C2_10290W_A	13.7244	13.7612	Not different
C1_01870C_A	13.6711	13.6722	Not different
C5_02300C_A	13.5769	13.6597	Not different
C2_07420W_A	13.5668	13.6884	Not different
C1_10620W_A	13.6273	13.579	Not different
C6_00130C_A	13.7933	13.8207	Not different
C1_00710C_A	13.5697	13.7125	Not different
C6_01900C_A	13.5825	13.7171	Not different
C7_03860W_A	13.5994	13.7702	Not different
C3_02170C_A	13.6198	13.6651	Not different
CR_00560W_A	13.6218	13.7826	Not different
C5_05200C_A	13.4902	13.6633	Not different
C1_02970W_A	13.5669	13.718	Not different
C7_04260W_A	13.7057	13.6986	Not different
C1_03210C_A	13.5712	13.6947	Not different
C2_07320W_A	13.6175	13.6845	Not different
C6_00300C_A	13.6979	13.7836	Not different
C1_11540C_A	13.8138	13.7743	Not different
C2_06420C_A	13.6511	13.802	Not different
C1_05660C_A	13.6283	13.711	Not different
C6_04100W_A	13.6348	13.6048	Not different
C7_04240C_A	13.6521	13.6283	Not different
C1_00420W_A	13.5056	13.6359	Not different
C1_06850W_A	13.6222	13.5393	Not different
CR_03610C_A	13.602	13.5687	Not different
CR_09120C_A	13.6414	13.7371	Not different
CR_10490W_A	13.5313	13.6272	Not different
C7_00860W_A	13.6382	13.7706	Not different
C1_08550C_A	13.4753	13.6137	Not different
C2_03760C_A	13.5756	13.5203	Not different
C3_07490W_A	13.5725	13.626	Not different
C2_06390C_A	13.661	13.5475	Not different
C1_06780W_A	13.6347	13.6289	Not different
C6_01110W_A	13.5267	13.6857	Not different
CR_09530C_A	13.6789	13.8726	Not different
C5_04700C_A	13.5116	13.6246	Not different
C3_05310W_A	13.5559	13.6985	Not different
C1_11270W_A	13.5857	13.5247	Not different
C4_00200C_A	13.659	13.6103	Not different
C4_01490W_A	13.4878	13.4668	Not different
C1_03490W_A	13.489	13.531	Not different
C6_04270W_A	13.5802	13.5938	Not different
C2_07130C_A	13.6853	13.5949	Not different
C1_09660W_A	13.5583	13.6975	Not different
CR_07650W_A	13.6569	13.4933	Not different
CR_01110W_A	13.557	13.5414	Not different
C2_01410C_A	13.6619	13.6369	Not different
C2_04140W_A	13.5956	13.6031	Not different
C4_04780W_A	13.6298	13.622	Not different
C7_03330C_A	13.5904	13.5958	Not different
C4_00040W_A	13.7019	13.5908	Not different
C1_12620W_A	13.586	13.6293	Not different
C1_09850C_A	13.4871	13.5885	Not different
CR_08570W_A	13.6233	13.6861	Not different
C5_02890W_A	13.4855	13.3987	Not different
C3_02280C_A	13.5162	13.7131	Not different
CR_09950C_A	13.5245	13.4482	Not different
C7_04020C_A	13.5722	13.6508	Not different
C5_01870W_A	13.5477	13.5429	Not different
C5_01960C_A	13.5887	13.5562	Not different
CR_05180C_A	13.4757	13.5035	Not different
C2_00340C_A	13.5746	13.6549	Not different
C5_01770C_A	13.537	13.5465	Not different
C5_04730C_A	13.645	13.7571	Not different
C2_08240W_A	13.509	13.5871	Not different
C1_11080W_A	13.3748	13.5146	Not different
C1_00500C_A	13.4521	13.5107	Not different
C1_05000W_A	13.4378	13.1442	Not different
C5_02930C_A	13.387	13.5801	Not different
C7_02100W_A	13.5057	13.4975	Not different
C5_01540W_A	13.44	13.4753	Not different
C6_03720W_A	13.5251	13.6155	Not different
C5_01820W_A	13.5204	13.532	Not different
C1_14240W_A	13.457	13.4896	Not different
C1_01530C_A	13.4941	13.5225	Not different
C1_10490W_A	13.5032	13.4234	Not different
C3_04970C_A	13.4192	13.5589	Not different
C3_01860C_A	13.4542	13.4345	Not different
C2_00360C_A	13.5196	13.6154	Not different
C5_02230W_A	13.4378	13.493	Not different
C1_12410C_A	13.4392	13.4209	Not different
C1_00140W_A	13.6343	13.5221	Not different
C1_00740C_A	13.4244	13.5163	Not different
C2_00100C_A	13.4749	13.6458	Not different
C4_01760W_A	13.3359	13.5302	Not different
C5_01690C_A	13.3647	13.4338	Not different
C1_08610C_A	13.4554	13.428	Not different
C3_04470W_A	13.5252	13.6516	Not different
C6_01320W_A	13.3428	13.3995	Not different
C1_05670W_A	13.4079	13.445	Not different
CR_03520C_A	13.5049	13.5886	Not different
C4_03940C_A	13.3965	13.5725	Not different
C3_03870C_A	13.5175	13.4699	Not different
C6_00280W_A	13.5406	13.4691	Not different
C4_05590W_A	13.3216	13.4586	Not different
C1_04590W_A	13.2632	13.3236	Not different
C1_03360W_A	13.495	13.5044	Not different
C1_14260C_A	13.4349	13.4423	Not different
C2_03360W_A	13.5044	13.4883	Not different
C1_08410C_A	13.3945	13.5866	Not different
CR_10370W_A	13.4103	13.375	Not different
C1_01650W_A	13.3399	13.43	Not different
C2_04850C_A	13.4837	13.4835	Not different
C2_10710W_A	13.4069	13.4548	Not different
C5_01210W_A	13.4714	13.5434	Not different
C5_01320W_A	13.5069	13.4356	Not different
C2_07100W_A	13.3703	13.461	Not different
CR_08030C_A	13.472	13.5291	Not different
C6_01630W_A	13.4893	13.4577	Not different
C4_01720C_A	13.6653	13.7093	Not different
C1_14520W_A	13.541	13.602	Not different
C6_02340W_A	13.5029	13.2918	Not different
C3_05590C_A	13.3308	13.4778	Not different
CR_01290C_A	13.4751	13.6523	Not different
C2_01850W_A	13.4027	13.3975	Not different
C6_04280W_A	13.2954	13.5003	Not different
CR_00260W_A	13.6505	13.6326	Not different
C2_07740W_A	13.5722	13.5448	Not different
C4_01980C_A	13.3559	13.3552	Not different
C5_04600C_A	13.425	13.512	Not different
C5_01080C_A	13.481	13.4265	Not different
C5_00080C_A	13.398	13.3952	Not different
C4_06830C_A	13.4289	13.4516	Not different
C2_08610W_A	13.3205	13.4551	Not different
C1_03680W_A	13.4747	13.4083	Not different
C1_01490W_A	13.4044	13.2647	Not different
C3_04080W_A	13.3265	13.329	Not different
C6_04570W_A	13.5111	13.4791	Not different
C4_00150C_A	13.4373	13.3346	Not different
C5_02840C_A	13.4019	13.4677	Not different
C2_07330W_A	13.3987	13.3959	Not different
C4_06120W_A	13.3796	13.0596	Not different
C4_02780W_A	13.3728	13.2866	Not different
C2_09230C_A	13.4381	13.4492	Not different
C4_05390W_A	13.2921	13.2758	Not different
CR_06490C_A	13.5053	13.5632	Not different
C1_08060W_A	13.3168	13.512	Not different
C2_10210C_A	13.3915	13.2794	Not different
C2_01010W_A	13.4389	13.4251	Not different
C1_10280C_A	13.3537	13.5938	Not different
C1_11330C_A	13.2915	13.461	Not different
CR_09340W_A	13.3331	13.4121	Not different
C1_08700W_A	13.3977	13.4622	Not different
C2_05640W_A	13.4674	13.5388	Not different
CR_01590C_A	13.296	13.3299	Not different
C1_10660W_A	13.2784	13.3273	Not different
C4_00140C_A	13.4695	13.5266	Not different
C2_06020W_A	13.289	13.4269	Not different
C6_02060W_A	13.3044	13.2805	Not different
C5_02030W_A	13.316	13.376	Not different
C2_05790C_A	13.3699	13.4198	Not different
CR_08480C_A	13.204	13.3847	Not different
C1_02480W_A	13.1647	13.3589	Not different
C2_04500W_A	13.2782	13.4309	Not different
CR_00980C_A	13.448	13.41	Not different
C3_03170W_A	13.3308	13.4111	Not different
C4_06060W_A	13.3663	13.5385	Not different
C2_07590W_A	13.2494	13.326	Not different
C4_01840C_A	13.2502	13.2462	Not different
CR_10340W_A	13.4737	13.321	Not different
C4_06810C_A	13.2789	13.3182	Not different
C2_10660W_A	13.4449	13.3944	Not different
C7_00830C_A	13.6223	13.4993	Not different
C3_04110C_A	13.2986	13.3709	Not different
C7_00070C_A	13.3378	13.3192	Not different
C4_05240C_A	13.3174	13.3338	Not different
CR_08340W_A	13.4092	13.1968	Not different
C6_01420C_A	13.2514	13.4178	Not different
C5_04110W_A	13.4818	13.2856	Not different
C4_05450C_A	13.2464	13.3907	Not different
C1_03550C_A	13.3593	13.37	Not different
C3_06280W_A	13.3136	13.4509	Not different
C4_00170W_A	13.2447	13.2989	Not different
C1_11350C_A	13.2057	13.2741	Not different
C6_04080W_A	13.2445	13.3955	Not different
C6_02560W_A	13.2697	13.3685	Not different
C2_09040W_A	13.1924	13.0837	Not different
C6_02930W_A	13.2551	13.2804	Not different
C3_04880W_A	13.3329	13.3896	Not different
CR_05300C_A	13.222	13.3343	Not different
C2_02590W_A	13.271	13.2929	Not different
C7_01900W_A	13.3706	13.3047	Not different
C3_04820C_A	13.2747	13.3536	Not different
C6_02500C_A	13.1385	13.1327	Not different
C2_08120W_A	13.3018	13.2446	Not different
C3_02150C_A	13.1764	13.3007	Not different
C1_08420W_A	13.2813	13.3677	Not different
C1_08560W_A	13.2714	13.3213	Not different
C1_07690C_A	13.1922	13.3298	Not different
C4_01370W_A	13.2784	13.3272	Not different
C3_07780C_A	13.4122	13.2831	Not different
C1_11870W_A	13.2359	13.3822	Not different
C5_00790C_A	13.3939	13.3647	Not different
C1_05530C_A	13.2434	13.3162	Not different
C2_07060W_A	13.1978	13.3185	Not different
C3_02680C_A	13.1575	13.2916	Not different
C2_03220C_A	13.3427	12.9549	Not different
C2_10240W_A	13.1479	13.3925	Not different
C2_09520C_A	13.2557	13.2775	Not different
C1_02750C_A	13.3083	13.3794	Not different
C2_03900C_A	13.2924	13.2422	Not different
C2_09650W_A	13.3	13.3306	Not different
C3_07260C_A	13.2841	13.475	Not different
CR_10580W_A	13.2245	13.3753	Not different
C4_02060C_A	13.2775	13.2877	Not different
C2_02720W_A	13.2942	13.2944	Not different
C7_03180C_A	13.1932	13.123	Not different
C1_09650W_A	13.1935	13.2358	Not different
C1_03390W_A	13.2334	13.1757	Not different
C5_02710W_A	13.2601	13.2467	Not different
C1_09030C_A	13.1848	13.3625	Not different
CR_07480W_A	13.2532	13.2441	Not different
C1_05560W_A	13.1994	13.3103	Not different
C4_02970C_A	13.247	13.3152	Not different
C1_08110W_A	13.3716	13.3522	Not different
C1_08780W_A	13.1823	13.2224	Not different
C1_00440W_A	13.1934	13.325	Not different
C3_05650W_A	13.2417	13.2229	Not different
C1_07410C_A	13.0937	13.2287	Not different
C6_02330W_A	13.2434	13.0159	Not different
C4_04390W_A	13.1792	13.163	Not different
C2_01550W_A	13.2963	13.2768	Not different
C4_06720W_A	13.3273	13.0854	Not different
C2_09270C_A	13.1642	13.2222	Not different
C1_01700W_A	13.1813	13.2238	Not different
C3_00770C_A	13.0542	13.2597	Not different
CR_05980W_A	13.1647	13.3182	Not different
C1_11730W_A	13.3065	13.4275	Not different
C2_04050C_A	13.2122	13.4318	Not different
C1_12380C_A	13.1848	13.1959	Not different
C1_03120W_A	13.1272	13.0667	Not different
C2_08500W_A	13.2192	13.2738	Not different
C3_01890C_A	13.2568	13.2479	Not different
C3_03910W_A	13.1456	13.1926	Not different
C2_01530C_A	13.2521	13.2888	Not different
C5_05500C_A	13.2299	13.2508	Not different
C2_02100W_A	13.2015	13.2346	Not different
CR_02870W_A	13.1532	13.2763	Not different
C6_01760W_A	13.2359	13.221	Not different
CR_10300W_A	13.2051	13.3192	Not different
CR_08710W_A	13.2795	13.214	Not different
C3_03040W_A	13.2799	13.145	Not different
CR_07090W_A	13.1607	13.3264	Not different
C7_03070C_A	13.1757	13.1945	Not different
CR_05440W_A	13.1817	13.1661	Not different
C2_09020W_A	13.2478	13.2708	Not different
CR_02090C_A	13.2201	13.2122	Not different
C2_08000C_A	13.2513	13.1633	Not different
CR_04570C_A	13.1163	13.2023	Not different
C7_04130C_A	13.1527	13.1619	Not different
C7_00750W_A	13.0346	13.3414	Not different
C1_13350W_A	13.2187	13.1133	Not different
C3_00250C_A	13.3181	13.2805	Not different
C7_00190W_A	13.2174	13.1766	Not different
CR_06180W_A	13.1186	13.1571	Not different
C6_00170C_A	13.3337	13.2099	Not different
C4_05810W_A	13.2001	13.1657	Not different
C7_00390W_A	13.195	13.137	Not different
CR_01610C_A	13.1059	13.152	Not different
CR_00520C_A	13.1914	13.2909	Not different
C1_10940C_A	13.1072	13.1057	Not different
C7_02640W_A	13.2551	13.3696	Not different
C4_01770W_A	13.0714	13.3167	Not different
C5_02790C_A	13.0955	13.4158	Not different
C4_04330C_A	13.1724	13.0981	Not different
C7_02910W_A	13.2371	13.1713	Not different
C2_05890C_A	13.1888	13.1722	Not different
C5_04800W_A	13.0965	13.3414	Not different
C1_06810W_A	13.3247	13.0395	Not different
C1_02050C_A	13.1881	13.232	Not different
C1_03780C_A	13.1701	13.2938	Not different
C6_00100C_A	13.0791	13.1125	Not different
CR_07710W_A	13.121	13.2129	Not different
C5_00040C_A	13.1794	13.1883	Not different
C1_01320W_A	13.1712	13.1487	Not different
CR_06750C_A	13.0501	13.0971	Not different
C5_01090C_A	13.0997	13.1466	Not different
CR_09140C_A	13.1754	13.1316	Not different
C1_01790W_A	13.1491	13.1428	Not different
C1_06660W_A	13.1434	13.1407	Not different
C1_12970C_A	13.0321	13.1659	Not different
C1_04210C_A	13.0997	13.2812	Not different
C1_00950C_A	13.1952	13.3161	Not different
C2_03330C_A	13.1193	13.1215	Not different
C3_01990W_A	13.1042	13.1573	Not different
CR_07450C_A	13.2326	13.2161	Not different
C3_00800W_A	13.2734	13.2849	Not different
CR_08560C_A	13.0457	13.0916	Not different
C4_00260W_A	13.1518	13.1387	Not different
C2_08010W_A	13.0785	13.2537	Not different
C2_05930W_A	12.9976	13.0423	Not different
C5_00180W_A	13.2957	13.1514	Not different
C2_09750W_A	13.1298	13.2091	Not different
C1_12490W_A	13.1011	13.308	Not different
C1_12960C_A	13.0955	13.1967	Not different
C4_06580W_A	12.9948	13.0003	Not different
C5_05450C_A	13.0879	13.1176	Not different
C4_00400W_A	13.2098	13.192	Not different
C4_00570C_A	13.0149	13.095	Not different
C5_04640C_A	13.0821	13.1639	Not different
C7_00730W_A	13.0634	12.9015	Not different
C1_00160C_A	13.1535	13.0197	Not different
C2_01690W_A	13.0166	13.1398	Not different
CR_09380W_A	13.0488	13.2224	Not different
CR_02610C_A	13.0869	13.0793	Not different
C5_00150C_A	13.277	13.1352	Not different
CR_03990C_A	13.0965	13.0245	Not different
C1_11480W_A	13.0705	12.892	Not different
C7_00150W_A	13.0739	13.0649	Not different
C1_10090C_A	13.1599	13.2313	Not different
C3_04860W_A	13.3249	13.1715	Not different
C1_11990W_A	13.0672	12.9994	Not different
C5_04920C_A	13.0103	13.1688	Not different
C1_13580W_A	13.0582	13.2077	Not different
C2_00140W_A	13.3618	13.3838	Not different
C2_08390W_A	12.9682	13.0025	Not different
CR_04340W_A	13.1914	13.2396	Not different
CR_10140W_A	13.0374	13.0381	Not different
C1_14340C_A	13.3804	13.2294	Not different
C6_00440C_A	13.2928	13.1027	Not different
C6_04480C_A	13.0069	13.1959	Not different
C3_04590W_A	12.9791	13.0504	Not different
C3_05880C_A	13.1179	13.2002	Not different
C1_00750C_A	13.1547	13.2315	Not different
C7_03010W_A	13.06	13.0885	Not different
C3_02610C_A	13.0666	13.2585	Not different
C1_00040W_A	12.8589	12.9302	Not different
C1_04420C_A	12.9652	13.0962	Not different
C1_09490C_A	13.182	12.916	Not different
C2_00830C_A	13.1108	13.1217	Not different
C1_04450C_A	12.9575	13.1294	Not different
C7_00030W_A	13.1313	13.0663	Not different
C3_00110C_A	13.1565	13.1684	Not different
CR_04300W_A	13.0672	13.0891	Not different
CR_07420W_A	13.1294	12.9584	Not different
C2_01270W_A	12.9989	13.2787	Not different
C1_04480C_A	13.0652	13.0814	Not different
C1_03560C_A	13.0629	13.0478	Not different
CR_03810W_A	13.151	13.1924	Not different
C2_06150C_A	13.0127	13.1536	Not different
C1_07710C_A	13.006	12.824	Not different
CR_04080C_A	13.0979	13.1673	Not different
C2_08930W_A	12.8871	13.1178	Not different
C5_02470W_A	13.0221	13.1032	Not different
C1_04970W_A	13.0907	13.1245	Not different
CR_07230W_A	13.0247	13.0051	Not different
CR_07440W_A	13.22	13.1974	Not different
C3_07560W_A	13.4127	13.194	Not different
C3_02180C_A	12.9194	13.0305	Not different
CR_04140W_A	13.0344	13.0937	Not different
C5_02000C_A	13.0965	13.05	Not different
CR_08430W_A	13.0812	13.0941	Not different
C2_00760C_A	12.9696	12.9929	Not different
CR_03280W_A	12.9753	13.0764	Not different
C1_11170W_A	12.9665	12.943	Not different
C2_00400C_A	12.9096	12.8145	Not different
C3_05930W_A	12.9577	13.0375	Not different
C3_02490C_A	12.9743	13.1146	Not different
C7_01780W_A	13.0445	12.9882	Not different
C2_00120C_A	13.0639	13.1538	Not different
CR_04720C_A	12.9102	13.0399	Not different
C1_13810W_A	13.0621	13.1333	Not different
C2_08130W_A	12.9412	12.9869	Not different
C7_00740W_A	13.0099	13.0746	Not different
C2_05100C_A	12.968	12.9637	Not different
C3_05970C_A	13.1782	13.0626	Not different
C3_04390W_A	12.8804	12.94	Not different
CR_02170W_A	13.0512	12.8249	Not different
C1_04520C_A	12.9825	12.9396	Not different
C2_09460C_A	13.0521	13.05	Not different
C1_12320C_A	12.8747	12.8512	Not different
C4_02890C_A	12.9312	13.0661	Not different
C1_05170C_A	13.0212	12.9559	Not different
C5_05120W_A	13.0423	13.0973	Not different
C1_00480C_A	13.1263	13.0877	Not different
C4_03110W_A	12.9217	12.7916	Not different
C3_05450C_A	12.9154	13.0563	Not different
C4_06270C_A	12.8479	12.9697	Not different
C2_10590W_A	13.0826	12.9439	Not different
C2_08160C_A	12.9066	12.9366	Not different
C1_06960W_A	12.9347	12.9362	Not different
C2_07730W_A	13.0993	13.152	Not different
C3_03280C_A	12.9078	13.1051	Not different
C7_03890C_A	13.0275	12.9939	Not different
CR_09980W_A	12.9772	13.0149	Not different
C1_02980W_A	12.964	13.1316	Not different
C1_10890C_A	12.893	12.9447	Not different
C2_07600C_A	13.0386	13.008	Not different
C4_05150W_A	12.8879	13.0009	Not different
C1_08600C_A	13.0304	12.9677	Not different
C6_02470W_A	12.7948	12.9454	Not different
C1_03310W_A	12.9339	12.7984	Not different
CR_09690C_A	13.0026	13.0054	Not different
C7_01940C_A	13.016	13.0647	Not different
C1_01560W_A	13.2018	13.1997	Not different
C6_03130W_A	12.9233	12.7767	Not different
C7_01550W_A	12.9016	12.9073	Not different
C6_03160C_A	12.9318	12.9618	Not different
C2_03140C_A	12.8877	12.9152	Not different
C2_02460W_A	12.9929	13.0698	Not different
C1_07180W_A	12.9453	12.9193	Not different
C4_03600C_A	12.8335	12.8373	Not different
C2_07390C_A	13.0392	12.9982	Not different
CR_02040W_A	12.9816	13.0839	Not different
C2_01600C_A	12.9148	12.9165	Not different
C7_03720C_A	12.9284	13.0285	Not different
CR_00490W_A	12.9455	13.0837	Not different
C3_07420W_A	12.9148	12.9413	Not different
C3_02160C_A	13.1677	13.1281	Not different
C3_07730W_A	13.0173	12.8854	Not different
CR_04180C_A	13.0056	12.9828	Not different
C1_11770C_A	13.1442	13.1078	Not different
CR_08000C_A	13.0621	13.0504	Not different
C2_04220C_A	12.8792	13.0441	Not different
CR_04550W_A	12.8857	12.9578	Not different
C2_02030W_A	12.8776	12.8439	Not different
C4_00070C_A	13.0484	12.9635	Not different
CR_00060C_A	13.0612	12.9681	Not different
C4_06340W_A	12.7759	13.1104	Not different
C2_01990C_A	12.7391	12.9139	Not different
C2_01430W_A	12.8637	12.919	Not different
C3_05520C_A	12.9711	13.0329	Not different
C3_00450C_A	12.9921	12.8728	Not different
C3_00710W_A	12.9652	13.1076	Not different
CR_01240C_A	13.0664	13.0391	Not different
C4_00280W_A	12.911	13.0269	Not different
C6_02600W_A	13.004	13.0177	Not different
C2_06170C_A	13.0605	12.8872	Not different
CR_01820W_A	12.8794	12.9925	Not different
C1_13190W_A	12.7969	13.0054	Not different
C3_06860C_A	12.7598	12.7925	Not different
C1_08270C_A	13.0759	13.0506	Not different
C2_06290C_A	12.8027	12.7024	Not different
C4_02320C_A	12.8438	12.9954	Not different
C5_04050W_A	12.8879	12.8898	Not different
C1_09610W_A	12.7854	12.784	Not different
C2_02760W_A	12.9281	12.9317	Not different
C2_07140W_A	12.6977	12.8507	Not different
C1_12230W_A	12.9398	12.9576	Not different
C1_11550W_A	12.8976	12.821	Not different
C4_06680C_A	13.072	12.9165	Not different
C4_01250W_A	12.7913	13.0692	Not different
C2_07610C_A	12.877	12.9432	Not different
C6_03460W_A	13.0648	12.9578	Not different
C1_11450C_A	12.9563	12.8808	Not different
CR_02510W_A	12.958	12.6663	Not different
C2_06820C_A	12.8643	12.977	Not different
C3_03260W_A	12.9208	12.9544	Not different
CR_00250W_A	12.8471	12.869	Not different
C1_13920W_A	12.7978	12.8305	Not different
C2_00740C_A	12.8606	12.8907	Not different
CR_04200W_A	12.9386	12.9345	Not different
C5_00750C_A	12.8898	12.9739	Not different
C1_11120C_A	12.8085	12.7892	Not different
C4_07190W_A	12.9279	12.9268	Not different
C2_07220W_A	12.8102	12.9824	Not different
C1_08010W_A	12.8164	12.936	Not different
C2_06540C_A	12.9507	13.0626	Not different
CR_07050C_A	13.1051	12.9785	Not different
C4_00450C_A	12.8049	12.9362	Not different
CR_02000C_A	12.9425	12.9921	Not different
C4_04530C_A	13.0304	12.939	Not different
C1_02920W_A	12.8341	12.8667	Not different
C2_09980W_A	12.8306	12.6282	Not different
CR_07890W_A	13.0634	12.9519	Not different
C2_07640W_A	12.824	12.6923	Not different
C3_05150W_A	12.9715	12.9259	Not different
C2_07650C_A	12.7671	12.8872	Not different
C2_01220W_A	12.7809	12.8476	Not different
C5_02660C_A	12.8217	12.8589	Not different
C7_00550C_A	12.8922	12.9935	Not different
C1_14190C_A	12.7932	12.7051	Not different
C2_00570W_A	12.9472	12.8442	Not different
C3_04300C_A	12.8964	12.9561	Not different
C1_02780W_A	12.8034	13.0102	Not different
C2_05650W_A	12.8651	12.898	Not different
C2_01390W_A	12.9288	12.8896	Not different
C4_05540W_A	12.8192	12.8905	Not different
C5_02210W_A	12.7605	12.7951	Not different
CR_08020C_A	12.8132	12.8289	Not different
C7_02860C_A	12.892	12.942	Not different
C5_03500W_A	12.8523	13.0303	Not different
C5_01520C_A	12.817	12.8859	Not different
CR_00230W_A	12.8678	12.8794	Not different
C6_00350W_A	13.0171	12.9664	Not different
C1_03860C_A	12.8639	12.9589	Not different
CR_06810W_A	12.726	12.8076	Not different
C7_01230C_A	12.7362	12.9328	Not different
CR_01970C_A	12.7713	12.8971	Not different
C2_04030C_A	12.8291	12.8092	Not different
C1_09830W_A	12.8102	12.9521	Not different
CR_05080W_A	12.7902	12.7297	Not different
C3_03360W_A	12.793	12.8448	Not different
C4_03290W_A	12.7664	12.8685	Not different
C4_04580W_A	12.9991	13.061	Not different
C3_05210C_A	12.7943	12.9332	Not different
C2_08800C_A	12.8488	12.8779	Not different
CR_08650C_A	12.8837	12.949	Not different
C1_03620C_A	12.6624	12.5913	Not different
C1_02420C_A	12.9665	13.1695	Not different
C3_01910C_A	12.8213	12.9019	Not different
C1_07840W_A	12.6928	12.8859	Not different
C2_10750C_A	12.8896	12.9783	Not different
C4_01710C_A	13.0585	12.6814	Not different
C7_04280C_A	12.8168	12.8226	Not different
C5_00070W_A	12.7986	12.7011	Not different
C1_12450C_A	12.7344	12.7565	Not different
C3_06070C_A	12.7991	12.9102	Not different
C2_04550C_A	12.8209	12.7883	Not different
C3_01530C_A	12.6602	12.6663	Not different
C1_06590C_A	12.7876	12.7124	Not different
C2_03410W_A	12.8187	12.797	Not different
CR_01500W_A	12.988	12.9379	Not different
CR_08290W_A	12.845	12.7956	Not different
CR_04050C_A	12.8316	12.7106	Not different
C2_10010C_A	12.6914	12.7497	Not different
C4_02470C_A	12.6507	12.8164	Not different
C4_05430C_A	12.748	12.789	Not different
C1_04230W_A	12.6882	12.903	Not different
CR_01170W_A	12.6816	12.851	Not different
C5_00030W_A	12.9459	12.7685	Not different
C2_05530C_A	12.7995	12.7148	Not different
C2_07560W_A	12.8665	12.8141	Not different
C1_03480C_A	12.6624	12.8026	Not different
CR_05240C_A	12.7571	12.9343	Not different
C4_03390W_A	12.7002	12.444	Not different
C5_00210C_A	12.8628	12.8947	Not different
CR_04530W_A	12.7278	12.7819	Not different
C2_07930C_A	13.0278	12.9651	Not different
C6_02280W_A	12.7669	12.7001	Not different
C1_00080C_A	12.7774	12.6691	Not different
C2_01670C_A	12.7489	12.8453	Not different
CR_09650W_A	13.0481	12.9128	Not different
C1_10380C_A	12.8232	12.8559	Not different
C6_03750C_A	12.6923	12.677	Not different
C5_03960W_A	12.7389	12.6781	Not different
C1_09460W_A	12.7131	12.6314	Not different
C1_08490W_A	12.7348	12.8222	Not different
C1_01520C_A	12.6872	12.6565	Not different
C4_06600W_A	12.6868	12.7539	Not different
C2_01200C_A	12.9363	12.8625	Not different
CR_00510C_A	12.6424	12.6521	Not different
CR_07190W_A	12.7303	12.6601	Not different
C1_04960C_A	12.5328	12.8272	Not different
C1_01890C_A	12.7965	12.7104	Not different
C5_04290C_A	12.6988	12.7358	Not different
C2_02020W_A	12.7069	12.8752	Not different
C4_05030C_A	12.7737	12.8672	Not different
CR_06700C_A	12.6683	12.7116	Not different
C1_03730C_A	12.7377	12.877	Not different
C2_09320C_A	12.8369	12.4848	Not different
CR_02930W_A	12.6624	12.664	Not different
CR_04360C_A	12.6912	12.5165	Not different
CR_10800C_A	12.9703	12.7729	Not different
CR_02150W_A	12.7023	12.6562	Not different
C6_00150W_A	12.9443	12.3654	Not different
C1_11310C_A	12.7222	12.7233	Not different
C5_00220W_A	12.7627	12.7989	Not different
C1_10010C_A	12.7613	12.8266	Not different
C6_02980C_A	12.7027	12.8117	Not different
C6_03900W_A	12.711	12.6918	Not different
C7_03240W_A	12.6199	12.7317	Not different
C2_02990C_A	12.7554	12.8881	Not different
C1_08940C_A	12.8498	12.8378	Not different
C7_03270W_A	13.0073	12.7568	Not different
C3_03520C_A	12.6886	12.689	Not different
C2_00490W_A	12.7133	12.7041	Not different
CR_02860W_A	12.7078	12.7798	Not different
C2_05470W_A	12.7128	12.7368	Not different
C7_02770W_A	12.7285	12.8705	Not different
CR_08060C_A	12.7487	12.7881	Not different
C6_02610C_A	12.5841	12.6272	Not different
C1_08050W_A	12.601	12.5859	Not different
C4_05900C_A	12.8138	12.7911	Not different
C2_10850C_A	12.8121	12.724	Not different
C2_10460C_A	12.6784	12.7322	Not different
C3_04520C_A	12.7791	12.4976	Not different
C4_06400C_A	12.5746	12.6198	Not different
C1_02210W_A	12.7328	12.5386	Not different
C3_02920W_A	12.6179	12.5769	Not different
C7_02850W_A	12.6081	12.7139	Not different
C6_00410C_A	12.7471	12.8138	Not different
CR_01520W_A	12.7265	12.801	Not different
C6_04500C_A	12.7516	12.7568	Not different
C7_03370C_A	12.5663	12.6727	Not different
C1_03350C_A	12.8604	12.7041	Not different
C3_07060W_A	12.6196	12.6443	Not different
C3_01670W_A	12.6898	12.7143	Not different
C6_03710W_A	12.7699	12.7885	Not different
C2_02980C_A	12.7865	12.721	Not different
CR_05210W_A	12.6407	12.5088	Not different
C1_06520C_A	12.5528	12.665	Not different
C1_01250W_A	12.7359	12.8106	Not different
C3_06820C_A	12.7948	12.7346	Not different
C1_02820W_A	12.7359	12.7412	Not different
C4_01950W_A	12.6052	12.5703	Not different
C6_02220W_A	12.5229	12.7071	Not different
C1_04770C_A	12.6655	12.9008	Not different
C5_04090C_A	12.6262	12.6131	Not different
CR_01750C_A	12.697	12.8136	Not different
C7_01470C_A	12.552	12.7356	Not different
C3_00670C_A	12.7778	12.6724	Not different
C6_03380W_A	12.6984	12.6432	Not different
C4_06650W_A	12.6221	12.6269	Not different
C1_14360C_A	12.8283	12.8828	Not different
C1_10360C_A	12.8104	12.7885	Not different
C2_08490W_A	12.6407	12.638	Not different
C6_04290W_A	12.9	12.8997	Not different
CR_02390W_A	12.7011	12.692	Not different
CR_04450C_A	12.7323	12.6862	Not different
C1_13030C_A	12.6633	12.7054	Not different
CR_08660W_A	12.6907	12.6261	Not different
C3_00820W_A	12.6666	12.6778	Not different
C3_05190C_A	12.6732	12.7319	Not different
C4_03020W_A	12.7228	12.7881	Not different
C1_03690W_A	12.6192	12.6973	Not different
C1_08800W_A	12.5252	12.5728	Not different
C3_03670W_A	12.4684	12.6264	Not different
C5_05400W_A	12.6854	12.6187	Not different
C1_13260W_A	12.5784	12.8969	Not different
C1_14300C_A	12.7769	12.7235	Not different
C3_00480C_A	12.5831	12.6819	Not different
C5_01290C_A	12.601	12.6732	Not different
C4_02360W_A	12.5069	12.7826	Not different
CR_06470W_A	12.6201	12.6732	Not different
C5_01230C_A	12.4859	12.5654	Not different
C4_04830W_A	12.5789	12.6411	Not different
C1_10930C_A	12.5741	12.7036	Not different
C1_00730C_A	12.6725	12.7395	Not different
C1_02370C_A	12.6079	12.6865	Not different
C3_00760W_A	12.566	12.7193	Not different
C1_04730C_A	12.5203	12.572	Not different
C1_07110W_A	12.664	12.7267	Not different
C4_04160W_A	12.5268	12.6768	Not different
C7_01710W_A	12.533	12.5997	Not different
C4_06110C_A	12.7043	12.6773	Not different
C3_06590W_A	12.5809	12.7434	Not different
C3_07250W_A	12.5508	12.4722	Not different
C3_06920W_A	12.4312	12.7116	Not different
C4_01870C_A	12.5758	12.6314	Not different
C1_14420W_A	12.6965	12.6758	Not different
C1_03400W_A	12.6921	12.6857	Not different
CR_01350C_A	12.5312	12.5234	Not different
C4_05180C_A	12.5916	12.6523	Not different
C1_07880C_A	12.6148	12.5013	Not different
C1_09990W_A	12.499	12.6416	Not different
C3_01950C_A	12.4995	12.5878	Not different
C2_03790C_A	12.6226	12.6593	Not different
C1_08220W_A	12.6579	12.6681	Not different
C4_01660W_A	12.5413	12.6245	Not different
C5_02850W_A	12.5622	12.7965	Not different
C5_04670W_A	12.6199	12.6126	Not different
C2_05110W_A	12.5693	12.5071	Not different
C3_07010W_A	12.5814	12.5894	Not different
CR_09300C_A	12.6426	12.6448	Not different
C7_00320C_A	12.7242	12.7358	Not different
C1_02650W_A	12.5502	12.5799	Not different
C2_03020C_A	12.7121	12.7248	Not different
C3_06300W_A	12.633	12.6973	Not different
C1_14140C_A	12.6354	12.721	Not different
C4_05960W_A	12.5541	12.5079	Not different
C1_09690W_A	12.6335	12.7158	Not different
CR_01740W_A	12.4998	12.5731	Not different
C2_04370W_A	12.5229	12.5785	Not different
C7_03220C_A	12.5683	12.7473	Not different
C4_06800W_A	12.5698	12.5717	Not different
C3_00490W_A	12.6361	12.6552	Not different
CR_05750W_A	12.6233	12.5689	Not different
C7_03490W_A	12.5074	12.4999	Not different
C5_04750C_A	12.5769	12.3446	Not different
C1_09080C_A	12.7706	12.8055	Not different
C2_10440C_A	12.5711	12.6663	Not different
C4_07060W_A	12.714	12.6747	Not different
C1_14470W_A	12.6428	12.7139	Not different
C1_03440C_A	12.5348	12.7361	Not different
C4_03960W_A	12.3159	12.4137	Not different
C2_08100W_A	12.5085	12.4503	Not different
C5_00300C_A	12.597	12.6184	Not different
CR_07590W_A	12.5203	12.5347	Not different
C4_05970W_A	12.624	12.6083	Not different
CR_00540C_A	12.4913	12.4334	Not different
C6_01150W_A	12.6678	12.7996	Not different
C1_00650C_A	12.4527	12.5028	Not different
C3_07680W_A	12.5753	12.5479	Not different
C6_03650C_A	12.5533	12.5766	Not different
CR_00400C_A	12.5597	12.5892	Not different
C4_02120W_A	12.4466	12.6158	Not different
C2_09400C_A	12.5708	12.7285	Not different
C6_00560W_A	12.4803	12.5997	Not different
CR_08050C_A	12.5449	12.594	Not different
CR_03420C_A	12.7242	12.601	Not different
C7_04040C_A	12.4862	12.5883	Not different
C7_02810W_A	12.6069	12.6274	Not different
C2_01380W_A	12.6671	12.5856	Not different
C4_00780C_A	12.5032	12.549	Not different
C1_06080C_A	12.3621	12.516	Not different
C4_00970C_A	12.7787	12.7041	Not different
C7_01840W_A	12.5296	12.6508	Not different
CR_00120C_A	12.5921	12.562	Not different
CR_06070W_A	12.6445	12.6699	Not different
C1_01050C_A	12.4798	12.5361	Not different
C7_03940C_A	12.5418	12.638	Not different
C5_04430C_A	12.5276	12.5016	Not different
C1_14120C_A	12.6015	12.3895	Not different
C6_03920W_A	12.4295	12.4938	Not different
CR_02770C_A	12.402	12.5448	Not different
C1_07270W_A	12.4579	12.5829	Not different
C7_00250C_A	12.4776	12.4828	Not different
C6_03350C_A	12.48	12.4047	Not different
C4_02860W_A	12.4119	12.469	Not different
C3_07000W_A	12.5124	12.5579	Not different
C4_03590C_A	12.5781	12.658	Not different
C2_06230W_A	12.5786	12.6356	Not different
C5_00830C_A	12.5216	12.5205	Not different
C3_07610W_A	12.5436	12.6544	Not different
C2_06320W_A	12.6536	12.7606	Not different
C5_00500W_A	12.5599	12.5875	Not different
C4_05740C_A	12.4976	12.5626	Not different
C1_02260C_A	12.3763	12.4696	Not different
C4_05630W_A	12.4854	12.4958	Not different
C3_06560W_A	12.5589	12.5364	Not different
C6_00190W_A	12.5278	12.5609	Not different
C2_02050C_A	12.515	12.6632	Not different
C4_04240C_A	12.7053	12.8208	Not different
C7_00890C_A	12.5061	12.5191	Not different
C1_13930W_A	12.6647	12.6583	Not different
C3_01760W_A	12.5908	12.6211	Not different
C4_00770C_A	12.3739	12.4743	Not different
C3_03680W_A	12.5559	12.4449	Not different
C2_04240C_A	12.3932	12.514	Not different
CR_08640C_A	12.5428	12.529	Not different
C6_01220C_A	12.4603	12.5205	Not different
C4_02290W_A	12.4113	12.5543	Not different
C1_08450C_A	12.525	12.4422	Not different
C3_04780C_A	12.4573	12.5395	Not different
C2_04230W_A	12.5114	12.6505	Not different
C1_14250C_A	12.5665	12.4801	Not different
C1_11400C_A	12.5402	12.6632	Not different
C2_00710W_A	12.495	12.535	Not different
CR_03470W_A	12.5273	12.3382	Not different
C3_02260C_A	12.4353	12.5659	Not different
C3_07320W_A	12.6455	12.5251	Not different
CR_05950C_A	12.5738	12.5911	Not different
C6_00620W_A	12.4107	12.4069	Not different
CR_09550C_A	12.3903	12.5802	Not different
C2_08190W_A	12.4409	12.4446	Not different
C1_04910C_A	12.3711	12.4938	Not different
C4_06540W_A	12.4169	12.4604	Not different
C2_02000W_A	12.4453	12.4929	Not different
C3_01700W_A	12.4966	12.5426	Not different
C7_02790C_A	12.5713	12.7178	Not different
C4_01300W_A	12.4806	12.3529	Not different
C7_02390W_A	12.3638	12.3307	Not different
C1_13220C_A	12.4784	12.5889	Not different
C4_00300C_A	12.6182	12.5256	Not different
C1_13320C_A	12.5756	12.6211	Not different
C4_04260C_A	12.4897	12.5992	Not different
C4_05320W_A	12.44	12.4234	Not different
C4_07130W_A	12.5561	12.5579	Not different
C2_03800C_A	12.5208	12.4054	Not different
C5_02400W_A	12.4595	12.4137	Not different
C7_00670C_A	12.5064	12.6409	Not different
C3_05700W_A	12.7308	12.8519	Not different
C1_06530C_A	12.4701	12.5431	Not different
CR_07000C_A	12.3156	12.4334	Not different
C1_00530C_A	12.4961	12.5493	Not different
C2_00190C_A	12.5177	12.49	Not different
C5_03390C_A	12.3547	12.547	Not different
C5_04100W_A	12.4929	12.4286	Not different
C7_04200C_A	12.5116	12.5673	Not different
C2_03540W_A	12.539	12.4295	Not different
C4_05280W_A	12.3521	12.4467	Not different
C1_07440W_A	12.491	12.4386	Not different
C1_14040W_A	12.376	12.5687	Not different
C2_04760W_A	12.6505	12.6403	Not different
CR_10230W_A	12.4905	12.52	Not different
C4_06740C_A	12.4164	12.4189	Not different
C1_03760C_A	12.4014	12.3262	Not different
CR_10600C_A	12.5148	12.4754	Not different
C2_09740W_A	12.4239	12.4757	Not different
CR_03500W_A	12.5405	12.3961	Not different
C1_00460W_A	12.4931	12.4795	Not different
C4_03200C_A	12.2544	12.4331	Not different
CR_08350W_A	12.4065	12.5911	Not different
C3_05220W_A	12.5087	13.0139	Not different
C5_01800C_A	12.4334	12.5456	Not different
C2_07190C_A	12.3629	12.4722	Not different
C2_03300W_A	12.4776	12.4026	Not different
C3_04400C_A	12.4411	12.5414	Not different
C6_03250W_A	12.4014	12.334	Not different
C5_02050W_A	12.514	12.6701	Not different
C2_09970C_A	12.3676	12.495	Not different
C2_05220C_A	12.4256	12.444	Not different
C7_00360W_A	12.4414	12.5752	Not different
C3_00880W_A	12.5926	12.5019	Not different
C1_03160C_A	12.3877	12.319	Not different
C2_04170C_A	12.4088	12.6024	Not different
C4_04710W_A	12.4301	12.4155	Not different
C6_03290W_A	12.4037	12.5033	Not different
C3_01160W_A	12.5607	12.5551	Not different
CR_02140W_A	12.4043	12.382	Not different
C4_02110W_A	12.3687	12.4488	Not different
C1_14430C_A	12.5708	12.4746	Not different
C2_01920C_A	12.3699	12.4865	Not different
C6_02810C_A	12.4447	12.5755	Not different
CR_06140W_A	12.5743	12.6364	Not different
C4_06250C_A	12.4838	12.5307	Not different
C2_01170C_A	12.4857	12.4833	Not different
C2_02490C_A	12.5508	12.6086	Not different
C4_04720W_A	12.5252	12.129	Not different
C6_03800C_A	12.3335	12.5695	Not different
C3_07480W_A	12.4068	12.4941	Not different
C1_07780W_A	12.3869	12.4271	Not different
CR_09960C_A	12.52	12.4915	Not different
C6_00250W_A	12.567	12.4616	Not different
C3_02370C_A	12.5408	12.5954	Not different
C2_05780C_A	12.4819	12.5493	Not different
C7_02800W_A	12.5291	12.5426	Not different
CR_08370W_A	12.4725	12.3349	Not different
C4_00340W_A	12.3742	12.4449	Not different
C7_04270C_A	12.3957	12.3452	Not different
C1_08300W_A	12.5226	12.479	Not different
C2_10480W_A	12.3068	12.3446	Not different
C1_03280W_A	12.3527	12.4063	Not different
C1_11930W_A	12.7188	12.5571	Not different
C4_02710C_A	12.3489	12.4313	Not different
CR_01770C_A	12.4806	12.54	Not different
CR_04240C_A	12.5756	12.2226	Not different
C2_01970C_A	12.5766	12.5722	Not different
C5_01760C_A	12.3719	12.4515	Not different
C2_04490W_A	12.3771	12.5256	Not different
C2_07480W_A	12.4657	12.5717	Not different
C1_09450C_A	12.3092	12.5165	Not different
C3_00940W_A	12.4326	12.3452	Not different
C1_00310W_A	12.5093	12.6976	Not different
C2_01360C_A	12.4945	12.6037	Not different
C5_03150W_A	12.4819	12.4146	Not different
C3_04410C_A	12.3832	12.5194	Not different
C1_14530W_A	12.3129	12.3936	Not different
C2_01340W_A	12.2971	12.358	Not different
C2_02920W_A	12.3986	12.3121	Not different
C2_04590C_A	12.2992	12.4719	Not different
C1_02430C_A	12.4248	12.4358	Not different
CR_03070W_A	12.34	12.3577	Not different
C1_07120W_A	12.4982	12.319	Not different
CR_10270C_A	12.3264	12.3232	Not different
C5_02900W_A	12.3644	12.4701	Not different
C1_10470W_A	12.4091	12.342	Not different
C1_13760W_A	12.4259	12.4947	Not different
C4_03050C_A	12.4178	12.4298	Not different
C1_07630W_A	12.3183	12.2687	Not different
C7_00700W_A	12.3216	12.5372	Not different
C2_04660C_A	12.4071	12.3836	Not different
C7_00050C_A	12.5794	12.4898	Not different
C2_01130W_A	12.4939	12.4109	Not different
C1_00870W_A	12.4003	12.4103	Not different
C1_07090C_A	12.4397	12.481	Not different
C5_00260W_A	12.4172	12.3193	Not different
C3_06490W_A	12.3989	12.5265	Not different
CR_03600C_A	12.2364	12.3714	Not different
C1_02240W_A	12.4461	12.5623	Not different
C1_04860W_A	12.3415	12.2849	Not different
CR_07520C_A	12.3335	12.267	Not different
C3_04580C_A	12.4054	12.3542	Not different
C2_04930C_A	12.442	12.3889	Not different
C1_08020W_A	12.4331	12.3427	Not different
C4_01510W_A	12.3062	12.3641	Not different
CR_04130C_A	12.469	12.466	Not different
C1_09350W_A	12.3568	12.18	Not different
C6_03320W_A	12.1984	12.49	Not different
C3_01030W_A	12.2784	12.372	Not different
C1_08330C_A	12.2619	12.1011	Not different
C4_00460C_A	12.4161	12.4681	Not different
C5_05300W_A	12.2959	12.2323	Not different
C4_02550C_A	12.3797	12.4016	Not different
C1_05460W_A	12.3565	12.3657	Not different
C2_01320W_A	12.3877	12.3685	Not different
C1_00150C_A	12.4538	12.4476	Not different
C3_05530W_A	12.2809	12.3663	Not different
C6_02140W_A	12.365	12.3226	Not different
C2_08140C_A	12.4411	12.4047	Not different
C2_09670C_A	12.2855	12.242	Not different
C1_12850W_A	12.294	12.1083	Not different
CR_01730W_A	12.3293	12.748	Not different
C1_06970C_A	12.3026	12.2721	Not different
CR_00080W_A	12.6221	12.2025	Not different
C2_03230C_A	12.2815	12.3398	Not different
C1_01300W_A	12.2399	12.3883	Not different
C6_00260W_A	12.4598	12.455	Not different
CR_10060W_A	12.3255	12.4419	Not different
C6_01360W_A	12.2697	12.2208	Not different
C1_07390W_A	12.3192	12.3889	Not different
C2_07260C_A	12.3132	12.3951	Not different
CR_02620C_A	12.2217	12.1698	Not different
C4_00600C_A	12.5021	12.4598	Not different
C3_02600C_A	12.2632	12.2758	Not different
C1_08100W_A	12.2638	12.3726	Not different
C7_00720W_A	12.3171	12.2653	Not different
C5_03090W_A	12.367	12.334	Not different
C1_05410C_A	12.4082	12.3849	Not different
C3_07700W_A	12.2506	12.2571	Not different
C3_03490W_A	12.3603	12.4044	Not different
CR_02990C_A	12.2998	12.3615	Not different
C6_00160W_A	12.3231	12.3688	Not different
C6_00310W_A	12.4011	12.2687	Not different
C1_06130C_A	12.2579	12.4146	Not different
C4_02100C_A	12.2039	12.3976	Not different
C3_07090W_A	12.2377	12.3701	Not different
CR_02970C_A	12.3362	12.3121	Not different
C3_05000W_A	12.1912	12.3805	Not different
C5_05470W_A	12.3418	12.3327	Not different
C1_10180C_A	12.3586	12.2701	Not different
CR_01680C_A	12.3957	12.4663	Not different
C1_01130W_A	12.3001	12.2862	Not different
C1_02640C_A	12.2156	12.2633	Not different
C3_01750C_A	12.3216	12.2839	Not different
C4_02280W_A	12.2582	12.2208	Not different
CR_03620C_A	12.343	12.458	Not different
C3_07740W_A	12.2424	12.3615	Not different
C4_06690C_A	12.3329	12.4604	Not different
C2_09580W_A	12.3952	12.2765	Not different
CR_00200W_A	12.4105	12.1523	Not different
C5_04000W_A	12.1951	12.1106	Not different
C2_03550C_A	12.3225	12.2926	Not different
CR_06860C_A	12.2475	12.3805	Not different
C1_13780W_A	12.4065	12.5431	Not different
C3_02940C_A	12.1919	12.1611	Not different
C3_01940C_A	12.0691	12.2798	Not different
C7_03600W_A	12.1948	12.3141	Not different
C3_02210C_A	12.2204	12.318	Not different
CR_07620W_A	12.287	12.2626	Not different
C4_02300W_A	12.1896	12.1825	Not different
C6_02380W_A	12.3062	12.1286	Not different
C3_02590W_A	12.2281	12.2902	Not different
C5_00670C_A	12.3658	12.2355	Not different
C7_03960C_A	12.2694	12.2064	Not different
C4_00470C_A	12.2541	12.3154	Not different
CR_07560W_A	12.321	12.3998	Not different
C7_00880C_A	12.386	12.4446	Not different
C1_05160C_A	12.2688	12.0149	Not different
CR_01490C_A	12.2481	12.2268	Not different
C1_13510C_A	12.1734	12.2451	Not different
C1_06480C_A	12.2085	12.2208	Not different
C2_06880C_A	12.1807	12.2362	Not different
C2_01470W_A	12.2821	12.332	Not different
CR_10780C_A	12.2858	12.251	Not different
C4_04440W_A	12.237	12.1968	Not different
C1_05950C_A	12.1902	12.2982	Not different
C2_07460W_A	12.2528	12.2524	Not different
C4_03790W_A	12.2469	12.3517	Not different
C2_06960W_A	12.2275	12.0321	Not different
C1_10120C_A	12.2519	12.2949	Not different
C5_05170W_A	12.2211	12.2275	Not different
C4_01970W_A	12.1727	12.3452	Not different
CR_05120W_A	12.3107	12.2599	Not different
C4_01410W_A	12.3192	12.4032	Not different
C6_02590C_A	12.1721	12.4127	Not different
C1_12780W_A	12.1961	12.3817	Not different
CR_09320C_A	12.2772	12.3265	Not different
C1_03070C_A	12.302	12.1713	Not different
C2_05290C_A	12.2026	12.3976	Not different
C3_01210C_A	12.2007	12.2362	Not different
C2_00970C_A	12.2297	12.2382	Not different
C7_00940W_A	12.312	12.4038	Not different
C1_13330C_A	12.2065	12.3065	Not different
C2_09590C_A	12.2443	12.1688	Not different
C6_01180C_A	12.1082	12.4419	Not different
CR_06050W_A	12.1261	12.3177	Not different
C1_08210C_A	12.3338	12.2014	Not different
C7_00660W_A	12.398	12.3391	Not different
C2_06600W_A	12.2075	12.0649	Not different
C1_01470W_A	12.2772	12.3216	Not different
C7_02320W_A	12.121	12.2959	Not different
C3_07500W_A	12.2393	12.2879	Not different
C3_01180C_A	12.4014	12.4915	Not different
C4_06230C_A	12.2262	12.2379	Not different
C6_00210W_A	12.2654	12.2493	Not different
C6_04540C_A	12.295	12.2486	Not different
C1_07250C_A	12.2297	12.3411	Not different
C3_01980C_A	12.2768	12.3382	Not different
C7_04010W_A	12.3495	12.4057	Not different
CR_01260W_A	12.1224	12.1531	Not different
CR_01660C_A	12.1991	12.1549	Not different
C3_04420W_A	12.2249	12.3842	Not different
C1_08990C_A	12.2641	12.3517	Not different
C1_01640W_A	12.1677	12.3395	Not different
C2_04360W_A	12.1909	12.2832	Not different
C2_00700W_A	12.3869	12.3622	Not different
C3_01390C_A	12.1237	12.2982	Not different
C4_06100W_A	12.2898	12.242	Not different
CR_09600C_A	12.0935	12.2208	Not different
C6_02190C_A	12.2259	12.2198	Not different
C5_03820C_A	12.1767	12.2718	Not different
C6_04360C_A	12.1357	12.2839	Not different
C1_04200C_A	12.2236	12.2862	Not different
CR_05790C_A	12.4186	12.2575	Not different
C1_01010W_A	12.1724	12.1026	Not different
C1_05490C_A	12.1261	12.2138	Not different
CR_06950C_A	12.0045	12.5878	Not different
C1_14320C_A	12.1554	12.2431	Not different
CR_05310W_A	12.058	12.2011	Not different
C6_03180C_A	12.4195	12.3958	Not different
CR_06170W_A	12.1627	12.351	Not different
C1_14170W_A	12.1435	12.2424	Not different
C1_13550C_A	12.2075	12.123	Not different
C2_02310W_A	12.1984	12.1038	Not different
C4_02340W_A	12.1313	12.3986	Not different
C3_04290C_A	12.2885	12.2694	Not different
C1_04490W_A	12.1922	12.2929	Not different
C2_08630C_A	12.1767	12.2184	Not different
CR_07350W_A	12.156	12.2782	Not different
C3_00630W_A	12.1134	12.3098	Not different
CR_02300C_A	12.1217	12.2734	Not different
C1_05680C_A	12.1085	12.2131	Not different
C1_11920W_A	12.1344	12.1843	Not different
C4_00370W_A	12.1889	12.2578	Not different
C2_00510W_A	12.1186	12.1724	Not different
C6_04470C_A	12.2998	12.3558	Not different
C2_00770W_A	12.078	12.0425	Not different
C2_04780W_A	12.2443	12.2657	Not different
CR_06040W_A	12.3035	12.2537	Not different
C1_02860C_A	12.0998	12.1582	Not different
C1_00490C_A	12.1644	12.2152	Not different
C1_10800C_A	12.1196	12.046	Not different
C5_04170W_A	12.245	12.2956	Not different
C3_06120C_A	12.2697	12.3587	Not different
C6_01350W_A	12.1784	12.2995	Not different
C5_05210W_A	12.1486	12.3517	Not different
CR_02460W_A	12.1621	12.2879	Not different
C2_01680C_A	12.2925	12.3507	Not different
CR_00440C_A	12.3092	12.316	Not different
C2_03260W_A	12.0227	12.2233	Not different
C5_03760C_A	12.0773	12.1764	Not different
C3_07040C_A	12.0984	12.1771	Not different
C2_09780C_A	12.0709	12.189	Not different
C7_03450C_A	12.0576	12.0425	Not different
C1_05240C_A	12.1717	12.332	Not different
C6_01670W_A	12.2447	12.3587	Not different
C1_01450W_A	12.2626	12.0854	Not different
C6_00390W_A	12.157	12.1368	Not different
C4_03130W_A	12.2272	12.2018	Not different
C4_03000C_A	12.1367	12.2358	Not different
C1_04760C_A	12.0872	12.19	Not different
C2_07440C_A	12.2827	12.2127	Not different
C6_00570C_A	12.2845	12.2558	Not different
C3_03590W_A	12.2478	12.2434	Not different
C1_01030W_A	12.1978	12.0762	Not different
CR_09070C_A	12.053	12.2156	Not different
C2_02730W_A	12.1401	12.2626	Not different
C2_00470W_A	12.1384	12.2145	Not different
C1_01110C_A	12.1476	11.9106	Not different
C2_10260C_A	12.0995	12.1435	Not different
CR_00130C_A	12.1047	12.2949	Not different
C6_00600C_A	12.2017	12.1691	Not different
C3_06750W_A	12.0695	12.2043	Not different
C3_01500C_A	12.1412	12.1034	Not different
C2_00390C_A	12.0935	12.0758	Not different
C1_08120W_A	12.1503	12.129	Not different
C2_05680W_A	12.154	12.2482	Not different
C2_02260W_A	12.0602	12.1151	Not different
C5_00090C_A	12.1981	12.2316	Not different
C1_12340C_A	12.1483	12.1897	Not different
C7_04030C_A	12.0897	12.1439	Not different
C3_02950C_A	12.1466	12.0205	Not different
C5_00100C_A	12.058	12.2441	Not different
CR_10590W_A	12.1687	12.224	Not different
C1_12740W_A	11.9831	12.085	Not different
C5_00730W_A	12.2998	12.3401	Not different
C2_09390W_A	12.0755	12.1677	Not different
C1_10780C_A	12.0421	12.1147	Not different
C3_04180W_A	12.1833	12.2	Not different
C2_10530C_A	12.1863	12.0919	Not different
C7_03830C_A	12.1237	12.2365	Not different
C1_12250C_A	12.0967	12.1022	Not different
C1_10070C_A	12.0591	12.139	Not different
C1_01630W_A	12.0011	12.1957	Not different
C3_04990W_A	12.178	12.16	Not different
C5_00560W_A	11.9694	12.075	Not different
C1_13900C_A	12.2108	12.3167	Not different
C7_01490W_A	12.0326	12.1993	Not different
C1_09520C_A	12.1065	11.904	Not different
C5_00630C_A	12.0623	12.1622	Not different
C3_05030W_A	12.111	12.1756	Not different
C5_02180C_A	12.2469	12.1494	Not different
C3_06140W_A	12.0271	12.1253	Not different
CR_08600C_A	12.1717	12.0629	Not different
C1_04700C_A	12.0991	12.0973	Not different
C5_05020C_A	11.9678	12.0808	Not different
C6_02740W_A	12.0201	12.139	Not different
C1_01270W_A	12.1543	12.1479	Not different
C3_03890W_A	12.1303	12.1818	Not different
C4_02430W_A	12.0823	12.2113	Not different
C5_03570W_A	12.1023	11.9664	Not different
C5_00130C_A	11.9747	12.1724	Not different
C4_00390W_A	12.1244	12.1121	Not different
CR_09860W_A	12.1994	12.1102	Not different
C4_03850W_A	11.9985	11.792	Not different
C7_02330W_A	12.1364	12.0961	Not different
CR_02050C_A	12.182	12.1556	Not different
CR_01080W_A	12.134	12.2368	Not different
C1_10720C_A	12.183	12.1402	Not different
C3_00720W_A	12.3547	12.4479	Not different
C5_02650C_A	12.1813	12.2758	Not different
CR_04480C_A	12.0918	12.0637	Not different
C1_10230C_A	12.068	12.0197	Not different
C7_01580W_A	12.078	12.1174	Not different
C5_01780W_A	12.0784	12.1742	Not different
C1_02250W_A	12.0773	12.1702	Not different
C4_00380W_A	12.1141	12.1464	Not different
C2_09150W_A	12.1019	12.2138	Not different
C1_00380C_A	12.0851	12.0621	Not different
C4_04410C_A	12.1418	12.1312	Not different
C2_04130W_A	12.0851	12.1335	Not different
C6_01860C_A	12.0851	12.0063	Not different
C4_00330C_A	12.037	12.048	Not different
C1_05850W_A	12.0011	12.0594	Not different
C2_04020C_A	12.0414	12.1968	Not different
C1_13960W_A	12.0145	12.1523	Not different
C1_08240C_A	12.0501	11.9655	Not different
C6_01710C_A	12.201	12.195	Not different
C7_04310C_A	12.2033	12.1162	Not different
C1_01750W_A	12.158	12.1582	Not different
C2_00370W_A	12.112	12.1615	Not different
C1_01100W_A	11.9697	12.0816	Not different
C2_00730C_A	12.2091	12.1925	Not different
C1_06700W_A	12.1439	12.2832	Not different
C3_02760C_A	12.1554	12.0676	Not different
CR_03000C_A	12.0826	12.0754	Not different
CR_07020W_A	12.1075	12.117	Not different
C6_01850W_A	12.113	12.1669	Not different
C1_07970C_A	12.0216	12.0205	Not different
C5_03400C_A	12.0493	11.9218	Not different
C7_03160W_A	12.0479	12.2201	Not different
C1_06020W_A	12.0064	12.0653	Not different
C2_00610C_A	11.9482	12.1549	Not different
C3_07670W_A	11.9955	12.0727	Not different
CR_09310W_A	11.9891	12.1208	Not different
CR_05030W_A	12.0587	12.1611	Not different
C2_07540W_A	12.0815	11.9218	Not different
C1_01910W_A	12.054	12.242	Not different
C4_01730C_A	11.9831	12.1185	Not different
C3_06270C_A	11.8984	11.973	Not different
C6_00780W_A	12.0716	12.1578	Not different
C7_03320C_A	12.0242	12.1178	Not different
C3_07230W_A	12.0461	12.1549	Not different
C6_00200C_A	12.0308	12.0629	Not different
C5_05110C_A	12.0134	12.0213	Not different
C7_03390C_A	12.0056	12.149	Not different
C2_02320C_A	11.9505	11.9705	Not different
C5_00490C_A	11.92	12.0452	Not different
C5_04060C_A	11.9884	12.1706	Not different
C6_01980C_A	12.0805	12.0684	Not different
C4_06850C_A	12.0974	12.0723	Not different
C1_06400C_A	12.159	12.1986	Not different
C5_02530W_A	11.9016	12.0425	Not different
CR_08040W_A	11.9458	11.9402	Not different
C2_07350W_A	12.1103	12.2075	Not different
C2_10110W_A	12.0242	11.9676	Not different
C6_01740C_A	12.0712	11.9432	Not different
C4_07200C_A	12.0851	11.958	Not different
C7_00300W_A	12.0071	12.0165	Not different
C1_00890W_A	11.9682	12.0108	Not different
C5_00570W_A	12.0641	12.2163	Not different
CR_09440C_A	12.0333	12.1886	Not different
C6_00950C_A	12.0594	11.9618	Not different
C3_03560W_A	12.0282	12.0519	Not different
C7_03020C_A	11.9337	11.8602	Not different
C4_04510W_A	12.1051	12.1442	Not different
C3_00830C_A	11.9736	12.0969	Not different
C2_05170W_A	12.0403	12.0409	Not different
C2_07940C_A	11.9286	12.0629	Not different
CR_02530W_A	12.155	12.0019	Not different
C6_04350C_A	12.3038	12.3055	Not different
C6_00670W_A	12.0352	11.9793	Not different
C1_01830C_A	12.0179	12.0738	Not different
C1_13170C_A	12.1155	12.1968	Not different
CR_00070W_A	12.2722	12.1975	Not different
C3_06020W_A	11.9895	12.0988	Not different
C3_05560W_A	11.9016	12.1637	Not different
C3_00470W_A	11.9981	12.1297	Not different
C2_07660W_A	11.9172	12.1709	Not different
C2_06110W_A	11.8676	11.9114	Not different
C7_02970W_A	12.0522	12.0333	Not different
CR_00570W_A	12.0271	12.0835	Not different
C6_00760W_A	11.9416	11.9643	Not different
CR_03900W_A	12.0414	12.0696	Not different
CR_01000C_A	12.0493	12.1379	Not different
C1_05780W_A	12.1189	12.0738	Not different
C1_03790C_A	12.0275	11.808	Not different
C2_03500W_A	12.0026	12.1125	Not different
C3_04920C_A	11.9732	12.0193	Not different
C5_04360C_A	11.9341	11.8979	Not different
C1_11760C_A	11.8737	11.8723	Not different
CR_01180W_A	11.8398	11.9929	Not different
C1_08160W_A	11.9709	11.9875	Not different
C1_00130C_A	12.0995	12.1305	Not different
C3_04490W_A	11.9667	12.0692	Not different
CR_02670C_A	12.1607	12.1178	Not different
C1_09070W_A	11.8684	12.0205	Not different
C7_03420C_A	11.9144	12.1564	Not different
C5_00880C_A	11.898	12.205	Not different
C1_04780C_A	11.9369	11.9474	Not different
C1_10700C_A	11.8786	12.0649	Not different
CR_01210C_A	12.0769	11.983	Not different
C3_00570C_A	12.0227	12.0229	Not different
C1_10440W_A	11.9605	11.9929	Not different
C1_03300C_A	12.0326	12.0804	Not different
C7_00010C_A	12.1584	12.1483	Not different
CR_03150W_A	11.9	12.0076	Not different
C1_13280C_A	11.9609	11.9053	Not different
C2_05910W_A	12.0127	12.1556	Not different
CR_08700C_A	11.8729	11.7953	Not different
C3_06470W_A	12.1506	12.2089	Not different
C4_00650W_A	11.9172	12.0205	Not different
C2_09820W_A	12.0508	11.9664	Not different
C3_03720W_A	11.9517	11.9747	Not different
C1_10270C_A	11.9318	11.9817	Not different
C1_13110C_A	12.0727	12.0365	Not different
C4_01200C_A	11.9663	11.9014	Not different
CR_05650W_A	11.8944	11.9601	Not different
CR_02430C_A	11.9575	12.0696	Not different
C3_06230W_A	12.0598	12.1582	Not different
C1_04020C_A	11.8944	12.0819	Not different
C3_02430W_A	11.9474	12.0092	Not different
C4_03800C_A	11.9423	11.9793	Not different
C1_02880C_A	12.0175	11.9871	Not different
CR_03460W_A	11.8988	11.947	Not different
C7_01660C_A	12.0417	12.0668	Not different
C1_07700C_A	11.933	12.0765	Not different
C4_07240W_A	12.0602	12.1684	Not different
C5_01420W_A	11.938	11.9797	Not different
C3_06250W_A	11.8394	11.879	Not different
C3_07170C_A	11.9918	12.0157	Not different
C3_04560W_A	12.1641	11.784	Not different
C5_02700W_A	11.9493	12.0201	Not different
CR_06780W_A	11.8717	11.9123	Not different
CR_01390W_A	12.0157	12.0136	Not different
C1_06820W_A	11.9717	11.9483	Not different
CR_10010C_A	12.0744	12.0981	Not different
C7_01340W_A	11.9505	11.9304	Not different
C1_04670W_A	11.8948	11.9668	Not different
C3_01600W_A	12.0105	11.857	Not different
C2_06870C_A	11.9341	11.9834	Not different
C1_05750C_A	11.9659	12.0161	Not different
CR_08550W_A	11.952	11.7972	Not different
C2_02450C_A	12.0587	11.857	Not different
C3_03880C_A	11.9349	11.9855	Not different
CR_05990C_A	12.1784	12.103	Not different
C4_07090C_A	11.9489	11.9966	Not different
C3_06710W_A	11.9955	11.9933	Not different
C3_04760C_A	12.0238	12.0823	Not different
C2_05760C_A	11.9092	11.886	Not different
C7_04050W_A	11.9816	11.9685	Not different
CR_09510C_A	11.8268	12.0144	Not different
C2_05820W_A	11.7822	11.8758	Not different
C4_07230C_A	12.3092	12.1398	Not different
C2_08850C_A	11.9345	11.9235	Not different
C2_09620W_A	11.9243	12.0104	Not different
C5_04570C_A	12.0659	11.93	Not different
C1_08230C_A	12.0049	12.0668	Not different
C4_05550C_A	11.8539	11.9313	Not different
C5_01070C_A	12.0634	12.1688	Not different
CR_05970C_A	12.0245	11.9622	Not different
C1_04600C_A	11.977	11.875	Not different
C4_01440W_A	11.836	11.9513	Not different
CR_08930C_A	11.8581	11.9559	Not different
CR_07390C_A	12.009	11.8674	Not different
C3_05360C_A	11.916	12.0144	Not different
C3_04130W_A	11.8452	11.9647	Not different
C1_14080W_A	12.0791	11.9347	Not different
C3_03510C_A	11.9128	11.8723	Not different
CR_09370W_A	12.0289	11.8953	Not different
C5_00170W_A	11.9625	11.9023	Not different
C1_09380W_A	11.7514	11.8829	Not different
C1_04000C_A	11.8502	11.9201	Not different
C7_01320W_A	11.9326	11.8874	Not different
CR_04580W_A	11.9921	11.997	Not different
C2_05580W_A	11.9808	11.9705	Not different
C1_09360C_A	11.896	12.0047	Not different
C6_03300C_A	11.8498	11.8882	Not different
C1_07140C_A	11.9793	12.0096	Not different
CR_05530C_A	12.0289	11.8882	Not different
C1_05140W_A	12.0847	12.1713	Not different
CR_01300W_A	11.7514	11.7056	Not different
C4_07250C_A	11.8717	11.857	Not different
C2_10760C_A	11.9918	11.8407	Not different
CR_03740C_A	11.7769	11.8949	Not different
C5_02580W_A	11.773	11.7041	Not different
CR_02850C_A	11.9621	11.9743	Not different
C1_00640C_A	12.1261	12.0723	Not different
C5_00980W_A	11.8012	11.8375	Not different
C2_08270C_A	11.9544	11.8931	Not different
C4_00310C_A	11.9505	11.9424	Not different
C6_03080C_A	11.8046	11.8503	Not different
C5_01850C_A	11.954	12.0361	Not different
C1_13640W_A	11.9555	11.8366	Not different
C6_02430W_A	11.9891	11.9291	Not different
C5_05310W_A	11.8655	11.9058	Not different
C7_00570W_A	12.058	11.8173	Not different
C2_03390C_A	11.9478	11.7721	Not different
C4_03080W_A	11.8106	11.9445	Not different
CR_06570C_A	11.844	12.044	Not different
C1_09860C_A	11.8839	11.8343	Not different
C3_01360C_A	11.902	11.9735	Not different
C1_13270W_A	11.7695	11.7982	Not different
C3_02500W_A	11.817	12.0076	Not different
C7_04090C_A	11.9705	12.0241	Not different
C1_09020W_A	11.7835	11.6991	Not different
C1_03600W_A	11.7878	11.8307	Not different
C5_02480W_A	11.9032	11.9445	Not different
C1_01540W_A	11.8272	11.9949	Not different
C3_06110C_A	12.003	12.0413	Not different
C3_07220C_A	11.7835	11.8953	Not different
C5_02560C_A	11.8498	12.0067	Not different
C3_01510W_A	11.9458	11.939	Not different
C4_01190W_A	11.959	12.0047	Not different
C1_02230W_A	12.0311	12.0835	Not different
C2_04380C_A	11.8213	11.9145	Not different
CR_04070W_A	11.7804	11.9937	Not different
C4_02000C_A	11.9012	11.9062	Not different
CR_02810W_A	11.87	11.775	Not different
C7_02300W_A	11.8145	11.7906	Not different
CR_03250C_A	11.9621	12.0301	Not different
C7_00410C_A	12.0286	12.0504	Not different
CR_10660W_A	11.8928	11.8878	Not different
CR_09590W_A	11.7496	11.8075	Not different
C1_01600W_A	11.8556	11.9313	Not different
C4_01290W_A	11.916	11.8736	Not different
CR_00850C_A	11.8814	11.9368	Not different
C1_08760W_A	11.7357	11.8407	Not different
C5_02190C_A	11.8102	11.9019	Not different
C5_02340C_A	12.0319	11.9826	Not different
CR_09230C_A	11.8136	11.7991	Not different
C2_07470W_A	11.8647	12.0132	Not different
C5_01410C_A	11.8729	11.8633	Not different
C4_04660C_A	11.9439	11.9334	Not different
CR_02950C_A	11.8029	11.8311	Not different
C1_04540C_A	11.7598	11.9019	Not different
C2_05030C_A	11.8581	12.0153	Not different
C5_00900C_A	11.8029	11.695	Not different
CR_00110W_A	11.8335	11.8024	Not different
C5_00820W_A	11.9184	11.9145	Not different
C6_03430C_A	11.7531	11.9647	Not different
CR_09990W_A	11.952	11.9368	Not different
C3_02240C_A	11.9152	11.9162	Not different
C1_08670W_A	11.8153	11.9114	Not different
C2_09680W_A	11.7424	11.8028	Not different
C5_04680W_A	11.7809	11.992	Not different
C4_04460C_A	11.9455	11.9813	Not different
C1_00960C_A	11.8639	11.8918	Not different
CR_09240C_A	11.7112	11.9601	Not different
C1_08080C_A	11.7339	11.6986	Not different
C3_00330W_A	11.9732	11.9166	Not different
C1_09200W_A	11.8343	11.8219	Not different
C1_04810W_A	11.9088	11.8674	Not different
C1_13120C_A	11.7002	11.9343	Not different
C1_14350W_A	11.7393	11.8821	Not different
C5_03680W_A	11.8696	11.955	Not different
C1_03460C_A	11.8904	11.8723	Not different
C1_13610C_A	12.0082	11.8852	Not different
C4_03890W_A	11.6788	11.7754	Not different
C6_04580W_A	11.8729	11.8602	Not different
C5_00330C_A	11.7852	11.7673	Not different
C4_05090C_A	11.7761	11.8265	Not different
CR_07780W_A	11.8123	11.8723	Not different
CR_07460C_A	11.8204	11.997	Not different
C5_02490C_A	11.8268	11.8665	Not different
C4_01080W_A	11.9207	11.7274	Not different
C2_04720C_A	11.8352	11.9235	Not different
C7_03840W_A	11.6844	11.6639	Not different
C5_00640C_A	11.7917	11.7086	Not different
C7_03120W_A	11.8568	11.8425	Not different
C1_14100W_A	11.8055	11.7873	Not different
C2_06860W_A	11.7267	11.7333	Not different
C7_00980W_A	11.8968	11.971	Not different
C1_06630W_A	11.8089	11.9377	Not different
CR_08200C_A	11.929	12.0492	Not different
C6_01590W_A	11.9439	11.8182	Not different
C1_12430W_A	11.7835	11.8507	Not different
CR_08490W_A	12.0921	11.5537	Not different
C3_00640W_A	11.7991	11.89	Not different
C3_03180C_A	11.7249	11.7397	Not different
C1_00120C_A	11.8725	11.8543	Not different
C1_11210C_A	11.9032	11.997	Not different
C1_07590C_A	11.7843	11.7911	Not different
C6_04220C_A	11.7053	11.7387	Not different
C1_14590C_A	11.8132	11.691	Not different
C3_06970W_A	11.7447	11.7156	Not different
C1_06110C_A	11.683	11.9027	Not different
C2_07120W_A	11.7611	11.7735	Not different
C6_02880W_A	11.8089	11.8701	Not different
C1_01400C_A	11.7965	11.9197	Not different
C2_10680W_A	11.8314	11.8597	Not different
C1_07190W_A	11.9493	11.8089	Not different
C6_02630C_A	11.8597	11.8633	Not different
C7_01720W_A	11.6619	11.7081	Not different
C6_03620C_A	11.8042	11.8334	Not different
CR_03910C_A	11.9243	11.7868	Not different
CR_01320C_A	11.9124	11.8233	Not different
C4_04350W_A	11.66	11.801	Not different
C3_03300C_A	11.9004	11.8656	Not different
C4_01100C_A	11.9259	11.5932	Not different
C2_07090C_A	11.8343	11.9222	Not different
C4_07100C_A	11.8427	11.8366	Not different
CR_07180W_A	11.823	11.717	Not different
C5_01650C_A	11.7294	11.8154	Not different
C6_03100W_A	11.8465	11.8261	Not different
CR_06640C_A	11.7673	11.7673	Not different
C1_14220C_A	11.8597	11.8316	Not different
CR_08450C_A	11.9455	11.8548	Not different
C5_00580W_A	11.7761	11.8984	Not different
[truncated: 3,761 more rows]
